# Supplementary material
Source: ML conference proceedings conference paper supplement (https://proceedings.neurips.cc/paper_files/paper/2023/hash/484d254ff80e99d543159440a06db0de-Abstract.html)
Supplement: Supplementary file 1 [file 484d254ff80e99d543159440a06db0de-Supplemental-Conference.pdf]

---

# A Guide Through the Zoo of Biased SGD

---

**Yury Demidovich**  
AI Initiative, KAUST  
yury.demidovich@kaust.edu.sa

**Grigory Malinovsky**  
AI Initiative, KAUST  
grigorii.malinovskii@kaust.edu.sa

**Igor Sokolov**  
AI Initiative, KAUST  
igor.sokolov.1@kaust.edu.sa

**Peter Richtárik**  
AI Initiative, KAUST  
peter.richtarik@kaust.edu.sa

## Abstract

Stochastic Gradient Descent (**SGD**) is arguably the most important single algorithm in modern machine learning. Although **SGD** with unbiased gradient estimators has been studied extensively over at least half a century, **SGD** variants relying on biased estimators are rare. Nevertheless, there has been an increased interest in this topic in recent years. However, existing literature on **SGD** with biased estimators (**BiasedSGD**) lacks coherence since each new paper relies on a different set of assumptions, without any clear understanding of how they are connected, which may lead to confusion. We address this gap by establishing connections among the existing assumptions, and presenting a comprehensive map of the underlying relationships. Additionally, we introduce a new set of assumptions that is provably weaker than all previous assumptions, and use it to present a thorough analysis of **BiasedSGD** in both convex and non-convex settings, offering advantages over previous results. We also provide examples where biased estimators outperform their unbiased counterparts or where unbiased versions are simply not available. Finally, we demonstrate the effectiveness of our framework through experimental results that validate our theoretical findings.

## 1 Introduction

Stochastic Gradient Descent (**SGD**) [Robbins and Monro, 1951] is a widely used and effective algorithm for training various models in machine learning. The current state-of-the-art methods for training deep learning models are all variants of **SGD** [Goodfellow et al., 2016; Sun, 2020]. The algorithm has been extensively studied in recent theoretical works [Bottou et al., 2018; Gower et al., 2019; Khaled and Richtárik, 2023]. In practice and theory, **SGD** with *unbiased* gradient oracles is mostly used. However, there has been a recent surge of interest in **SGD** with *biased* gradient oracles, which has been studied in several papers and applied in different domains.

In distributed parallel optimization where data is partitioned across multiple nodes, communication can be a bottleneck, and techniques such as structured sparsity [Alistarh et al., 2018; Wangni et al., 2018] or asynchronous updates [Niu et al., 2011] are involved to reduce communication costs. Nonetheless, sparsified or delayed **SGD**-updates are not unbiased anymore and require additional analysis [Stich and Karimireddy, 2020; Beznosikov et al., 2020].

Zeroth-order methods are often utilized when there is no access to unbiased gradients, e.g., for optimization of black-box functions [Nesterov and Spokoiny, 2017], or for finding adversarial examples in deep learning [Moosavi-Dezfooli et al., 2017; Chen et al., 2017]. Many zeroth-order training methods exploit biased gradient oracles [Nesterov and Spokoiny, 2017; Liu et al., 2018; Bergou et al., 2020; Boucherouite et al., 2022]. Various other techniques as smoothing, proximate

updates and preconditioning operate with inexact gradient estimators [d’Aspremont, 2008; Schmidt et al., 2011; Devolder et al., 2014; Tappenden et al., 2016; Karimireddy et al., 2018].

The aforementioned applications illustrate that **SGD** can converge even if it performs *biased* gradient updates, provided that certain “regularity” conditions are satisfied by the corresponding gradient estimators [Bottou et al., 2018; Ajalloeian and Stich, 2020; Beznosikov et al., 2020; Condat et al., 2022]. Moreover, biased estimators may show better performance over their unbiased equivalents in certain settings [Beznosikov et al., 2020].

In this work we study convergence properties and worst-case complexity bounds of stochastic gradient descent (**SGD**) with a *biased* gradient estimator (**BiasedSGD**; see Algorithm 1) for solving general optimization problems of the form

$$\min_{x \in \mathbb{R}^d} f(x),$$

where the function  $f : \mathbb{R}^d \rightarrow \mathbb{R}$  is possibly nonconvex, satisfies several smoothness and regularity conditions.

**Assumption 0** *Function  $f$  is differentiable,  $L$ -smooth (i.e.,  $\|\nabla f(x) - \nabla f(y)\| \leq L \|x - y\|$  for all  $x, y \in \mathbb{R}^d$ ), and bounded from below by  $f^* \in \mathbb{R}$ .*

We write  $g(x)$  for the gradient estimator, which is biased (i.e.,  $\mathbb{E}[g(x)]$  is not equal to  $\nabla f(x)$ ,  $\mathbb{E}[\cdot]$  stands for the expectation with respect to the randomness of the algorithm), in general. By a gradient estimator we mean a (possibly random) mapping  $g : \mathbb{R}^d \rightarrow \mathbb{R}^d$  with some constraints. We denote by  $\gamma$  an appropriately chosen learning rate, and  $x^0 \in \mathbb{R}^d$  is a starting point of the algorithm.

---

**Algorithm 1** Biased Stochastic Gradient Descent (**BiasedSGD**)

---

**Input:** initial point  $x^0 \in \mathbb{R}^d$ ; learning rate  $\gamma > 0$   
1: **for**  $t = 0, 1, 2, \dots$  **do**  
2:     Construct a (possibly biased) estimator  $g^t \stackrel{\text{def}}{=} g(x^t)$  of the gradient  $\nabla f(x^t)$   
3:     Compute  $x^{t+1} = x^t - \gamma g^t$   
4: **end for**

---

In the strongly convex case,  $f$  has a unique global minimizer which we denote by  $x^*$ , and  $f(x^*) = f^*$ . In the nonconvex case,  $f$  can have many local minima and/or saddle points. It is theoretically intractable to solve this problem to global optimality [Nemirovsky and Yudin, 1983]. Depending on the assumptions on  $f$ , and given some error tolerance  $\varepsilon > 0$ , will seek to find a random vector  $x \in \mathbb{R}^d$  such that one of the following inequalities holds: i)  $\mathbb{E}[f(x) - f^*] \leq \varepsilon$  (convergence in function values); ii)  $\mathbb{E}\|x - x^*\|^2 \leq \varepsilon \|x^0 - x^*\|^2$  (iterate convergence); iii)  $\mathbb{E}\|\nabla f(x)\|^2 \leq \varepsilon^2$  (gradient norm convergence).

## 2 Sources of bias

Practical applications of **SGD** typically involve the training of supervised machine learning models via empirical risk minimization [Shalev-Shwartz and Ben-David, 2014], which leads to optimization problems of a finite-sum structure:

$$f(x) = \frac{1}{n} \sum_{i=1}^n f_i(x). \quad (1)$$

In the single-machine setup,  $n$  is the number of data points,  $f_i(x)$  represents the loss of a model  $x$  on a data point  $i$ . In this setting, data access is expensive,  $g(x)$  is usually constructed with *subsampling* techniques such as minibatching and importance sampling. Generally, a subset  $S \subseteq [n]$  of examples is chosen, and subsequently  $g(x)$  is assembled from the information stored in the gradients of  $\nabla f_i(x)$  for  $i \in S$  only. This leads to estimators of the form  $g(x) = \sum_{i \in S} v_i \nabla f_i(x)$ , where  $v_i$  are random variables typically designed to ensure the unbiasedness [Gower et al., 2019]. In practice, points might be sampled with unknown probabilities. In this scenario, a reasonable strategy to estimate the gradient is to take an average of all sampled  $\nabla f_i$ . In general, the estimator obtained is biased, and

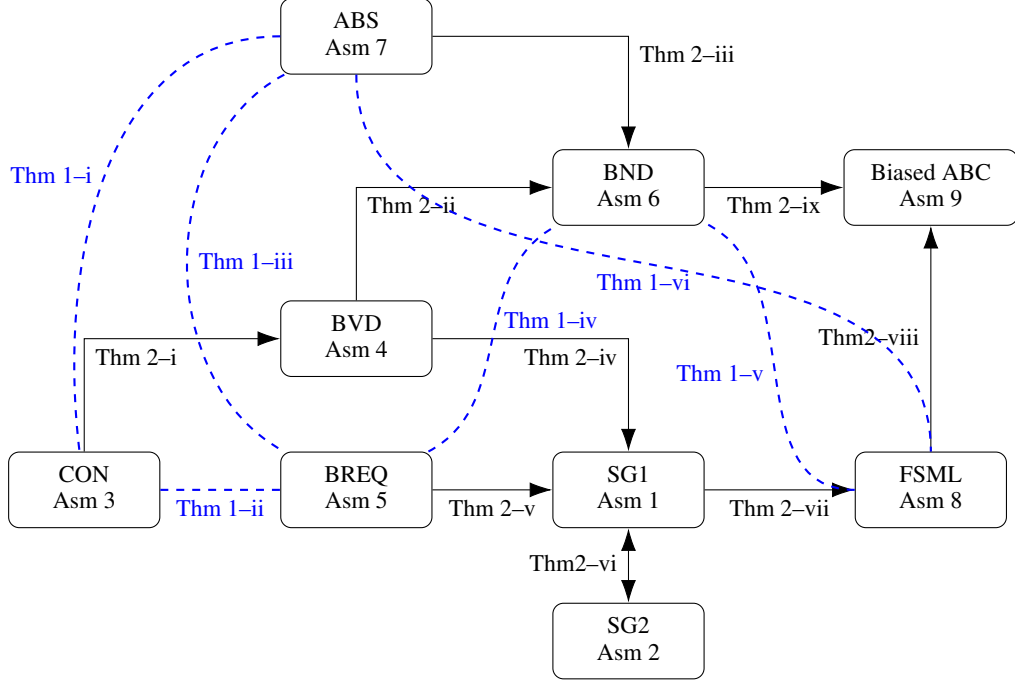

Figure 1: Assumption hierarchy. A single arrow indicates an implication and an absence of a reverse implication. The implications are transitive. A dashed line indicates a mutual absence of implications. Our newly proposed assumption Biased ABC is the most general one.

such sources of bias can be characterized as arising from a lack of information about the subsampling strategy.

In the distributed setting,  $n$  represents the number of machines, and each  $f_i$  represents the loss of model  $x$  on all the training data stored on machine  $i$ . Since communication is typically very expensive, modern gradient-type methods rely on various gradient compression mechanisms that are usually randomized. Given an appropriately chosen compression map  $\mathcal{C} : \mathbb{R}^d \rightarrow \mathbb{R}^d$ , the local gradients  $\nabla f_i(x)$  are first compressed to  $\mathcal{C}_i(\nabla f_i(x))$ , where  $\mathcal{C}_i$  is an independent realization of  $\mathcal{C}$  sampled by machine  $i$  in each iteration, and subsequently communicated to the master node, which performs aggregation (typically averaging). This gives rise to **SGD** with the gradient estimator of the form

$$g(x) = \frac{1}{n} \sum_{i=1}^n \mathcal{C}_i(\nabla f_i(x)). \quad (2)$$

Many important compressors performing well in practice are of biased nature (e.g., Top- $k$ , see Def. 3), which, in general, makes  $g(x)$  biased as well.

Biased estimators are capable of absorbing useful information in certain settings, e.g., in the heterogeneous data regime. Unbiased estimators have to be random, otherwise they are equal to the identity mapping. However, greedy deterministic gradient estimators such as Top- $k$  often lead to better practical performance. In [Beznosikov et al., 2020, Section 4] the authors show an advantage of the Top- $k$  compressor over its randomized counterpart Rand- $k$  when the coordinates of the vector that we wish to compress are distributed uniformly or exponentially. In practice, deterministic biased compressors are widely used for low precision training, and exhibit great performance [Alistarh et al., 2018; Beznosikov et al., 2020].

### 3 Contributions

The most commonly used assumptions for analyzing **SGD** with biased estimators take the form of various structured bounds on the first and the second moments of  $g(x)$ . We argue that assumptions proposed in the literature are often too strong, and may be unrealistic as they do not fully capture how

bias and randomness in  $g(x)$  arise in practice. In order to retrieve meaningful theoretical insights into the operation of **BiasedSGD**, it is important to model the bias and randomness both correctly, so that the assumptions we impart are provably satisfied, and accurately, so as to obtain as tight bounds as possible. Our work is motivated by the need of a more accurate and informative analysis of **BiasedSGD** in the strongly convex and nonconvex settings, which are problems of key importance in optimization research and deep learning. Our results are generic and cover both subsampling and compression-based estimators, among others.

The key contributions of our work are:

- Inspired by recent developments in the analysis of **SGD** in the nonconvex setting [Khaled and Richtárik, 2023], the analysis of **BiasedSGD** [Bottou et al., 2018; Ajalloeian and Stich, 2020], the analysis of biased compressors [Beznosikov et al., 2020], we propose a new assumption, which we call Biased ABC, for modeling the first and the second moments of the stochastic gradient.
- We show in Section 5.2 that Biased ABC is the weakest, and hence the most general, among all assumptions in the existing literature on **BiasedSGD** we are aware of (see Figure 1), including concepts such as Contractive (CON) [Cordonnier, 2018; Stich et al., 2018; Beznosikov et al., 2020], Absolute (ABS) [Sahu et al., 2021], Bias-Variance Decomposition (BVD) [Condat et al., 2022], Bounded Relative Error Quantization (BREQ) [Khirirat et al., 2018b], Bias-Noise Decomposition (BND) [Ajallloeian and Stich, 2020], Strong Growth 1 (SG1) and Strong Growth 2 (SG2) [Beznosikov et al., 2020], and First and Second Moment Limits (FSML) [Bottou et al., 2018] estimators.
- We prove that unlike the existing assumptions, which implicitly assume that the bias comes from either perturbation or compression, Biased ABC also holds in settings such as subsampling.
- We recover the optimal rates for general smooth nonconvex problems and for problems under the PŁ condition in the unbiased case and prove that these rates are also optimal in the biased case.
- In the strongly convex case, we establish a similar convergence result in terms of iterate norms as in [Hu et al., 2021a], however, under milder assumptions and not only for the classical version of **SGD**. Our proof strategy is very different and much simpler.

## 4 Existing models of biased gradient estimators

Since application of a gradient compressor to the gradient constitutes a gradient estimator, below we often reformulate known assumptions and results obtained for biased compressors in the more general form of biased gradient estimators. Beznosikov et al. [2020] analyze **SGD** under the assumption that  $f$  is  $\mu$ -strongly convex, and propose three different assumptions for compressors.

**Assumption 1 (Strong Growth 1, SG1 – Beznosikov et al. [2020])** *Let us say that  $g(x)$  belongs to a set  $\mathbb{B}^1(\alpha, \beta)$  of biased gradient estimators, if, for some  $\alpha, \beta > 0$ , for every  $x \in \mathbb{R}^d$ ,  $g(x)$  satisfies*

$$\alpha \|\nabla f(x)\|^2 \leq \mathbb{E} [\|g(x)\|^2] \leq \beta \langle \mathbb{E} [g(x)], \nabla f(x) \rangle. \quad (3)$$

**Assumption 2 (Strong Growth 2, SG2 – Beznosikov et al. [2020])** *Let us say that  $g(x)$  belongs to a set  $\mathbb{B}^2(\tau, \beta)$  of biased gradient estimators, if, for some  $\tau, \beta > 0$ , for every  $x \in \mathbb{R}^d$ ,  $g(x)$  satisfies*

$$\max \left\{ \tau \|\nabla f(x)\|^2, \frac{1}{\beta} \mathbb{E} [\|g(x)\|^2] \right\} \leq \langle \mathbb{E} [g(x)], \nabla f(x) \rangle. \quad (4)$$

Note that each of Assumptions 1 and 2 imply

$$\mathbb{E} [\|g(x)\|^2] \leq \beta^2 \|\nabla f(x)\|^2. \quad (5)$$

**Assumption 3 (Contractive, CON – Beznosikov et al. [2020])** *Let us say that  $g(x)$  belongs to a set  $\mathbb{B}^3(\delta)$  of biased gradient estimators, if, for some  $\delta > 0$ , for every  $x \in \mathbb{R}^d$ ,  $g(x)$  satisfies*

$$\mathbb{E} [\|g(x) - \nabla f(x)\|^2] \leq \left(1 - \frac{1}{\delta}\right) \|\nabla f(x)\|^2. \quad (6)$$

The last condition is an abstraction of the contractive compression property (see Appendix L). Condat et al. [2022] introduce another assumption for biased compressors, influenced by a bias-variance decomposition equation for the second moment:

$$\mathbb{E} \left[ \|g(x) - \nabla f(x)\|^2 \right] = \|\mathbb{E}[g(x)] - \nabla f(x)\|^2 + \mathbb{E} \left[ \|g(x) - \mathbb{E}[g(x)]\|^2 \right]. \quad (7)$$

Let us write the assumption itself.

**Assumption 4 (Bias-Variance Decomposition, BVD – Condat et al. [2022])** *Let  $0 \leq \eta \leq 1$ ,  $\xi \geq 0$ , for all  $x \in \mathbb{R}^d$ , the gradient estimator  $g(x)$  satisfies*

$$\|\mathbb{E}[g(x)] - \nabla f(x)\|^2 \leq \eta \|\nabla f(x)\|^2, \quad (8)$$

$$\mathbb{E} \left[ \|g(x) - \mathbb{E}[g(x)]\|^2 \right] \leq \xi \|\nabla f(x)\|^2. \quad (9)$$

Khairat et al. [2018b] proposed another assumption on deterministic compressors.

**Assumption 5 (Bounded Relative Error Quantization, BREQ – Khairat et al. [2018b])** *For all  $x \in \mathbb{R}^d$ , for any  $\rho, \zeta \geq 0$ ,*

$$\langle g(x), \nabla f(x) \rangle \geq \rho \|\nabla f(x)\|^2, \quad (10)$$

$$\|g(x)\|^2 \leq \zeta \|\nabla f(x)\|^2. \quad (11)$$

The restriction below was imposed on the gradient estimator  $g(x)$  by Ajalloeian and Stich [2020]. For the purpose of clarity, we rewrote it in the notation adopted in our paper. We refer the reader to Appendix O for the proof of equivalence of these two definitions.

**Assumption 6 (Bias-Noise Decomposition, BND – Ajalloeian and Stich [2020])** *Let  $M, \sigma^2, \varphi^2$  be nonnegative constants, and let  $0 \leq m < 1$ . For all  $x \in \mathbb{R}^d$ ,  $g(x)$  satisfies*

$$\mathbb{E} \left[ \|g(x) - \mathbb{E}[g(x)]\|^2 \right] \leq M \|\mathbb{E}[g(x)]\|^2 + \sigma^2, \quad (12)$$

$$\|\mathbb{E}[g(x)] - \nabla f(x)\|^2 \leq m \|\nabla f(x)\|^2 + \varphi^2. \quad (13)$$

The following assumption was introduced by Sahu et al. [2021] (see also the work of Danilova and Gorbunov [2022]).

**Assumption 7 (Absolute Estimator, ABS – Sahu et al. [2021])** *For all  $x \in \mathbb{R}^d$ , there exists  $\Delta \geq 0$  such that*

$$\mathbb{E} \left[ \|g(x) - \nabla f(x)\|^2 \right] \leq \Delta^2. \quad (14)$$

This condition is tightly related to the contractive compression property (see Appendix M). Further, Bottou et al. [2018] proposed the following restriction on a stochastic gradient estimator.

**Assumption 8 (First and Second Moment Limits, FSML – Bottou et al. [2018])** *There exist constants  $0 < q \leq u$ ,  $U \geq 0$ ,  $Q \geq 0$ , such that, for all  $x \in \mathbb{R}^d$ ,*

$$\langle \nabla f(x), \mathbb{E}[g(x)] \rangle \geq q \|\nabla f(x)\|^2, \quad (15)$$

$$\|\mathbb{E}[g(x)]\| \leq u \|\nabla f(x)\|, \quad (16)$$

$$\mathbb{E} \left[ \|g(x) - \mathbb{E}[g(x)]\|^2 \right] \leq U \|\nabla f(x)\|^2 + Q. \quad (17)$$

Our first theorem, described informally below and stated and proved formally in the appendix, provides required counterexamples of problems and estimators for the diagram in Figure 1.

**Theorem 1 (Informal)** *The assumptions connected by dashed lines in Figure 1 are mutually non-implicative.*

The result says that some pairs of assumptions are in a certain sense unrelated: none implies the other, and vice versa. In the next section, we introduce a new assumption, and provide deeper connections between all assumptions.

## 5 New approach: biased ABC assumption

### 5.1 Brief history

Several existing restrictions on the first moment of the estimator were very briefly outlined in the previous section (see (3), (8), (10), (13), (15)). Khaled and Richtárik [2023] recently introduced a very general and accurate Expected Smoothness assumption (we will call it the ABC-assumption in this paper) on the second moment of the unbiased estimator. Let us note that Polyak and Tsytkin [1973] explored a related assumption during their analysis of pseudogradient algorithms. They succeeded in establishing an asymptotic convergence bound for a variant of gradient descent in the unbiased scenario. In contrast, our study focuses on non-asymptotic convergence rates in the biased setting. We generalize the restrictions (3), (10), (15) on the first moment and combine them with the ABC-assumption to develop our Biased ABC framework.

**Assumption 9 (Biased ABC)** *There exist constants  $A, B, C, b, c \geq 0$  such that the gradient estimator  $g(x)$  for every  $x \in \mathbb{R}^d$  satisfies<sup>1</sup>*

$$\langle \nabla f(x), \mathbb{E}[g(x)] \rangle \geq b \|\nabla f(x)\|^2 - c, \quad (18)$$

$$\mathbb{E}[\|g(x)\|^2] \leq 2A(f(x) - f^*) + B\|\nabla f(x)\|^2 + C. \quad (19)$$

The term  $A(f(x) - f^*)$  in (19) naturally emerges when we bound the expression of the form  $\sum_{i=1}^n q_i \|\nabla f_i(x)\|^2$ ,  $q_i \geq 0$ ,  $i \in [n]$ : while it can not be confined solely by the norm of the overall gradient  $B\|\nabla f(x)\|^2$ , nor by a constant  $C$ , smoothness suffices to bound this by  $A(f(x) - f^*)$ . Further, there exist quadratic stochastic optimization problems where the second moment of a stochastic gradient is precisely equal to  $2(f(x) - f^*)$  (see Richtárik and Takáč [2020]).

Concerning the challenges in verifying the Biased ABC assumption, it is worth mentioning that in Machine Learning, loss functions are commonly bounded from below by  $f^* = 0$ . In Tables 2 and 8, we provide the constants that validate the fulfillment of our assumption by a wide range of practical estimators. Furthermore, Claims 2–4 can aid in determining these constants for various sampling schemes.

### 5.2 Biased ABC as the weakest assumption

As discussed in Section 4, there exists a Zoo of assumptions on the stochastic gradients in literature on [BiasedSGD](#). Our second theorem, described informally below and stated and proved formally in the appendix, says that our new Biased ABC assumption is the least restrictive of all the assumptions reviewed in Section 4.

**Theorem 2** (Informal) *Assumption 9 (Biased ABC) is the weakest among Assumptions 1–9.*

Inequality (8) of BVD or inequality (13) of BND show that one can impose the restriction on the first moment by bounding the norm of the bias. We choose inequality (18) that restrains the scalar product between the estimator and the gradient on purpose: this approach turns out to be more general on its own. In the proof of Theorem 2-ix (see (46) and (47)) we show that (13) implies (18). Below we show the existence of a counterexample that the reverse implication does not hold.

**Claim 1** *There exists a finite-sum minimization problem for which a gradient estimator that satisfies inequality (18) of Assumption 9 does not satisfy inequality (13) of Assumption 6.*

The relationships among Assumptions 1–9 are depicted in Figure 1 based on the results of Theorem 1 and Theorem 2. It is evident from Figure 1 that Assumption 6 (BND) and Assumption 8 (FSML) are mutually non-implicative and represent the most general assumptions among those proposed in Assumptions 1–8.

The most significant difference between our Assumption 9 (Biased ABC) and Assumptions 6 and 8 is the inclusion of the term  $A(f(x) - f^*)$  in the bound on the second moment of the estimator.

<sup>1</sup>In [Khaled and Richtárik, 2023], the “ABC assumption” was introduced in the unbiased case. However, we aim to establish theory for biased estimators. If we simply remove (18), then  $g(x) = -\nabla f(x)$  satisfies (19) with  $A = 0$ ,  $B = 1$ ,  $C = 0$ , yet [BiasedSGD](#) clearly diverges in general.

| Assumption                               | $A$ | $B$                       | $C$                          | $b$                    | $c$                   |
|------------------------------------------|-----|---------------------------|------------------------------|------------------------|-----------------------|
| Asm 1 (SG1) [Beznosikov et al., 2020]    | 0   | $\beta^2$                 | 0                            | $\frac{\alpha}{\beta}$ | 0                     |
| Asm 2 (SG2) [Beznosikov et al., 2020]    | 0   | $\beta^2$                 | 0                            | $\tau$                 | 0                     |
| Asm 3 (CON) [Beznosikov et al., 2020]    | 0   | $2(2 - \frac{1}{\delta})$ | 0                            | $\frac{1}{2\delta}$    | 0                     |
| Asm 4 (BVD) [Condat et al., 2022]        | 0   | $2(1 + \xi + \eta)$       | 0                            | $\frac{1-\eta}{2}$     | 0                     |
| Asm 5 (BREQ) [Khiriir et al., 2018b]     | 0   | $\zeta$                   | 0                            | $\rho$                 | 0                     |
| Asm 6 (BND) [Ajalloeian and Stich, 2020] | 0   | $2(M+1)(m+1)$             | $2(M+1)\varphi^2 + \sigma^2$ | $\frac{1-m}{2}$        | $\frac{\varphi^2}{2}$ |
| Asm 7 (ABS) [Sahu et al., 2021]          | 0   | 2                         | $2\Delta^2$                  | $\frac{1}{2}$          | $\frac{\Delta^2}{2}$  |
| Asm 8 (FSML) [Bottou et al., 2018]       | 0   | $U + u^2$                 | $Q$                          | $q$                    | 0                     |

Table 1: Summary of known assumptions on biased stochastic gradients. Estimators satisfying any of them, belong to our general Biased ABC framework with parameters  $A$ ,  $B$ ,  $C$ ,  $b$  and  $c$  provided in this table. For proofs, we refer the reader to Theorem 13.

The rationale behind this inclusion was detailed in Section 5.1. In general, estimators of the form  $\sum_{i=1}^n q_i |\nabla f_i(x)|^2$ , where  $q_i \geq 0$ , for  $i \in [n]$ , often arise in sampling schemes. We present two practical settings with sampling schemes (see Definitions 1 and 2) that can be described within the Biased ABC framework. These settings, in general, fall outside of the BND and FSML frameworks.

In Section D.2 (see Proof of Theorem 2, parts viii and ix) we present an example of a setting with a minimization problem and a gradient estimator that justifies the introduction of this term: BND and FSML frameworks do not capture the proposed setting, while Biased ABC does capture it.

In Table 1 we provide a representation of each of Assumptions 1 – 8 in our Biased ABC framework (based on the results of Theorem 13). Note that the constants in Table 1 are too pessimistic: given the estimator satisfying one of these assumptions, direct computation of constants in Biased ABC scope for it might lead to much more accurate results. In Table 2 we give a description of popular gradient estimators in terms of the Biased ABC framework. Finally, in Table 3 we list several popular estimators and indicate which of Assumptions 1–9 they satisfy.

| Estimator                                                          | Def     | $A$                                 | $B$                                                                            | $C$                 | $b$              | $c$                 |
|--------------------------------------------------------------------|---------|-------------------------------------|--------------------------------------------------------------------------------|---------------------|------------------|---------------------|
| <b>Biased independent sampling</b><br>[This paper]                 | Def. 1  | $\frac{\max_i \{L_i\}}{\min_i p_i}$ | 0                                                                              | $2A\Delta^* + s^2$  | $\min_i \{p_i\}$ | 0                   |
| <b>Top-<math>k</math></b><br>[Aji and Heafield, 2017]              | Def. 3  | 0                                   | 1                                                                              | 0                   | $\frac{k}{d}$    | 0                   |
| <b>Rand-<math>k</math></b><br>Stich et al. [2018]                  | Def. 4  | 0                                   | $\frac{d}{k}$                                                                  | 0                   | 1                | 0                   |
| <b>Biased Rand-<math>k</math></b><br>[Beznosikov et al., 2020]     | Def. 5  | 0                                   | $\frac{k}{d}$                                                                  | 0                   | $\frac{k}{d}$    | 0                   |
| <b>Adaptive random sparsification</b><br>[Beznosikov et al., 2020] | Def. 6  | 0                                   | 1                                                                              | 0                   | $\frac{1}{d}$    | 0                   |
| <b>General unbiased rounding</b><br>[Beznosikov et al., 2020]      | Def. 7  | 0                                   | $\sup_{k \in \mathbb{Z}} \frac{a_k^2 + a_{k+1}^2}{4a_k a_{k+1}} + \frac{1}{2}$ | 0                   | 1                | 0                   |
| <b>Natural compression</b><br>[Horváth et al., 2022]               | Def. 9  | 0                                   | $\frac{9}{8}$                                                                  | 0                   | 1                | 0                   |
| <b>Scaled integer rounding</b><br>[Sapio et al., 2021]             | Def. 15 | 0                                   | 2                                                                              | $\frac{2d}{\chi^2}$ | $\frac{1}{2}$    | $\frac{d}{2\chi^2}$ |

Table 2: Summary of popular estimators with respective parameters  $A$ ,  $B$ ,  $C$ ,  $b$  and  $c$ , satisfying our general Biased ABC framework. Constants  $L_i$  are from Assumption 13,  $\Delta^*$  is defined in (26). For more estimators, see Table 8.

## 6 Convergence of biased SGD under the biased ABC assumption

Convergence rates of theorems below are summarized in Table 4 and compared to their counterparts.

| Estimator \ Assumption                                   | A1 | A2 | A3 | A4 | A5 | A6 | A7 | A8 | A9 |
|----------------------------------------------------------|----|----|----|----|----|----|----|----|----|
| Biased independent sampling [This paper]                 | ✗  | ✗  | ✗  | ✗  | ✗  | ✗  | ✗  | ✗  | ✓  |
| Top- $k$ sparsification [Aji and Heafield, 2017]         | ✓  | ✓  | ✓  | ✓  | ✓  | ✓  | ✗  | ✓  | ✓  |
| Rand- $k$ [Stich et al., 2018]                           | ✓  | ✓  | ✗  | ✓  | ✗  | ✓  | ✗  | ✓  | ✓  |
| Biased Rand- $k$ [Beznosikov et al., 2020]               | ✓  | ✓  | ✓  | ✓  | ✗  | ✓  | ✗  | ✓  | ✓  |
| Adaptive random sparsification [Beznosikov et al., 2020] | ✓  | ✓  | ✓  | ✓  | ✗  | ✓  | ✗  | ✓  | ✓  |
| General unbiased rounding [Beznosikov et al., 2020]      | ✓  | ✓  | ✗  | ✓  | ✗  | ✓  | ✗  | ✓  | ✓  |
| Natural compression [Horváth et al., 2022]               | ✓  | ✓  | ✓  | ✓  | ✗  | ✓  | ✗  | ✓  | ✓  |
| Scaled integer rounding [Sapio et al., 2021]             | ✓  | ✓  | ✗  | ✓  | ✓  | ✓  | ✓  | ✓  | ✓  |

Table 3: Coverage of popular estimators by known frameworks. For more estimators, see Table 9.

## 6.1 General nonconvex case

**Theorem 3** *Let Assumptions 0 and 9 hold. Let  $\delta^0 \stackrel{\text{def}}{=} f(x^0) - f^*$ , and choose the stepsize such that  $0 < \gamma \leq \frac{b}{LB}$ . Then the iterates  $\{x^t\}_{t \geq 0}$  of BiasedSGD (Algorithm (1)) satisfy*

$$\min_{0 \leq t \leq T-1} \mathbb{E} \left[ \|\nabla f(x^t)\|^2 \right] \leq \frac{2(1 + LA\gamma^2)^T}{b\gamma T} \delta^0 + \frac{LC\gamma}{b} + \frac{c}{b}. \quad (20)$$

While one can notice the possibility of an exponential blow-up in (20), by carefully controlling the stepsize we still can guarantee the convergence of BiasedSGD. In Corollaries 5 and 6 (see the appendix) we retrieve the results of Theorem 2 and Corollary 1 from [Khaled and Richtárik, 2023] for the unbiased case. In Corollary 7 (see the appendix) we retrieve the result that is worse than that in [Ajallooeian and Stich, 2020, Theorem 4] by a multiplicative factor and an extra additive term, but under milder conditions (cf. Biased ABC and BND in Figure 1; see also Claim 1). If we set  $A = c = 0$ , we recover the result of [Bottou et al., 2018, Theorem 4.8] (see Corollary 8 in the appendix).

## 6.2 Convergence under PL-condition

One of the popular generalizations of strong convexity in the literature is the Polyak–Łojasiewicz assumption [Polyak, 1963; Karimi et al., 2016; Lei et al., 2019]. First, we define this condition.

**Assumption 10 (Polyak–Łojasiewicz)** *There exists  $\mu > 0$  such that  $\|\nabla f(x)\|^2 \geq 2\mu(f(x) - f^*)$ , for all  $x \in \mathbb{R}^d$ .*

We now formulate a theorem that establishes the convergence of BiasedSGD for functions satisfying this assumption and Assumption 9.

**Theorem 4** *Let Assumptions 0, 9 and 10 hold. Choose a stepsize such that*

$$0 < \gamma < \min \left\{ \frac{\mu b}{L(A + \mu B)}, \frac{1}{\mu b} \right\}. \quad (21)$$

*Letting  $\delta^0 \stackrel{\text{def}}{=} f(x^0) - f^*$ , for every  $T \geq 1$ , we have*

$$\mathbb{E} [f(x^T) - f^*] \leq (1 - \gamma\mu b)^T \delta^0 + \frac{LC\gamma}{2\mu b} + \frac{c}{\mu b}. \quad (22)$$

When  $c = 0$ , the last term in (22) disappears, and we recover the best known rates under the Polyak–Łojasiewicz condition [Karimi et al., 2016], but under milder conditions (see Corollary 10 in the appendix). Further, if we set  $A = 0$ , we obtain a result that is slightly weaker than the one obtained by Ajallooeian and Stich [2020, Theorem 6], but under milder assumptions (cf. Biased ABC and BND in Figure 1; see also Claim 1).

## 6.3 Strongly convex case

**Assumption 11** *Let  $f$  be  $\mu$ -strongly-convex and continuously differentiable.*

| Theorem | Convergence rate                                                                                                                                                    | Compared to | Rate we compare to                                                                                                                            | Match? |
|---------|---------------------------------------------------------------------------------------------------------------------------------------------------------------------|-------------|-----------------------------------------------------------------------------------------------------------------------------------------------|--------|
| Thm 3   | $\mathcal{O}\left(\frac{\delta^0 L}{\varepsilon^2} \max\left\{B, \frac{12\delta^0 A}{\varepsilon^2}, \frac{2C}{\varepsilon^2}\right\}\right)$                       | 34-Thm 2    | $\mathcal{O}\left(\frac{\delta^0 L}{\varepsilon^2} \max\left\{B, \frac{12\delta^0 A}{\varepsilon^2}, \frac{2C}{\varepsilon^2}\right\}\right)$ | ✓      |
| Thm 3   | $\mathcal{O}\left(\max\left\{\frac{8(M+1)(m+1)}{(1-m)^2\varepsilon}, \frac{16(M+1)\varphi^2+2\sigma^2}{(1-m)^2\varepsilon^2}\right\}L\delta^0\right)$               | 1-Thm 4     | $\mathcal{O}\left(\max\left\{\frac{M+1}{(1-m)\varepsilon}, \frac{2\sigma^2}{(1-m)^2\varepsilon^2}\right\}L\delta^0\right)$                    | ✗      |
| Thm 3   | $\mathcal{O}\left(\max\left\{\frac{8Q}{\varepsilon^2 q^2}, \frac{4(U+u^2)}{\varepsilon q^2}\right\}L\delta^0\right)$                                                | 6-Thm 4.8   | $\mathcal{O}\left(\max\left\{\frac{8Q}{\varepsilon^2 q^2}, \frac{4(U+u^2)}{\varepsilon q^2}\right\}L\delta^0\right)$                          | ✓      |
| Thm 4   | $\tilde{\mathcal{O}}\left(\max\left\{\frac{2(M+1)(m+1)}{1-m}, \frac{2(M+1)\varphi^2+\sigma^2}{\varepsilon\mu(1-m)+2\varepsilon^2}\right\}\frac{\kappa}{1-m}\right)$ | 1-Thm 6     | $\tilde{\mathcal{O}}\left(\max\left\{(M+1), \frac{\sigma^2}{\varepsilon\mu(1-m)+\varphi^2}\right\}\frac{\kappa}{1-m}\right)$                  | ✗      |
| Thm 12  | $\tilde{\mathcal{O}}\left(\max\left\{2, \frac{L(U+u^2)}{q^2\mu}, \frac{LQ}{\varepsilon\mu^2 q^2}\right\}\right)$                                                    | 6-Thm 4.6   | $\tilde{\mathcal{O}}\left(\max\left\{2, \frac{L(U+u^2)}{q^2\mu}, \frac{LQ}{\varepsilon\mu^2 q^2}\right\}\right)$                              | ✓      |
| Thm 12  | $\tilde{\mathcal{O}}\left(\left(\frac{\beta^2}{\alpha}\right)^2 \frac{L}{\mu}\right)$                                                                               | 5-Thm 12    | $\tilde{\mathcal{O}}\left(\frac{\beta^2}{\alpha} \frac{L}{\mu}\right)$                                                                        | ✗      |
| Thm 12  | $\tilde{\mathcal{O}}\left(\left(\frac{\beta}{\tau}\right)^2 \frac{L}{\mu}\right)$                                                                                   | 5-Thm 13    | $\tilde{\mathcal{O}}\left(\frac{\beta}{\tau} \frac{L}{\mu}\right)$                                                                            | ✗      |
| Thm 12  | $\tilde{\mathcal{O}}\left(\delta^2 \frac{L}{\mu}\right)$                                                                                                            | 5-Thm 14    | $\tilde{\mathcal{O}}\left(\delta \frac{L}{\mu}\right)$                                                                                        | ✗      |

Table 4: Complexity comparison. We examine whether we can achieve the same convergence rate as obtained under stronger assumptions. In most cases, we ensure the same rate, albeit with inferior multiplicative factors due to the broader scope of the analysis. The notation  $\tilde{\mathcal{O}}(\cdot)$  hides a logarithmic factor of  $\log \frac{2\delta^0}{\varepsilon}$ .

Since Assumption 10 is more general than Assumption 11, Theorem 4 can be applied to functions that satisfy Assumption 11. If we set  $A = c = 0$ , we recover [Bottou et al., 2018, Theorem 4.6] (see Corollary 13 in the appendix). If  $A = C = c = 0$ , we retrieve results comparable to those in [Beznosikov et al., 2020, Theorems 12–14], up to a multiplicative factor (see Corollary 14 in the appendix). Due to  $\mu$ -strong convexity, our result (22) also implies an iterate convergence, since we have  $\|x^T - x^*\|^2 \leq \frac{2}{\mu} \mathbb{E}[f(x^T) - f(x^*)]$ . However, in this case an additional factor of  $\frac{2}{\mu}$  arises. Below we present a stronger result, yet, at a cost of imposing a stricter condition on the control variables from Assumption 9.

**Assumption 12** Let  $A, B, C$  and  $b$  be parameters from Assumption 9. Let  $\mu$  be a strong convexity constant. Let  $L$  be a smoothness constant. Suppose  $A + L(B + 1 - 2b) < \mu$  holds.

Under Assumptions 9 and 12 we establish a similar result as the one obtained by Hu et al. [2021a, Theorem 1]. The authors impose a restriction of  $\frac{1}{\kappa}$  from above on a constant with an analogous role as  $B + 1 - 2b$  in Assumptions 9 and 12 with  $A = 0$ . However, unlike us, the authors consider only a finite sum case which makes our result more general. Moreover, only a biased version of SGD with a simple sampling strategy is analyzed by Hu et al. [2021a]. Our results are applicable to a larger variety of gradient estimators and obtained under milder assumptions. Also, our proof strategy is different, and much simpler.

**Theorem 5** Let Assumptions 0, 9, 11 and 12 hold. For every positive  $s$ , satisfying  $A + L(B + 1 - 2b) < s < \mu$ , choose a stepsize  $\gamma$  such that

$$0 < \gamma \leq \min\left\{\frac{1 - \frac{1}{s}(A + L(B + 1 - 2b))}{A + LB}, \frac{1}{\mu - s}\right\}. \quad (23)$$

Then the iterates of BiasedSGD (Algorithm 1) for every  $T \geq 1$  satisfy

$$\mathbb{E}\left[\|x^T - x^*\|^2\right] \leq (1 - \gamma(\mu - s))^T \|x^0 - x^*\|^2 + \frac{\gamma C + \frac{C+2c}{s}}{\mu - s}. \quad (24)$$

In the standard result for (unbiased) SGD, the convergence neighborhood term has the form of  $\frac{\gamma C}{\mu}$ , and it can be controlled by adjusting the stepsize. However, due to the generality of our analysis in the biased case, in (24) we obtain an extra uncontrollable neighborhood term of the form  $\frac{C+2c}{s(\mu-s)}$ .

When  $A = C = c = 0$ ,  $B = 1$ ,  $b = 1$ ,  $s \rightarrow 0$ , we recover exactly the classical result for GD.

## 7 Experiments

**Datasets, Hardware, and Code Implementation.** The experiments utilized publicly available LibSVM datasets Chang and Lin [2011], specifically the `splice`, `a9a`, and `w8a`. These algorithms were developed using Python 3.8 and executed on a machine equipped with 48 cores of Intel(R) Xeon(R) Gold 6246 CPU @ 3.30GHz.

**Experiment: Problem Setting.** To validate our theoretical findings, we conducted a series of numerical experiments on a binary classification problem. Specifically, we employed logistic regression with a non-convex regularizer:

$$\min_{x \in \mathbb{R}^d} \left[ f(x) \stackrel{\text{def}}{=} \frac{1}{n} \sum_{i=1}^n f_i(x) \right], \text{ where } f_i(x) \stackrel{\text{def}}{=} \log(1 + \exp(-y_i a_i^\top x)) + \lambda \sum_{j=1}^d \frac{x_j^2}{1 + x_j^2},$$

and  $(a_i, y_i) \in \mathbb{R}^d \times \{-1, 1\}$ ,  $i = 1, \dots, n$  represent the training data samples. In all experiments, we set the regularization parameter  $\lambda$  to a fixed value of  $\lambda = 1$ . We use datasets from the open LibSVM library [Chang and Lin, 2011]. We examine the performance of the proposed **BiasedSGD** method with biased independent sampling without replacement (we call it **BiasedSGD-ind**) in various settings (see Definition 1). The primary goal of these numerical experiments is to demonstrate the alignment of our theoretical findings with the observed experimental results. To assess the performance of the methods throughout the optimization process, we monitor the metric  $\|\nabla f(x^t)\|^2$ , recomputed after every 10 iterations. The algorithms are terminated after completing 5000 iterations. For each method, we use the largest theoretical stepsize. Specifically, for **BiasedSGD-ind**, the stepsize is determined according to Corollary 4 and Claim 2 with  $\gamma = \min \left\{ \frac{1}{\sqrt{LAK}}, \frac{b}{LB}, \frac{c}{LC} \right\}$ , where  $c = 0$ ,  $A = \frac{\max_i L_i}{\min_i p_i}$ ,  $B = 0$ ,  $C = 2A\Delta^* + s^2$ ,  $b = \min_i p_i$  and  $s = 0$ .

More experimental details are provided in Appendix A.

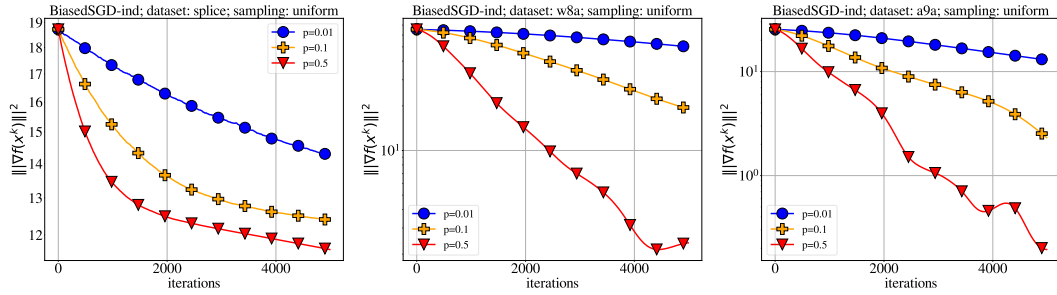

Figure 2: The performance of **BiasedSGD-ind** with different choices of probabilities.

**Experiment: The impact of the parameter  $p$  on the convergence behavior.** In the first experiment, we investigate how the convergence of **BiasedSGD-ind** is affected as we increase the probabilities  $p_i$ , while keeping them equal for all data samples. According to the Corollary 4, larger  $p_i$  values (resulting in an increase of the expected batch size) allow for a larger stepsize, which, in turn, improves the overall convergence. This behavior is evident in Figure 2. The experiment visualized in Figure 2 involves varying the probability parameter  $p$  within the set  $\{0.01, 0.1, 0.5\}$ . This manipulation directly influences the value of  $A$ , consequently affecting the theoretical stepsize  $\gamma$ . In the context of **BiasedSGD-ind**, the stepsize  $\gamma$  is defined as  $\frac{1}{\sqrt{LAK}}$ . A comprehensive compilation of these parameters is represented in Table 7.

## 8 Conclusion

In this work, we consolidate various recent assumptions regarding the convergence of **biasedSGD** and elucidate their implication relationships. Moreover, we introduce a weaker assumption, referred to as Biased ABC. We also demonstrate that Biased ABC encompasses stochastic gradient oracles that previous assumptions excluded. With this assumption, we provide a proof of **biasedSGD** convergence across multiple scenarios, including strongly convex, non-convex, and under the PL-condition. Convergence rates that we obtain are the same up to a constant factor due to the broader setting and in some cases they coincide with the rates obtained under stricter assumptions. Furthermore, we examine the most widely used estimators in the literature related to **SGD**, represent them within the context of our Biased ABC framework, and analyze their compatibility with all previous frameworks.

## Acknowledgements

This work of all authors was supported by the KAUST Baseline Research Scheme (KAUST BRF). The work of Y. Demidovich and P. Richtárik was supported by the KAUST Extreme Computing Research Center (KAUST ECRC), and the work of P. Richtárik was supported by the SDAIA-KAUST Center of Excellence in Data Science and Artificial Intelligence (SDAIA-KAUST AI).

## References

- Ahmad Ajalloeian and Sebastian U Stich. Analysis of SGD with biased gradient estimators. *arXiv preprint arXiv:2008.00051*, 2020.
- Alham Fikri Aji and Kenneth Heafield. Sparse communication for distributed gradient descent. In *Proceedings of the 2017 Conference on Empirical Methods in Natural Language Processing*, pages 440–445, Copenhagen, Denmark, 2017. Association for Computational Linguistics. doi: 10.18653/v1/D17-[]1045.
- Dan Alistarh, Torsten Hoefler, Mikael Johansson, Nikola Konstantinov, Sarit Khirirat, and Cedric Renggli. The convergence of sparsified gradient methods. In *Advances in Neural Information Processing Systems (NeurIPS)*, volume 31, pages 5973–5983, 2018.
- El Houcine Bergou, Eduard Gorbunov, and Peter Richtárik. Stochastic three points method for unconstrained smooth minimization. *SIAM Journal on Optimization*, 30(4):2726–2749, 2020.
- Aleksandr Beznosikov, Samuel Horváth, Peter Richtárik, and Mher Safaryan. On biased compression for distributed learning. *arXiv preprint arXiv:2002.12410*, 2020.
- Léon Bottou, Frank Curtis, and Jorge Nocedal. Optimization methods for large-scale machine learning. *SIAM Review*, 60(2):223–311, 2018.
- Soumia Bouchrouite, Grigory Malinovsky, Peter Richtárik, and EL Bergou. Minibatch stochastic three points method for unconstrained smooth minimization. *arXiv preprint arXiv:2209.07883*, 2022.
- Chih-Chung Chang and Chih-Jen Lin. LIBSVM: a library for support vector machines. *ACM Transactions on Intelligent Systems and Technology (TIST)*, 2(3):1–27, 2011.
- Congliang Chen, Li Shen, Haozhi Huang, and Wei Liu. Quantized Adam with error feedback. *ACM Transactions on Intelligent Systems and Technology (TIST)*, 12(5):1–26, 2021a.
- Pin-Yu Chen, Huan Zhang, Yash Sharma, Jinfeng Yi, and Cho-Jui Hsieh. ZOO: Zeroth order optimization based black-box attacks to deep neural networks without training substitute models. *Proceedings of the 10th ACM Workshop on Artificial Intelligence and Security*, pages 15–26, 2017.
- Tianyi Chen, Yuejiao Sun, and Wotao Yin. Closing the gap: Tighter analysis of alternating stochastic gradient methods for bilevel problems. In M. Ranzato, A. Beygelzimer, Y. Dauphin, P.S. Liang, and J. Wortman Vaughan, editors, *Advances in Neural Information Processing Systems*, volume 34, pages 25294–25307. Curran Associates, Inc., 2021b.
- Tianyi Chen, Yuejiao Sun, and Wotao Yin. Solving stochastic compositional optimization is nearly as easy as solving stochastic optimization. *IEEE Transactions on Signal Processing*, 69:4937–4948, 2021c. doi: 10.1109/TSP.2021.3092377.
- Tianyi Chen, Yuejiao Sun, and Wotao Yin. A single-timescale stochastic bilevel optimization method. *arXiv preprint arXiv:2102.04671*, 2021d.
- Laurent Condat, Kai Yi, and Peter Richtárik. EF-BV: A unified theory of error feedback and variance reduction mechanisms for biased and unbiased compression in distributed optimization. *Advances in Neural Information Processing Systems (NeurIPS)*, 2022.
- Jean-Baptiste Cordonnier. Convex optimization using sparsified stochastic gradient descent with memory. Technical report, 2018.

- Marina Danilova and Eduard Gorbunov. Distributed methods with absolute compression and error compensation. In *Mathematical Optimization Theory and Operations Research: Recent Trends: 21st International Conference, MOTOR 2022, Petrozavodsk, Russia, July 2–6, 2022, Revised Selected Papers*, pages 163–177. Springer, 2022.
- Alexandre d’Aspremont. Smooth optimization with approximate gradient. *SIAM Journal on Optimization*, 19(3):1171–1183, 2008.
- Olivier Devolder, François Glineur, and Yurii Nesterov. First-order methods of smooth convex optimization with inexact oracle. *Mathematical Programming*, 146(1-2):37–75, 2014.
- Aritra Dutta, El Houcine Bergou, Ahmed M Abdelmoniem, Chen-Yu Ho, Atal Narayan Sahu, Marco Canini, and Panos Kalnis. On the discrepancy between the theoretical analysis and practical implementations of compressed communication for distributed deep learning. In *Proceedings of the AAAI Conference on Artificial Intelligence*, volume 34, pages 3817–3824, 2020.
- Ilyas Fatkhullin, Igor Sokolov, Eduard Gorbunov, Zhize Li, and Peter Richtárik. EF21 with bells & whistles: practical algorithmic extensions of modern error feedback. *arXiv preprint arXiv:2110.03294*, 2021.
- Ian Goodfellow, Yoshua Bengio, and Aaron Courville. *Deep Learning*. The MIT Press, 2016.
- Eduard Gorbunov, Dmitry Kovalev, Dmitry Makarenko, and Peter Richtárik. Linearly converging error compensated SGD. *Advances in Neural Information Processing Systems*, 33:20889–20900, 2020.
- Robert Mansel Gower, Nicolas Loizou, Xun Qian, Alibek Sailanbayev, Egor Shulgin, and Peter Richtárik. SGD: General analysis and improved rates. In *International Conference on Machine Learning (ICML)*, pages 5200–5209. PMLR, 2019.
- Suyog Gupta, Ankur Agrawal, Kailash Gopalakrishnan, and Pritish Narayanan. Deep learning with limited numerical precision. In *International conference on machine learning*, pages 1737–1746. PMLR, 2015.
- Samuel Horváth, Chen-Yu Ho, Ludovít Horváth, Atal Narayan Sahu, Marco Canini, and Peter Richtárik. Natural compression for distributed deep learning. In *Mathematical and Scientific Machine Learning*, pages 129–141. PMLR, 2022.
- Bin Hu, Peter Seiler, and Laurent Lessard. Analysis of biased stochastic gradient descent using sequential semidefinite programs. *Mathematical Programming*, 187:383–408, 2021a.
- Yifan Hu, Xin Chen, and Niao He. Sample complexity of sample average approximation for conditional stochastic. *SIAM J. on Optimization*, 30(3):2103–2133, 2020a. ISSN 1052-6234. doi: 10.1137/19M1284865. URL <https://doi.org/10.1137/19M1284865>.
- Yifan Hu, Siqi Zhang, Xin Chen, and Niao He. Biased stochastic first-order methods for conditional stochastic optimization and applications in meta learning. In H. Larochelle, M. Ranzato, R. Hadsell, M.F. Balcan, and H. Lin, editors, *Advances in Neural Information Processing Systems*, volume 33, pages 2759–2770. Curran Associates, Inc., 2020b. URL [https://proceedings.neurips.cc/paper\\_files/paper/2020/file/1cdf14d1e3699d61d237cf76ce1c2dca- \[ \]Paper.pdf](https://proceedings.neurips.cc/paper_files/paper/2020/file/1cdf14d1e3699d61d237cf76ce1c2dca- [ ]Paper.pdf).
- Yifan Hu, Xin Chen, and Niao He. On the bias-variance-cost tradeoff of stochastic optimization. In M. Ranzato, A. Beygelzimer, Y. Dauphin, P.S. Liang, and J. Wortman Vaughan, editors, *Advances in Neural Information Processing Systems*, volume 34, pages 22119–22131. Curran Associates, Inc., 2021b. URL [https://proceedings.neurips.cc/paper\\_files/paper/2021/file/b986700c627db479a4d9460b75de7222- \[ \]Paper.pdf](https://proceedings.neurips.cc/paper_files/paper/2021/file/b986700c627db479a4d9460b75de7222- [ ]Paper.pdf).
- Kaiyi Ji, Junjie Yang, and Yingbin Liang. Theoretical convergence of multi-step model-agnostic meta-learning. 23(1), 2022. ISSN 1532-4435.
- Hamed Karimi, Julie Nutini, and Mark Schmidt. Linear convergence of gradient and proximal-gradient methods under the Polyak-Łojasiewicz condition. *Machine Learning and Knowledge Discovery in Databases*, pages 795—811, 2016.

- Sai Praneeth Karimireddy, Sebastian Stich, and Martin Jaggi. Adaptive balancing of gradient and update computation times using global geometry and approximate subproblems. *Proceedings of the 21st International Conference on Artificial Intelligence and Statistics (AISTATS)*, 2018.
- Sai Praneeth Karimireddy, Quentin Rebjock, Sebastian U. Stich, and Martin Jaggi. Error feedback fixes SignSGD and other gradient compression schemes. In *International Conference on Machine Learning (ICML)*, volume 97, pages 3252–3261, 2019.
- Ahmed Khaled and Peter Richtárik. Better theory for SGD in the nonconvex world. *Transactions on Machine Learning Research*, 2023. ISSN 2835-8856. URL <https://openreview.net/forum?id=AU4qHN2VkS>. Survey Certification.
- Sarit Khirirat, Hamid Reza Feyzmahdavian, and Mikael Johansson. Distributed learning with compressed gradients. *arXiv preprint arXiv:1806.06573*, 2018a.
- Sarit Khirirat, Mikael Johansson, and Dan Alistarh. Gradient compression for communication-limited convex optimization. In *2018 IEEE Conference on Decision and Control (CDC)*, pages 166–171. IEEE, 2018b.
- Sarit Khirirat, Sindri Magnússon, and Mikael Johansson. Compressed gradient methods with Hessian-aided error compensation. *IEEE Transactions on Signal Processing*, 69:998–1011, 2020.
- Sarit Khirirat, Sindri Magnússon, and Mikael Johansson. Eco-Fedsplit: Federated learning with error-compensated compression. In *ICASSP 2022-2022 IEEE International Conference on Acoustics, Speech and Signal Processing (ICASSP)*, pages 5952–5956. IEEE, 2022.
- Yunwei Lei, Ting Hu, Guiying Li, and Ke Tang. Stochastic Gradient Descent for nonconvex learning without bounded gradient assumptions. In *IEEE Transactions on Neural Networks and Learning Systems*, pages 1–7. ISSN 2162-2388, 2019.
- Rémi Leluc and François Portier. SGD with coordinate sampling: Theory and practice. *Journal of Machine Learning Research*, 23(342):1–47, 2022.
- Daniel Levy, Yair Carmon, John C. Duchi, and Aaron Sidford. Large-scale methods for distributionally robust optimization. In *Proceedings of the 34th International Conference on Neural Information Processing Systems*, Red Hook, NY, USA, 2020. Curran Associates Inc. ISBN 9781713829546.
- Sijia Liu, Bhavya Kailkhura, Pin-Yu Chen, Paishun Ting, Shiyu Chang, and Lisa Amini. Zeroth-order stochastic variance reduction for nonconvex optimization. *Advances in Neural Information Processing Systems (NeurIPS)*, 31:3727–3737, 2018.
- Konstantin Mishchenko, Bokun Wang, Dmitry Kovalev, and Peter Richtárik. IntSGD: Adaptive floatless compression of stochastic gradients. *arXiv preprint arXiv:2102.08374*, 2021.
- Seyed-Mohsen Moosavi-Dezfooli, Alhussein Fawzi, Omar Fawzi, and Pascal Frossard. Universal adversarial perturbations. In *Proceedings of the IEEE Conference on Computer Vision and Pattern Recognition (CVPR)*, 2017.
- Arkadi Nemirovsky and David Yudin. *Problem Complexity and Method Efficiency in Optimization*. Wiley, New York, 1983.
- Yurii Nesterov and Vladimir Spokoiny. Random gradient-free minimization of convex functions. *Foundations of Computational Mathematics*, 17(2):527–566, 2017.
- Feng Niu, Benjamin Recht, Christopher Re, and Stephen Wright. Hogwild: A lock-free approach to parallelizing Stochastic Gradient Descent. In *Advances in Neural Information Processing Systems (NeurIPS)*, volume 24, pages 693–701, 2011.
- Boris Polyak. Gradient methods for minimizing functionals. *U.S.S.R. Computational Mathematics and Mathematical Physics*, 3(4):864–878, 1963.
- Boris Polyak. *Introduction to Optimization*. OptimizationSoftware, Inc., 1987.

- Boris Polyak and Y.Z. Tsyppin. Pseudogradient adaptation and training algorithms. *Automation and Remote Control*, 34:377–397, 01 1973.
- Peter Richtárik and Martin Takáč. Stochastic reformulations of linear systems: Algorithms and convergence theory. *SIAM J. Matrix Anal. Appl.*, 41(2):487–524, 2020. ISSN 0895-4798.
- Peter Richtárik, Igor Sokolov, and Ilyas Fatkhullin. EF21: A new, simpler, theoretically better, and practically faster error feedback. In *Advances in Neural Information Processing Systems (NeurIPS)*, 2021.
- Peter Richtárik, Igor Sokolov, Elnur Gasanov, Ilyas Fatkhullin, Zhize Li, and Eduard Gorbunov. 3PC: Three point compressors for communication-efficient distributed training and a better theory for lazy aggregation. In *International Conference on Machine Learning (ICML)*, pages 18596–18648. PMLR, 2022.
- Herbert Robbins and Sutton Monro. A stochastic approximation method. *Annals of Mathematical Statistics*, 22:400–407, 1951.
- Atal Sahu, Aritra Dutta, Ahmed M Abdelmoniem, Trambak Banerjee, Marco Canini, and Panos Kalnis. Rethinking gradient sparsification as total error minimization. *Advances in Neural Information Processing Systems (NeurIPS)*, 34:8133–8146, 2021.
- Amedeo Sapio, Marco Canini, Chen-Yu Ho, Jacob Nelson, Panos Kalnis, Changhoon Kim, Arvind Krishnamurthy, Masoud Moshref, Dan Ports, and Peter Richtárik. Scaling distributed machine learning with in-network aggregation. In *In 18th USENIX Symposium on Networked Systems Design and Implementation (NSDI 21)*, pages 785–808, 2021.
- Mark Schmidt, Nicolas Roux, and Francis Bach. Convergence rates of inexact proximal-gradient methods for convex optimization. *Advances in Neural Information Processing Systems (NeurIPS)*, 24:1458–1466, 2011.
- Shai Shalev-Shwartz and Shai Ben-David. *Understanding Machine Learning: From Theory to Algorithms*. Cambridge University Press, 2014.
- Sebastian U Stich and Sai Praneeth Karimireddy. The error-feedback framework: Better rates for SGD with delayed gradients and compressed updates. *The Journal of Machine Learning Research*, 21(1):9613–9648, 2020.
- Sebastian U. Stich, J.-B. Cordonnier, and Martin Jaggi. Sparsified SGD with memory. In *Advances in Neural Information Processing Systems (NeurIPS)*, 2018.
- Nikko Ström. Scalable distributed dnn training using commodity GPU cloud computing. In *Inter-speech 2015*, 2015.
- Ruo-Yu Sun. Optimization for deep learning: An overview. *Journal of the Operations Research Society of China*, 8(2):249–294, 2020.
- Hanlin Tang, Xiangru Lian, Chen Yu, Tong Zhang, and Ji Liu. DoubleSqueeze: Parallel Stochastic Gradient Descent with double-pass error-compensated compression. In *Proceedings of the 36th International Conference on Machine Learning (ICML)*, 2020.
- Rachael Tappenden, Peter Richtárik, and Jacek Gondzio. Inexact coordinate descent: Complexity and preconditioning. *Journal of Optimization Theory and Applications*, 170:144–176, 2016.
- Jie Wang, Rui Gao, and Yao Xie. Sinkhorn distributionally robust optimization. *arXiv preprint arXiv:2109.11926*, 2021.
- Jianqiao Wangni, Jialei Wang, Ji Liu, and Tong Zhang. Gradient sparsification for communication-efficient distributed optimization. In *Advances in Neural Information Processing Systems (NeurIPS)*, volume 31, pages 1306–1316, 2018.

## Contents

|          |                                                                       |           |
|----------|-----------------------------------------------------------------------|-----------|
| <b>1</b> | <b>Introduction</b>                                                   | <b>1</b>  |
| <b>2</b> | <b>Sources of bias</b>                                                | <b>2</b>  |
| <b>3</b> | <b>Contributions</b>                                                  | <b>3</b>  |
| <b>4</b> | <b>Existing models of biased gradient estimators</b>                  | <b>4</b>  |
| <b>5</b> | <b>New approach: biased ABC assumption</b>                            | <b>6</b>  |
| 5.1      | Brief history . . . . .                                               | 6         |
| 5.2      | Biased ABC as the weakest assumption . . . . .                        | 6         |
| <b>6</b> | <b>Convergence of biased SGD under the biased ABC assumption</b>      | <b>7</b>  |
| 6.1      | General nonconvex case . . . . .                                      | 8         |
| 6.2      | Convergence under PL-condition . . . . .                              | 8         |
| 6.3      | Strongly convex case . . . . .                                        | 8         |
| <b>7</b> | <b>Experiments</b>                                                    | <b>9</b>  |
| <b>8</b> | <b>Conclusion</b>                                                     | <b>10</b> |
| <b>A</b> | <b>Experiments: missing details</b>                                   | <b>18</b> |
| <b>B</b> | <b>Sources of bias: further discussion and new estimators</b>         | <b>18</b> |
| <b>C</b> | <b>Known gradient estimators in biased ABC framework</b>              | <b>21</b> |
| <b>D</b> | <b>Relations between assumptions 1–9</b>                              | <b>24</b> |
| D.1      | Counterexamples to Figure 1 . . . . .                                 | 24        |
| D.2      | Implications in Figure 1 . . . . .                                    | 28        |
| D.2.1    | Proof of Claim 1 . . . . .                                            | 33        |
| <b>E</b> | <b>General nonconvex case: history and corollaries from Theorem 3</b> | <b>34</b> |
| E.1      | Known results . . . . .                                               | 34        |
| E.2      | Corollaries from Theorem 3 . . . . .                                  | 35        |
| E.3      | Proof of Corollary 3 . . . . .                                        | 36        |
| E.4      | Key lemma . . . . .                                                   | 37        |
| E.5      | Proof of Theorem 3 . . . . .                                          | 37        |
| E.6      | Proof of Corollary 4 . . . . .                                        | 38        |
| E.7      | Proof of Corollary 5 . . . . .                                        | 38        |
| E.8      | Proof of Corollary 6 . . . . .                                        | 38        |
| E.9      | Proof of Corollary 7 . . . . .                                        | 39        |
| E.10     | Proof of Corollary 8 . . . . .                                        | 39        |

|          |                                                                       |           |
|----------|-----------------------------------------------------------------------|-----------|
| <b>F</b> | <b>Convergence under PL-condition (assumption 10)</b>                 | <b>39</b> |
| F.1      | Corollaries from Theorem 4 . . . . .                                  | 40        |
| F.2      | Proof of Theorem 4. . . . .                                           | 40        |
| F.3      | Proof of Corollary 9 . . . . .                                        | 41        |
| F.4      | Proof of Corollary 10 . . . . .                                       | 41        |
| F.5      | Proof of Corollary 11 . . . . .                                       | 42        |
| <b>G</b> | <b>Strongly convex case</b>                                           | <b>42</b> |
| G.1      | Known results for convergence in function values . . . . .            | 42        |
| G.2      | Convergence in function values: our results . . . . .                 | 43        |
| G.3      | Proof of Corollary 12 . . . . .                                       | 44        |
| G.4      | Proof of Theorem 12 . . . . .                                         | 44        |
| G.5      | Proof of Corollary 13 . . . . .                                       | 45        |
| G.6      | Proof of Corollary 14 . . . . .                                       | 45        |
| G.7      | Iterate convergence: further discussion . . . . .                     | 45        |
| G.8      | Proof of Theorem 5 . . . . .                                          | 46        |
| <b>H</b> | <b>Assumptions 1–8 in biased ABC framework</b>                        | <b>47</b> |
| <b>I</b> | <b>New estimators in biased ABC framework: proofs for Section B</b>   | <b>48</b> |
| I.1      | Proof of Claim 2 . . . . .                                            | 48        |
| I.2      | Proof of Claim 3 . . . . .                                            | 49        |
| I.3      | Proof of Claim 4 . . . . .                                            | 50        |
| <b>J</b> | <b>Known estimators in biased ABC framework: proofs for Section C</b> | <b>51</b> |
| J.1      | Proof of Claim 5 . . . . .                                            | 51        |
| J.2      | Proof of Claim 6 . . . . .                                            | 52        |
| J.3      | Proof of Claim 7 . . . . .                                            | 52        |
| J.4      | Proof of Claim 8 . . . . .                                            | 52        |
| J.5      | Proof of Claim 9 . . . . .                                            | 52        |
| J.6      | Proof of Claim 10 . . . . .                                           | 53        |
| J.7      | Proof of Claim 11 . . . . .                                           | 53        |
| J.8      | Proof of Claim 12 . . . . .                                           | 53        |
| J.9      | Proof of Claim 13 . . . . .                                           | 53        |
| J.10     | Proof of Claim 14 . . . . .                                           | 53        |
| J.11     | Proof of Claim 15 . . . . .                                           | 53        |
| J.12     | Proof of Claim 16 . . . . .                                           | 54        |
| J.13     | Proof of Claim 17 . . . . .                                           | 54        |
| J.14     | Proof of Claim 18 . . . . .                                           | 54        |
| J.15     | Proof of Claim 19 . . . . .                                           | 54        |
| J.16     | Proof of Claim 20 . . . . .                                           | 54        |

|          |                                                                             |           |
|----------|-----------------------------------------------------------------------------|-----------|
| <b>K</b> | <b>Proofs of the results presented in Table 3</b>                           | <b>55</b> |
| <b>L</b> | <b>Relation between assumption 3 and contractive compression</b>            | <b>58</b> |
| <b>M</b> | <b>Relation between Assumption 7 and absolute compression</b>               | <b>58</b> |
| <b>N</b> | <b>Relations between the estimators from Assumptions 1–3</b>                | <b>58</b> |
| <b>O</b> | <b>Equivalence of Assumption 6 and [Ajalloeian and Stich, 2020, Def. 1]</b> | <b>59</b> |
| <b>P</b> | <b>Proof of Lemma 1</b>                                                     | <b>59</b> |
| <b>Q</b> | <b>Young’s inequality</b>                                                   | <b>60</b> |

## A Experiments: missing details

This section completes the experimental details mentioned in Section 7. The corresponding code can be found in the provided repository: [https://github.com/IgorSokoloff/guide-\[\]biased-\[\]sgd-\[\]experiments](https://github.com/IgorSokoloff/guide-[]biased-[]sgd-[]experiments). A summarized description of the datasets is available in Table 5.

Table 5: Summary of the datasets

| Dataset | $n$ (dataset size) | $d$ (# of features) |
|---------|--------------------|---------------------|
| splice  | 1000               | 60                  |
| a9a     | 32560              | 123                 |
| w8a     | 49749              | 300                 |

**Hyperparameters.** For the selected logistic regression problem, the smoothness constants  $L$  and  $L_i$  of the functions  $f$  and  $f_i$  were explicitly calculated as shown below:

$$\begin{aligned} L &= \lambda_{\max} \left( \frac{1}{4m} \mathbf{A}^\top \mathbf{A} + 2\lambda \mathbf{I} \right) \\ L_i &= \lambda_{\max} \left( \frac{1}{4} a_i a_i^\top + 2\lambda \mathbf{I} \right). \end{aligned}$$

In the above equations,  $\mathbf{A}$  represents the dataset (data matrix), and  $a_i$  signifies its  $i$ -th row. Smoothness constants for the logistic regression objective on the selected datasets are presented in Table 6.

Table 6: Smoothness Constants for Logistic Regression with  $\lambda = 1$

| Dataset | $L$   | $L_{\max}$ |
|---------|-------|------------|
| w8a     | 1.66  | 29.5       |
| a9a     | 2.57  | 4.5        |
| splice  | 97.83 | 163.25     |

Each method utilized the largest possible theoretical stepsize. For the **BiasedSGD-ind** method, the stepsize is determined based on Corollary 4 and Claim 2 with  $\gamma = \min \left\{ \frac{1}{\sqrt{LAK}}, \frac{b}{LB}, \frac{c}{LC} \right\}$ , where  $c = 0$ ,  $A = \frac{\max_i L_i}{\min_i p_i}$ ,  $B = 0$ ,  $C = 2A\Delta^* + s^2$ ,  $b = \min_i p_i$  and  $s = 0$ .

**Experiment: The impact of the parameter  $p$  on the convergence behavior (extra details).** The experiment visualized in Figure 2 involves varying the probability parameter  $p$  within the set  $\{0.01, 0.1, 0.5\}$ . This manipulation directly influences the value of  $A$ , consequently affecting the theoretical stepsize  $\gamma$ . In the context of **BiasedSGD-ind**, the stepsize  $\gamma$  is defined as  $\frac{1}{\sqrt{LAK}}$ . A comprehensive compilation of these parameters is represented in Table 7.

## B Sources of bias: further discussion and new estimators

In Section 2 of the main part of the paper we describe different sources of bias and provide general forms of estimators that arise in each scenario. However, we do not present any concrete practical examples of stochastic gradients. In this section we define several important realistic estimators and characterize them in terms of Biased ABC framework. For proofs of results in this section, see Section I.

For a finite-sum problem 1, consider a setting when the bias is induced by a subsampling strategy of which we lack the information. Let us introduce (without aiming to be exhaustive) a specific (and practical) sampling distribution and an estimator, which satisfies Assumption 9.

Table 7: Parameters  $A$  and theoretical stepsizes, determined by the choice of parameter  $p$  and dataset

| Dataset | $p$  | $A$     | Theoretical stepsize for BiasedSGD-ind<br>$\gamma = \min \frac{1}{\sqrt{LAK}}$ |
|---------|------|---------|--------------------------------------------------------------------------------|
| splice  | 0.01 | 16325.0 | $3.54 \cdot 10^{-4}$                                                           |
|         | 0.1  | 1632.5  | $1.12 \cdot 10^{-3}$                                                           |
|         | 0.5  | 326.5   | $2.50 \cdot 10^{-3}$                                                           |
| a9a     | 0.01 | 550.0   | $1.01 \cdot 10^{-2}$                                                           |
|         | 0.1  | 55.0    | $3.19 \cdot 10^{-2}$                                                           |
|         | 0.5  | 11.0    | $7.13 \cdot 10^{-2}$                                                           |
| w8a     | 0.01 | 3050.0  | $4.96 \cdot 10^{-3}$                                                           |
|         | 0.1  | 305.0   | $1.57 \cdot 10^{-2}$                                                           |
|         | 0.5  | 61.0    | $3.51 \cdot 10^{-2}$                                                           |

**Definition 1 (Biased independent sampling without replacement)** Let  $p_1, p_2, \dots, p_n$  be probabilities,  $0 < p_i \leq 1$  for all  $i \in [n]$ ,  $\sum_{i=1}^n p_i \in (0, n]$ . For every  $i \in [n]$ , define a random set as follows:

$$S_i = \begin{cases} \{i\} & \text{with probability } p_i, \\ \emptyset & \text{with probability } 1 - p_i. \end{cases}$$

Define a random subset  $S \subseteq [n]$  by taking the union of these random sets:  $S \stackrel{\text{def}}{=} \bigcup_{i=1}^n S_i$ . Put

$$\mathbb{I}_{i \in S} = \begin{cases} 1, & i \in S, \\ 0, & \text{otherwise.} \end{cases} \quad (25)$$

For every  $i \in [n]$ , define  $v_i = \frac{\mathbb{I}_{i \in S}}{|S|}$ . Let  $g(x) = \tilde{g}(x) + X$ , where

$$\tilde{g}(x) = \frac{1}{|S|} \sum_{i=1}^n \mathbb{I}_i \nabla f_i(x),$$

and  $X$  is a random variable independent of  $S$ , such that  $\mathbb{E}[X] = 0$ ,  $\mathbb{V}[X] = s^2$ .

The practical setting where this stochastic gradient might be useful can have the following structure. There is an oracle that, for every  $i \in [n]$ , decides with an unknown probability  $p_i$  whether to provide the information of  $\nabla f_i$  at the iteration  $k$  or not. Since the probabilities  $p_i$  are unknown, they may be substituted for their estimators  $\mathbb{I}_i$ . The stochastic gradient is then calculated as a simple average of all gradients with these estimators as weights. Note that a setting with  $\sum_{i=1}^n p_i = 1$  corresponds to the single-machine setup.

The subsampling strategy from Definition 1 can be used in another practical scenario. Consider a situation where access to the entire dataset is not available. In such cases, a *fixed batch strategy* can be employed. This strategy involves sampling a single batch  $S$  at step 0 and subsequently using it throughout the entire optimization process.

In the proof of Theorem 2 (parts viii and ix), we demonstrate that in a very simple setting the stochastic gradient from Definition 1 does not satisfy Assumptions 6 and 8 (and, therefore, to any other assumption from Section 4). We want to show that under very mild restrictions on functions  $f_i$ ,  $g(x)$  satisfies Biased ABC assumption.

**Assumption 13** Each  $f_i$  is bounded from below by  $f_i^*$  and  $L_i$ -smooth. That is, for all  $x, y \in \mathbb{R}^d$ , we have

$$f_i(y) \leq f_i(x) + \langle \nabla f_i(x), y - x \rangle + \frac{L_i}{2} \|y - x\|^2.$$

Here and many times below in the paper we rely on the following important lemma.

**Lemma 1** Let  $f$  be a function for which Assumption 0 is satisfied. Then, for all  $x \in \mathbb{R}^d$ , we have

$$\|\nabla f(x)\|^2 \leq 2LD_f(x, x^*).$$

In the nonconvex case the expression takes the following form:

$$\|\nabla f(x)\|^2 \leq 2L(f(x) - f^*), \quad \forall x \in \mathbb{R}^d.$$

This lemma appears in [Khaled and Richtárik, 2023] and in several recent works on the convergence of SGD. We give its proof in Section P. Equipped with Lemma 1, we can prove the following claim that motivates the inclusion of a Bregman Divergence term in (19). The reason why biased sampling gradient estimator does not satisfy Assumptions 1, 6 and 8 is because its variance contains a sum of squared client gradient norms, which, in general, can not be bounded in terms of the squared norm of the full gradient. In fact, for a variety of biased sampling estimators this obstacle may occur, and this additionally motivates establishing new theory under the general assumption proposed in the present paper.

**Claim 2** *Suppose Assumptions 0 and 13 hold. Let*

$$\Delta^* \stackrel{\text{def}}{=} \frac{1}{n} \sum_{i=1}^n (f^* - f_i^*). \quad (26)$$

*Then, gradient estimator from Definition 1 satisfies Assumption 9 with  $b = \min_i \{p_i\}$ ,  $c = 0$ ,*

$$A = \frac{\max_i \{L_i\}}{\min_i p_i}, \quad B = 0, \quad C = 2A\Delta^* + s^2.$$

In [Khaled and Richtárik, 2023], for a finite-sum problem (1), in the unbiased case the following general stochastic gradient is considered. Given a sampling vector  $v \in \mathbb{R}^d$  drawn from some distribution  $\mathcal{D}$  (where a sampling vector is one such that  $\mathbb{E}_{\mathcal{D}}[v_i] = c_i$ ,  $c_i \geq 0$ , for all  $i \in [n]$ ), for  $x \in \mathbb{R}^d$ , define the stochastic gradient  $g(x) \stackrel{\text{def}}{=} \frac{1}{n} \sum_{i=1}^n v_i \nabla f_i(x)$ . We do not require  $v_i$  to cause unbiasedness. Under mild assumptions on functions  $f_i$  and the sampling vectors  $v_i$ , we prove that  $g(x)$  satisfies Biased ABC assumption, for all non-degenerate distributions  $\mathcal{D}$ .

**Claim 3** *Suppose Assumption 13 holds and, for all  $i \in [n]$ , we have  $\mathbb{E}[v_i^2] < \infty$ . Then Assumption 9 holds for  $g(x)$  with  $A = \max_i \{L_i \mathbb{E}[v_i^2]\}$ ,  $B = 0$ ,  $C = 2A\Delta^*$ ,  $b = \min_i \{c_i\}$ ,  $c = 0$ .*

Note, that in [Khaled and Richtárik, 2023, Proposition 2] it is proven that  $\Delta^* \geq 0$ . The requirement of  $\mathbb{E}[v_i^2] < \infty$  is very weak and satisfied for almost all practical subsampling schemes in the literature. However, the generality of Claim 3 comes at a cost since it leads to very pessimistic choices of constants in Assumption 9.

Our framework is general enough to establish the convergence of biased stochastic gradient quantization or compression schemes. Consider the finite-sum problem (1) and let us propose the following new practical biased gradient estimator.

**Definition 2 (Distributed general biased rounding)** *Let  $\{a_k\}_{k \in \mathbb{Z}}$  be an arbitrary increasing sequence of positive numbers such that  $\inf_k \{a_k\} = 0$ , and  $\sup_k \{a_k\} = \infty$ . Then, for all  $j \in [n]$ ,  $i \in [d]$ , define*

$$\tilde{g}_j(x)_i \stackrel{\text{def}}{=} \text{sign}(\nabla f(x)_i) \arg \min_{y \in \{a_k\}} |y - |\nabla f(x)_i||, \quad i \in [d].$$

*For every  $j \in [n]$ , define mutually independent random variables*

$$\mathbb{I}_j = \begin{cases} 1, & \text{with probability } 0 < p_j < 1, \\ 0, & \text{with probability } 1 - p_j. \end{cases}$$

*For every  $x \in \mathbb{R}^d$ , define a gradient estimator*

$$g(x) = \frac{1}{n} \sum_{j=1}^n (\mathbb{I}_j \tilde{g}_j(x) + (1 - \mathbb{I}_j) \nabla f_j(x)).$$

The practical setting where  $g(x)$  might be used is a distributed problem where client node  $j \in [n]$  decides with probability  $p_j$  whether to send the compressed gradient or not. Master nodes which

does not know  $p_j$  simply averages the received stochastic gradients. In this case we preserve more information in comparison to the setting when we use compression at every step. On the other hand, gradients are compressed with positive probability, and we diminish the communication complexity versus the setting without any compression. That is, we have a flexible setting which is useful in practice.

As before, we prove that  $g(x)$  satisfies Biased ABC assumption under very mild conditions.

**Claim 4** *Suppose Assumption 13 holds and, for all  $i \in [n]$ , we have  $\mathbb{E}[v_i^2] < \infty$ . Then the distributed general biased rounding estimator  $g(x)$  satisfies Assumption 9 with*

$$A = A_r \stackrel{\text{def}}{=} \frac{2}{n} \max_j \{L_j\} \max_j \{p_j(1-p_j)\} \left( \left( \sup_{k \in \mathbb{Z}} \frac{2a_{k+1}}{a_k + a_{k+1}} \right)^2 + 1 \right), \quad (27)$$

$$B = B_r \stackrel{\text{def}}{=} 2 \max_j \{p_j^2\} \left( \left( \sup_{k \in \mathbb{Z}} \frac{2a_{k+1}}{a_k + a_{k+1}} \right)^2 + 1 \right), \quad (28)$$

$$C = C_r \stackrel{\text{def}}{=} \frac{4}{n} \max_j \{L_j\} \max_j \{p_j(1-p_j)\} \left( \left( \sup_{k \in \mathbb{Z}} \frac{2a_{k+1}}{a_k + a_{k+1}} \right)^2 + 1 \right) \Delta^*, \quad (29)$$

$$b = b_r \stackrel{\text{def}}{=} \max_j \{p_j\} \cdot \inf_{k \in \mathbb{Z}} \frac{2a_k}{a_k + a_{k+1}} + \max_j \{1-p_j\} \quad (30)$$

$$c = c_r = 0. \quad (31)$$

From Claims 2, 3 and 4 we see that, in fact, Biased ABC is not an additional assumption, but an inequality that is automatically satisfied under such settings.

One of the simplest models of bias is the case of additive noise, that is

$$g(x) = \nabla f(x) + \mathcal{Z},$$

where  $\mathcal{Z}$  is a random variable satisfying  $\mathbb{E}[\mathcal{Z}] = a$ ,  $a \in \mathbb{R}^d$ ,  $\mathbb{E}[\|\mathcal{Z}\|^2] = \sigma^2$ ,  $\sigma \in \mathbb{R}$ . It may happen in practise that, e.g., during the communication process in the distributed setting of the finite-sum problem (1) transmitted gradients become noisy, and this simple model captures such a scenario. Models of this type were previously analyzed in [Ajallooeian and Stich, 2020]. Clearly, BND assumption is satisfied. It means (see Figure 1), that they are covered by Biased ABC framework as well. However, models of this type impose rather strong restrictions on the stochastic gradient: they fail to capture a multiplicative biased noise that arises in the case of gradient compression operators and are not suitable for simulating subsampling schemes.

## C Known gradient estimators in biased ABC framework

In this section we define several known biased gradient estimators and for each of them, we present values of control variables  $A, B, C, b, c$  within our Biased ABC framework. Also, these values are shown in Table 8 for convenience of the reader. Formal proofs can be found in Section J. In Table 9 we demonstrate a summary on inclusion of each estimator from this section into every framework from Section 4.

**Definition 3 (Top- $k$  sparsifier – Aji and Heafield [2017]; Alistarh et al. [2018])** *Let gradient estimator  $g(x)$  be defined as*

$$g(x) \stackrel{\text{def}}{=} \sum_{i=d-k+1}^d (\nabla f(x))_{(i)} e_{(i)}, \quad \forall x \in \mathbb{R}^d,$$

where coordinates are ordered with respect to their absolute values:

$$|(\nabla f(x))_{(1)}| \leq |(\nabla f(x))_{(2)}| \leq \dots \leq |(\nabla f(x))_{(d)}|.$$

**Claim 5** *Top- $k$  sparsifier  $g(x)$  satisfies Assumption 9 with  $b = \frac{k}{d}$ ,  $c = 0$ ,  $A = 0$ ,  $B = 1$ ,  $C = 0$ .*

**Definition 4 (Rand- $k$  – Stich et al. [2018])** For every  $x \in \mathbb{R}^d$ , let

$$g(x) \stackrel{\text{def}}{=} \frac{d}{k} \sum_{i \in S} (\nabla f(x))_i e_i,$$

where  $S$  is a random subset of  $[d]$  chosen uniformly.

**Claim 6** Rand- $k$  estimator  $g(x)$  satisfies Assumption 9 with  $A = 0$ ,  $B = \frac{d}{k}$ ,  $C = 0$ ,  $b = 1$ ,  $c = 0$ .

**Definition 5 (Biased Rand- $k$  sparsifier – Beznosikov et al. [2020])** For every  $x \in \mathbb{R}^d$ , let

$$g(x) \stackrel{\text{def}}{=} \sum_{i \in S} (\nabla f(x))_i e_i,$$

where  $S$  is a random subset of  $[d]$  chosen uniformly.

**Claim 7** Biased Rand- $k$  sparsifier  $g(x)$  satisfies Assumption 9 with  $b = \frac{k^2}{d^2}$ ,  $c = 0$ ,  $A = C = 0$ ,  $B = \frac{k}{d}$ .

**Definition 6 (Adaptive random sparsification – Beznosikov et al. [2020])** Adaptive random sparsification estimator is defined via

$$g(x) \stackrel{\text{def}}{=} (\nabla f(x))_i e_i \quad \text{with probability} \quad \frac{|(\nabla f(x))_i|}{\|\nabla f(x)\|_1}$$

**Claim 8** Adaptive random sparsifier  $g(x)$  satisfies Assumption 9 with  $A = C = c = 0$ ,  $B = 1$ ,  $b = \frac{1}{d}$ .

**Definition 7 (General unbiased rounding estimator – Beznosikov et al. [2020])** Let  $\{a_k\}_{k \in \mathbb{Z}}$  be an arbitrary increasing sequence of positive numbers such that  $\inf_k a_k = 0$ ,  $\sup_k a_k = \infty$ . Define the rounding estimator  $g(x)$  in the following way: if  $a_k \leq |\nabla f(x)_i| \leq a_{k+1}$ , for a coordinate  $i \in [d]$ , then

$$g(x)_i = \begin{cases} \text{sign}(\nabla f(x)_i) a_k, & \text{with probability } \frac{a_{k+1} - |\nabla f(x)_i|}{a_{k+1} - a_k}, \\ \text{sign}(\nabla f(x)_i) a_{k+1}, & \text{with probability } \frac{|\nabla f(x)_i| - a_k}{a_{k+1} - a_k}. \end{cases}$$

Put

$$Z \stackrel{\text{def}}{=} \sup_{k \in \mathbb{Z}} \left( \frac{a_k}{a_{k+1}} + \frac{a_{k+1}}{a_k} + 2 \right). \quad (32)$$

**Claim 9** General unbiased rounding estimator  $g(x)$  satisfies Assumption 9 with  $A = C = c = 0$ ,  $B = \frac{Z}{4}$ ,  $b = 1$ .

**Definition 8 (General biased rounding – Beznosikov et al. [2020])** Let  $(a_k)_{k \in \mathbb{Z}}$  be an arbitrary increasing sequence of positive numbers such that  $\inf a_k = 0$  and  $\sup a_k = \infty$ . Then general biased rounding is defined via

$$g(x)_i \stackrel{\text{def}}{=} \text{sign}((\nabla f(x))_i) \arg \min_{t \in (a_k)} |t - |(\nabla f(x))_i||, \quad i \in [d].$$

Put

$$F = \sup_{k \in \mathbb{Z}} \frac{2a_{k+1}}{a_k + a_{k+1}}, \quad G = \inf_{k \in \mathbb{Z}} \frac{2a_k}{a_k + a_{k+1}}. \quad (33)$$

**Claim 10** General biased rounding estimator  $g(x)$  satisfies Assumption 9 with  $A = C = c = 0$ ,  $B = F^2$ ,  $b = \frac{G^2}{F}$ .

**Definition 9 (Natural compression – Horváth et al. [2022])** Natural compression estimator  $g_{\text{nat}}(x)$  is the special case of general unbiased rounding operator (see Definition 7) when  $a_k = 2^k$ ,  $k \in \mathbb{N}$ .

**Claim 11** *Natural compression estimator  $g(x)$  satisfies Assumption 9 with  $A = C = c = 0$ ,  $B = \frac{9}{8}$ ,  $b = 1$ .*

**Definition 10 (General exponential dithering – Beznosikov et al. [2020])** *For  $a > 1$ , define general exponential dithering estimator with respect to  $\ell_p$ -norm and with  $s$  exponential levels  $0 < a^{1-s} < a^{2-s} < \dots < a^{-1} < 1$  via*

$$(g(x))_i \stackrel{\text{def}}{=} \|\nabla f(x)\|_p \times \text{sign}((\nabla f(x))_i) \times \xi \left( \frac{|(\nabla f(x))_i|}{\|\nabla f(x)\|_p} \right),$$

*where the random variable  $\xi(t)$  for  $t \in [a^{-u-1}, a^{-u}]$  is set to either  $a^{-u-1}$  or  $a^{-u}$  with probabilities proportional to  $a^{-u} - t$  and  $t - a^{-u-1}$ , respectively.*

Put  $r = \min(p, 2)$  and

$$H_a = \frac{1}{4} \left( a + \frac{1}{a} + 2 \right) + d^{\frac{1}{r}} a^{1-s} \min \left( 1, d^{\frac{1}{r}} a^{1-s} \right) \quad (34)$$

**Claim 12** *General exponential dithering estimator  $g(x)$  satisfies Assumption 9 with  $A = C = c = 0$ ,  $B = H_a$ ,  $b = 1$ , where  $H_a$  is defined in (34).*

**Definition 11 (Natural dithering – Horváth et al. [2022])** *Natural dithering without norm compression is the special case of general exponential dithering when  $a = 2$  (see Definition 10).*

**Claim 13** *Natural dithering estimator satisfies Assumption 9 with  $A = C = c = 0$ ,  $B = H_2$ ,  $b = 1$ .*

**Definition 12 (Composition of Top- $k$  with exponential dithering – Beznosikov et al. [2020])**

*Let  $g_{\text{top}}(x)$  be the Top- $k$  sparsification operator (see Definition 3) and  $g_{\text{dith}}(x)$  be general exponential dithering operator with some base  $a > 1$  and parameter  $H_a$  from (34). Define a new compression operator as the composition of these two:*

$$g(x) \stackrel{\text{def}}{=} g_{\text{dith}}(g_{\text{top}}(x)).$$

In this definition we imply that the dithering operator is applied to the vector yielded after Top- $k$  sparsification, not to the gradient as it was defined.

**Claim 14** *Composition of Top- $k$  with exponential dithering estimator  $g(x)$  satisfies Assumption 9 with  $A = C = c = 0$ ,  $B = H_a^2$ ,  $b = \frac{k}{dH_a}$ .*

**Definition 13 (Gaussian smoothing – Polyak [1987])** *The following zero-order stochastic gradient, which we call Gaussian smoothing as in [Ajallooeian and Stich, 2020], is defined as*

$$g_{GS}(x) = \frac{f(x + \tau z) - f(x)}{\tau} \cdot z,$$

*where  $\tau > 0$  is a smoothing parameter, and  $z \sim \mathcal{N}(0, I)$  is a random Gaussian vector.*

**Claim 15** *Gaussian smoothing estimator  $g(x)$  satisfies Assumption 9 with*

$$\begin{aligned} A = A_{GS} &\stackrel{\text{def}}{=} 0, \quad B = B_{GS} \stackrel{\text{def}}{=} 2(d+4), \quad C = C_{GS} \stackrel{\text{def}}{=} \frac{\tau^2}{2} L^2 (d+6)^3, \\ b = b_{GS} &= \frac{1}{2}, \quad c = c_{GS} \stackrel{\text{def}}{=} \frac{\tau^2}{8} L^2 (d+3)^3. \end{aligned} \quad (35)$$

**Definition 14 (Hard-threshold sparsifier – Sahu et al. [2021])** *For some  $w \geq 0$ , define the estimator  $g_{HT}^w(x)$  as*

$$(g_{HT}^w(x))_i = \begin{cases} (\nabla f(x))_i, & |(\nabla f(x))_i| \geq w, \\ 0, & \text{otherwise,} \end{cases}$$

*for every  $i \in [d]$ .*

**Claim 16** *Hard-threshold estimator satisfies Assumption 9 with  $A = C = 0$ ,  $B = 1$ ,  $b = 1$ ,  $c = w^2 d$ .*

**Definition 15 (Scaled integer rounding – Sapio et al. [2021])** *In a distributed setting (2), for every  $i \in [n]$ , let  $\mathcal{C}_i : \nabla f_i(x) \rightarrow \frac{1}{\chi} R(\chi \nabla f_i(x))$ , where  $\chi > 0$  is a scaling factor,  $R$  is a rounding to the nearest integer operator. That is, a scaling integer rounding estimator is defined as*

$$g(x) = \frac{1}{n} \sum_{i=1}^n \frac{1}{\chi} R(\chi \nabla f_i(x)).$$

**Claim 17** *Scaling integer estimator satisfies Assumption 9 with  $A = 0$ ,  $B = 2$ ,  $C = \frac{2d}{\chi^2}$ ,  $b = \frac{1}{2}$ ,  $c = \frac{d}{2\chi^2}$ .*

**Definition 16 (Biased dithering – Khirirat et al. [2018b])** *Biased dithering estimator  $g(x)$  is defined as*

$$(g(x))_i = \|\nabla f(x)\| \text{sign}((\nabla f(x))_i), \quad i \in [d], \quad \forall x \in \mathbb{R}^d.$$

**Claim 18** *Biased dithering operator satisfies Assumption 9 with  $A = 0$ ,  $B = d$ ,  $C = 0$ ,  $b = 1$ ,  $c = 0$ .*

**Definition 17 (Sign compression – [Karimireddy et al., 2019])** *Sign compression operator is defined as*

$$g(x) \stackrel{\text{def}}{=} \frac{\|\nabla f(x)\|_1}{d} \text{sign}(\nabla f(x)), \quad \forall x \in \mathbb{R}^d.$$

**Claim 19** *Sign compression operator satisfies Assumption 9 with  $A = C = c = 0$ ,  $B = 2(2 - \frac{1}{d})$ ,  $b = \frac{1}{2d}$ .*

**Definition 18 (Composition of sampling and 0-order estimator – Leluc and Portier [2022])** *Let  $h > 0$  be a constant, and there exists  $c > 0$ , such that a gradient estimator  $G_h(x)$  satisfies  $\|\mathbb{E}[G_h(x)] - \nabla f(x)\| \leq ch$ , for all  $x \in \mathbb{R}^d$ . Let  $D$  be a random matrix independent of  $G_h(x)$ , which is equal to  $e_j e_j^\top \in \mathbb{R}^d \times \mathbb{R}^d$  with probability  $\lambda_j \geq 0$ ,  $e_j \in \mathbb{R}^d$  is the  $j$ -th unit vector,  $j \in [d]$ ,  $\sum_{j=1}^d \lambda_j = 1$ . For some constants  $\tilde{A}, \tilde{C} \geq 0$ , let  $\mathbb{E}[\|G_h(x)\|^2] \leq 2\tilde{A}(f(x) - f^*) + \tilde{C}$ . Let us define Composition of coordinate sampling and zeroth-order estimator  $g(x) = D \cdot G_h(x)$ .*

**Claim 20** *Composition of coordinate sampling and zeroth-order estimator satisfies Assumption 9 with  $A = \tilde{A} \max_j \{\lambda_j\}$ ,  $B = 0$ ,  $C = \tilde{C} \max_j \{\lambda_j\}$ ,  $b = \frac{1}{2} \min_j \{\lambda_j\}$ ,  $c = \frac{1}{2} \max_j \{\lambda_j\} \cdot c^2 h^2$ .*

In Table 8 we gather the results from the current section. In Table 9 we show whether the estimators in this section fit or not to mentioned in the present work frameworks.

We would like to note that biased gradient estimators are widely used outside classical stochastic optimization/finite-sum and distributed training settings. Works [Chen et al., 2021b,c,d] are devoted to stochastic compositional/minimax/bilevel optimization, works [Hu et al., 2020b, 2021b, 2020a] — to conditional stochastic optimization, works [Levy et al., 2020; Wang et al., 2021] — to distributionally robust optimization, work [Ji et al., 2022] — to meta-learning.

## D Relations between assumptions 1–9

### D.1 Counterexamples to Figure 1

In Section 4 of the main part of the paper we outlined Theorem 1 in an informal way. Below we state it rigorously.

**Theorem 1 (Formal)** *The following relations hold:*

*i There is a minimization problem for which Assumption 3 is satisfied, but Assumption 7 is not. That is, (CON) does not imply (ABS). The reverse implication also does not hold true.*

| Name of an estimator                                                                    | Definition | $A$                                 | $B$               | $C$                 | $b$              | $c$                 |
|-----------------------------------------------------------------------------------------|------------|-------------------------------------|-------------------|---------------------|------------------|---------------------|
| <b>Biased independent sampling</b><br>This paper                                        | Def. 1     | $\frac{\max_i \{L_i\}}{\min_i p_i}$ | 0                 | $2A\Delta^* + s^2$  | $\min_i \{p_i\}$ | 0                   |
| <b>Distributed general biased rounding</b><br>This paper                                | Def. 2     | $A_r$                               | $B_r$             | $C_r$               | $b_r$            | $c_r$               |
| <b>Top-<math>k</math></b><br>[Aji and Heafield, 2017; Alistarh et al., 2018]            | Def. 3     | 0                                   | 1                 | 0                   | $\frac{k}{d}$    | 0                   |
| <b>Rand-<math>k</math></b><br>[Stich et al., 2018]                                      | Def. 4     | 0                                   | $\frac{d}{k}$     | 0                   | 1                | 0                   |
| <b>Biased Rand-<math>k</math></b><br>[Beznosikov et al., 2020]                          | Def. 5     | 0                                   | $\frac{k}{d}$     | 0                   | $\frac{k}{d}$    | 0                   |
| <b>Adaptive random sparsification</b><br>[Beznosikov et al., 2020]                      | Def. 6     | 0                                   | 1                 | 0                   | $\frac{1}{d}$    | 0                   |
| <b>General unbiased rounding</b><br>[Beznosikov et al., 2020]                           | Def. 7     | 0                                   | $\frac{Z}{4}$     | 0                   | 1                | 0                   |
| <b>General biased rounding</b><br>[Beznosikov et al., 2020]                             | Def. 8     | 0                                   | $F^2$             | 0                   | $\frac{G^2}{F}$  | 0                   |
| <b>Natural compression</b><br>[Horváth et al., 2022]                                    | Def. 9     | 0                                   | $\frac{9}{8}$     | 0                   | 1                | 0                   |
| <b>General exponential dithering</b><br>[Beznosikov et al., 2020]                       | Def. 10    | 0                                   | $H_a$             | 0                   | 1                | 0                   |
| <b>Natural dithering</b><br>[Horváth et al., 2022]                                      | Def. 11    | 0                                   | $H_2$             | 0                   | 1                | 0                   |
| <b>Composition of Top-<math>k</math> and exp dithering</b><br>[Beznosikov et al., 2020] | Def. 12    | 0                                   | $H_a^2$           | 0                   | $\frac{k}{dH_a}$ | 0                   |
| <b>Gaussian smoothing</b><br>[Polyak, 1987]                                             | Def. 13    | $A_{GS}$                            | $B_{GS}$          | $C_{GS}$            | $b_{GS}$         | $c_{GS}$            |
| <b>Hard-threshold sparsifier</b><br>[Sahu et al., 2021]                                 | Def. 14    | 0                                   | 1                 | 0                   | 1                | $w^2 d$             |
| <b>Scaled integer rounding</b><br>[Sapio et al., 2021]                                  | Def. 15    | 0                                   | 2                 | $\frac{2d}{\chi^2}$ | $\frac{1}{2}$    | $\frac{d}{2\chi^2}$ |
| <b>Biased dithering</b><br>[Khiriart et al., 2018a]                                     | Def. 16    | 0                                   | $d$               | 0                   | 1                | 0                   |
| <b>Sign compression</b><br>[Karimireddy et al., 2019]                                   | Def. 17    | 0                                   | $4 - \frac{2}{d}$ | 0                   | $\frac{1}{2d}$   | 0                   |

Table 8: Summary of the estimators with respective parameters  $A$ ,  $B$ ,  $C$ ,  $b$  and  $c$ , satisfying our general Biased ABC framework. Constants  $L_i$  are from Assumption 13,  $\Delta^*$  is defined in (26),  $A_r, B_r, C_r, b_r, c_r$  are defined in (27)–(31),  $Z$  is defined in (32),  $F$  and  $G$  are defined in (33),  $H_a$  is defined in (34),  $A_{GS}, B_{GS}, C_{GS}, b_{GS}, c_{GS}$  are defined in (35).

| Name of an estimator \ Assumption                                                        | A1 | A2 | A3 | A4 | A5 | A6 | A7 | A8 | A9 |
|------------------------------------------------------------------------------------------|----|----|----|----|----|----|----|----|----|
| <b>Biased independent sampling</b> [This paper]                                          | ✗  | ✗  | ✗  | ✗  | ✗  | ✗  | ✗  | ✗  | ✓  |
| <b>Distributed general biased rounding</b> [This paper]                                  | ✗  | ✗  | ✗  | ✗  | ✗  | ✗  | ✗  | ✗  | ✓  |
| <b>Top-<math>k</math> sparsification</b> [Aji and Heafield, 2017; Alistarh et al., 2018] | ✓  | ✓  | ✓  | ✓  | ✓  | ✓  | ✓  | ✓  | ✓  |
| <b>Rand-<math>k</math></b> [Stich et al., 2018]                                          | ✓  | ✓  | ✗  | ✓  | ✗  | ✓  | ✗  | ✓  | ✓  |
| <b>Biased Random-<math>k</math></b> [Beznosikov et al., 2020]                            | ✓  | ✓  | ✓  | ✓  | ✗  | ✓  | ✗  | ✓  | ✓  |
| <b>Adaptive random sparsification</b> [Beznosikov et al., 2020]                          | ✓  | ✓  | ✓  | ✓  | ✗  | ✓  | ✗  | ✓  | ✓  |
| <b>General unbiased rounding</b> [Beznosikov et al., 2020]                               | ✓  | ✓  | ✗  | ✓  | ✗  | ✓  | ✗  | ✓  | ✓  |
| <b>General biased rounding</b> [Beznosikov et al., 2020]                                 | ✓  | ✓  | ✓  | ✓  | ✓  | ✓  | ✗  | ✓  | ✓  |
| <b>Natural compression</b> [Horváth et al., 2022]                                        | ✓  | ✓  | ✓  | ✓  | ✗  | ✓  | ✗  | ✓  | ✓  |
| <b>General exponential dithering</b> [Beznosikov et al., 2020]                           | ✓  | ✓  | ✓  | ✓  | ✗  | ✓  | ✗  | ✓  | ✓  |
| <b>Natural dithering</b> [Horváth et al., 2022]                                          | ✓  | ✓  | ✓  | ✓  | ✗  | ✓  | ✗  | ✓  | ✓  |
| <b>Composition of Top-<math>k</math> and exp dithering</b> [Beznosikov et al., 2020]     | ✓  | ✓  | ✓  | ✓  | ✗  | ✓  | ✗  | ✓  | ✓  |
| <b>Gaussian smoothing</b> [Polyak, 1987]                                                 | ✗  | ✗  | ✗  | ✗  | ✗  | ✓  | ✗  | ✗  | ✓  |
| <b>Hard-threshold sparsifier</b> [Sahu et al., 2021]                                     | ✗  | ✓  | ✓  | ✓  | ✗  | ✓  | ✓  | ✓  | ✓  |
| <b>Scaled integer rounding</b> [Sapio et al., 2021]                                      | ✓  | ✓  | ✗  | ✓  | ✓  | ✓  | ✓  | ✓  | ✓  |
| <b>Biased dithering</b> [Khiriart et al., 2018a]                                         | ✓  | ✓  | ✗  | ✗  | ✓  | ✗  | ✗  | ✓  | ✓  |
| <b>Sign compression</b> [Karimireddy et al., 2019]                                       | ✓  | ✓  | ✓  | ✓  | ✓  | ✓  | ✗  | ✓  | ✓  |

Table 9: Summary on an inclusion of popular estimators into every known framework.

ii There is a minimization problem for which Assumption 3 is satisfied, but Assumption 5 is not. That is, (CON) does not imply (BREQ). The reverse implication also does not hold true.

iii There is a minimization problem for which Assumption 5 is satisfied, but Assumption 7 is not. That is, (BREQ) does not imply (ABS). The reverse implication also does not hold true.

iv There is a minimization problem for which Assumption 5 is satisfied, but Assumption 6 is not. That is, (BREQ) does not imply (BND). The reverse implication also does not hold true.

v There is a minimization problem for which Assumption 1 is satisfied, but Assumption 6 is not. That is, (SG1) does not imply (BND). The reverse implication also does not hold true.

vi There is a minimization problem for which Assumption 7 is satisfied, but Assumption 8 is not. That is, (ABS) does not imply (FSML). The reverse implication also does not hold true.

Clearly, this theorem implies that there is a mutual absence of implications between Assumption 7 (ABS) and Assumption 4 (BVD), Assumption 7 (ABS) and Assumption 1 (SG1), Assumption 7 (ABS) and Assumption 2 (SG2), Assumption 4 (BVD) and Assumption 5 (BREQ).

**Proof of Theorem 1** Let us prove all of the assertions stated above in Theorem 1 one by one.

i Consider  $f(x) = x^2$ ,  $g(x) = \frac{3}{2}\nabla f(x) = 3x$ . We have

$$\begin{aligned}\mathbb{E} \left[ \|g(x) - \nabla f(x)\|^2 \right] &= \left\| \frac{1}{2}\nabla f(x) \right\|^2 \\ &= x^2,\end{aligned}\tag{36}$$

which implies due to (7) that

$$\|\mathbb{E}[g(x)] - \nabla f(x)\|^2 \leq x^2,\tag{37}$$

$$\mathbb{E} \left[ \|g(x) - \mathbb{E}[g(x)]\|^2 \right] \leq x^2.\tag{38}$$

Clearly, the estimator satisfies Assumption 3 with  $\delta = \frac{4}{3}$ .

Clearly, the right-hand side of (36) can not be bounded by any constant  $\Delta^2$ , for all  $x \in \mathbb{R}$ . Therefore,  $g(x)$  does not satisfy Assumption 7.

Let us show that the reverse implication does not hold as well.

Let  $f(x) = x^2$ ,  $x \in \mathbb{R}$ . Let  $g(x) = 2x + 1$ . Then  $g(x)$  satisfies Assumptions 7. Indeed,

$$\mathbb{E} \left[ \|g(x) - \mathbb{E}[g(x)]\|^2 \right] = 0,\tag{39}$$

$$\|\mathbb{E}[g(x)] - \nabla f(x)\|^2 = 1,\tag{40}$$

which means that, due to (7), we have  $\mathbb{E} \left[ \|g(x) - \mathbb{E}[g(x)]\|^2 \right] = 1$ , and we can choose  $\Delta^2 = 1$ .

However, there is no  $\delta > 0$ , such that  $\mathbb{E} \left[ \|g(x) - \mathbb{E}[g(x)]\|^2 \right] = 1$  can be bounded from above by  $(1 - \frac{1}{\delta}) \|\nabla f(x)\|^2 = 4(1 - \frac{1}{\delta})x^2$ , for all  $x \in \mathbb{R}$ . Therefore,  $g(x)$  does not satisfy Assumption 3.

ii The implication does not hold trivially, since Assumption 5 is formulated for deterministic estimators only.

Let us show that the reverse implication does not hold as well.

Suppose  $g(x) = 3\nabla f(x)$  is a deterministic gradient estimator of  $f(x)$  with  $\|\nabla f(x)\|^2$  unbounded from above by a constant. Then  $g(x)$  satisfies Assumption 5. Indeed, we have

$$\langle g(x), \nabla f(x) \rangle = 3 \|\nabla f(x)\|^2,$$

$$\|g(x)\|^2 = 9 \|\nabla f(x)\|^2.$$

It means that we can choose  $\rho = 3$ ,  $\zeta = 9$ . However, since we have

$$\|\mathbb{E}[g(x)] - \nabla f(x)\|^2 = 4 \|\nabla f(x)\|^2,$$

and the variance is 0 ( $g(x)$  is deterministic), there is no  $\delta > 0$ , such that

$$\mathbb{E} \left[ \|g(x) - \mathbb{E}[g(x)]\|^2 \right] = 4 \|\nabla f(x)\|^2$$

can be bounded from above by  $(1 - \frac{1}{\delta}) \|\nabla f(x)\|^2$ , for all  $x \in \mathbb{R}$ . Therefore,  $g(x)$  does not satisfy Assumption 3.

iii Consider the example of the problem and the estimator from the proof of Theorem 1–i. Let  $f(x) = x^2$ ,  $g(x) = \frac{3}{2}\nabla f(x) = 3x$ . We have

$$\langle g(x), \nabla f(x) \rangle = 6x^2, \quad \|g(x)\|^2 = 9x^2,$$

which means that this estimator satisfies Assumption 5 with  $\rho = \frac{3}{2}$ ,  $\zeta = \frac{9}{4}$ .

Clearly, the right-hand side of (36) can not be bounded by any constant  $\Delta^2$ , for all  $x \in \mathbb{R}$ . Therefore,  $g(x)$  does not satisfy Assumption 7.

The reverse implication does not hold trivially, since Assumption 5 is formulated for deterministic estimators only.

iv Suppose  $g(x) = 3\nabla f(x)$  is a deterministic gradient estimator of  $f(x)$  with  $\|\nabla f(x)\|^2$  unbounded from above by a constant. In the proof of Theorem 1–ii we showed that  $g(x)$  satisfies Assumption 5 with  $\rho = 3$ ,  $\zeta = 9$ . However, since we have

$$\|\mathbb{E}[g(x)] - \nabla f(x)\|^2 = 4\|\nabla f(x)\|^2,$$

we are not able to find  $0 \leq m \leq 1$  and  $\varphi^2 \geq 0$ , such that

$$\|\mathbb{E}[g(x)] - \nabla f(x)\|^2 \leq \eta \|\nabla f(x)\|^2 + \varphi^2,$$

for all  $x \in \mathbb{R}^d$ . Therefore,  $g(x)$  does not satisfy Assumption 4.

The reverse implication does not hold trivially, since Assumption 5 is formulated for deterministic estimators only.

v Recall the stochastic estimator from Definition 7.

Suppose  $g(x)$  is a general unbiased rounding estimator multiplied by a factor of 3. Suppose that  $\|\nabla f(x)\|^2$  is not bounded from above. The estimator  $g(x)$  is biased:

$$\mathbb{E}[g(x)] = 3\nabla f(x).$$

Therefore,

$$\|\mathbb{E}[g(x)] - \nabla f(x)\|^2 = 4\|\nabla f(x)\|^2. \quad (41)$$

This biased estimator does not satisfy Assumption 6 since there is no  $0 \leq m < 1$ , such that  $\|\mathbb{E}[g(x)] - \nabla f(x)\|^2 \leq m\|\nabla f(x)\|^2 + \varphi^2$ .

Without loss of generality we assume that  $x \geq 0$ .

$$\begin{aligned} \mathbb{E}[\|g(x) - \mathbb{E}[g(x)]\|^2] &= \mathbb{E}[\|g(x)\|^2] - 9\|\nabla f(x)\|^2 \\ &= \left( \frac{9}{4} \sup_{k \in \mathbb{N}} \left( \frac{a_k}{a_{k+1}} + \frac{a_{k+1}}{a_k} + 2 \right) - 9 \right) \|\nabla f(x)\|^2 \\ &\geq 0. \end{aligned} \quad (42)$$

Observe that  $\langle \mathbb{E}[g(x)], \nabla f(x) \rangle = 3\|\nabla f(x)\|^2$ . It means that the gradient estimator satisfies Assumption 1 with  $\alpha = \frac{9Z}{4}$ ,  $\beta = \frac{3Z}{4}$ , where  $Z$  is defined in (32).

Let us show that the reverse implication does not hold as well.

As in the proof of Theorem 1–i, let  $f(x) = x^2$ ,  $x \in \mathbb{R}$ ,  $g(x) = 2x + 1$ . From (39) and (40), we conclude that  $g(x)$  satisfies Assumptions 6 with  $M = \sigma^2 = m = 0$ ,  $\varphi^2 = 1$ .

However, there is no constant  $\frac{\alpha}{\beta} \geq 0$ , such that a function

$$\langle \mathbb{E}[g(x)], \nabla f(x) \rangle = 2x(2x + 1)$$

can be bounded from below by

$$\frac{\alpha}{\beta} \|\nabla f(x)\|^2 = \frac{\alpha}{\beta} 4x^2,$$

for all  $x$ . Therefore,  $g(x)$  does not satisfy Assumption 1.

vi Let  $f(x) = x^2$ ,  $x \in \mathbb{R}$ ,  $g(x) = 2x + 1$ . In the proof of Theorem 1–i we showed that  $g(x)$  satisfies Assumption 7. However,  $g(x)$  does not satisfy Assumption 8. There is no constant  $q \geq 0$ , such that a function

$$\langle \mathbb{E}[g(x)], \nabla f(x) \rangle = 2x(2x + 1)$$

can be bounded from below by

$$q \|\nabla f(x)\|^2 = 4qx^2,$$

for all  $x$ . Therefore,  $g(x)$  does not satisfy Assumption 8.

Let us show that the reverse implication does not hold as well.

Suppose  $g(x)$  is a general unbiased rounding estimator (see Definition 7) multiplied by a factor of 3. Suppose that  $\|\nabla f(x)\|^2$  is not bounded from above. This estimator satisfies Assumption 8. Indeed, observe that  $\langle \mathbb{E}[g(x)], \nabla f(x) \rangle = 3 \|\nabla f(x)\|^2$ . Also,  $\|\mathbb{E}[g(x)]\|^2 = 9 \|\nabla f(x)\|^2$ . Therefore, we can choose  $q = u = 3, U = Z - 9, Q = 0$ .

Due to (7), (41) and (42), we have

$$\begin{aligned} \mathbb{E} [\|g(x) - \nabla f(x)\|^2] &= 4 \|\nabla f(x)\|^2 + \left( \frac{9}{4} \sup_{k \in \mathbb{N}} \left( \frac{a_k}{a_{k+1}} + \frac{a_{k+1}}{a_k} + 2 \right) - 9 \right) \|\nabla f(x)\|^2 \\ &\geq 4 \|\nabla f(x)\|^2. \end{aligned}$$

Then  $g(x)$  does not satisfy Assumption 7 since there is no  $\Delta \geq 0$ , such that  $4 \|\nabla f(x)\|^2 \leq \Delta^2$  holds, for all  $x \in \mathbb{R}^d$ . ■

## D.2 Implications in Figure 1

In Section 5.2 of the main part of the paper we outlined Theorem 2 in an informal way. Below we state it rigorously.

**Theorem 2** (Formal) *Let Assumption 0 hold for the function  $f$ . Then the following relations hold:*

- i *Suppose a gradient estimator  $g(x)$  satisfies Assumption 3. Then  $g(x)$  satisfies Assumption 4 with  $\eta = 1 - \frac{1}{\delta}, \xi = 1 - \frac{1}{\delta}$ . That is, (CON) implies (BVD). The reverse implication does not hold.*
- ii *Suppose a gradient estimator  $g(x)$  satisfies Assumption 4. Then  $g(x)$  satisfies Assumption 6 with  $m = \eta, \varphi^2 = 0, M = \frac{2\xi(1+\eta)}{(1-\eta)^2}, \sigma^2 = 0$ . That is, (BVD) implies (BND). The reverse implication does not hold.*
- iii *Suppose a gradient estimator  $g(x)$  satisfies Assumption 7. Then  $g(x)$  satisfies Assumption 6 with  $M = m = 0, \sigma^2 = \varphi^2 = \Delta^2$ . That is, (ABS) implies (BND). The reverse implication does not hold.*
- iv *Suppose a gradient estimator  $g(x)$  satisfies Assumption 4. Then  $g(x)$  satisfies Assumption 1 with  $\alpha = \frac{(1-\eta)^2}{2(1+\eta)}, \beta = \frac{2}{1-\eta} \max\{\xi, 2\xi + \eta - 1\}$ . That is, (BVD) implies (SG1). The reverse implication does not hold.*
- v *Suppose a gradient estimator  $g(x)$  satisfies Assumption 5. Then  $g(x)$  satisfies Assumption 1. That is, (BREQ) implies (SG1). The reverse implication does not hold.*
- vi *Assumption 1 (SG1) is equivalent to Assumption 2 (SG2).*
- vii *Suppose a gradient estimator  $g(x)$  satisfies Assumption 1. Then  $g(x)$  satisfies Assumption 8 with  $u = U = \beta^2, Q = 0, q = \frac{\alpha}{\beta}$ . That is, (SG1) implies (FSML). The reverse implication does not hold.*
- viii *Suppose a gradient estimator  $g(x)$  satisfies Assumption 8. Then  $g(x)$  satisfies Assumption 9 with  $A = 0, B = U + u^2, C = Q, b = q, c = 0$ . That is, (FSML) implies (Biased ABC). The reverse implication does not hold.*
- ix *Suppose a gradient estimator  $g(x)$  satisfies Assumption 6. Then  $g(x)$  satisfies Assumption 9 with  $A = 0, B = 2(M+1)(m+1), C = 2(M+1)\varphi^2 + \sigma^2, b = \frac{1-m}{2}, c = \frac{\varphi^2}{2}$ . That is, (BND) implies (Biased ABC). The reverse implication does not hold.*

**Proof of Theorem 2** Let us prove all of the assertions stated above in Theorem 2 one by one.

i. From (6) and from (7), we easily derive the following inequalities:

$$\|\mathbb{E}[g(x)] - \nabla f(x)\|^2 \leq \left(1 - \frac{1}{\delta}\right) \|\nabla f(x)\|^2,$$

and

$$\mathbb{E} \left[ \|g(x) - \mathbb{E}[g(x)]\|^2 \right] \leq \left(1 - \frac{1}{\delta}\right) \|\nabla f(x)\|^2.$$

Therefore, we can choose  $\eta = 1 - \frac{1}{\delta}$ ,  $\xi = 1 - \frac{1}{\delta}$ .

Next, let us show that the reverse implication does not hold. Suppose  $g(x)$  is a gradient estimator of the following form:

$$g(x) = \nabla f(x) + X, \text{ where } X = \begin{cases} 4 \nabla f(x), & \text{with probability } \frac{1}{4} \\ 0, & \text{with probability } \frac{3}{4}. \end{cases}$$

For the estimator  $g(x)$  we have

$$\|\mathbb{E}[g(x)] - \nabla f(x)\|^2 = \|\nabla f(x)\|^2,$$

and

$$\mathbb{E} \left[ \|g(x) - \mathbb{E}[g(x)]\|^2 \right] = \mathbb{E} \left[ \|X\|^2 \right] - \|\mathbb{E}[X]\|^2 = 3 \|\nabla f(x)\|^2.$$

We can choose  $\eta = 1$ ,  $\xi = 3$ , so  $g(x)$  satisfies Assumption 4. But there is no  $\delta \geq 1$ , such that, for all  $x \in \mathbb{R}^d$ ,

$$\mathbb{E} \left[ \|g(x) - \nabla f(x)\|^2 \right] \stackrel{(7)}{=} \mathbb{E} \left[ \|g(x) - \mathbb{E}[g(x)]\|^2 \right] + \|\mathbb{E}[g(x)] - \nabla f(x)\|^2 = 4 \|\nabla f(x)\|^2$$

does not exceed  $(1 - \frac{1}{\delta}) \|\nabla f(x)\|^2$ . Then  $g(x)$  does not satisfy Assumption 3.

ii. Since we know that

$$\|\mathbb{E}[g(x)] - \nabla f(x)\|^2 \leq \eta \|\nabla f(x)\|^2, \quad (43)$$

we can choose  $m = \eta$  and  $\varphi^2 = 0$ . By Young's Inequality (Lemma 3, (68)), from (43) we derive that

$$\begin{aligned} (1 - \eta) \|\nabla f(x)\|^2 &\leq 2\langle \mathbb{E}[g(x)], \nabla f(x) \rangle - \|\mathbb{E}[g(x)]\|^2 \\ &\leq \frac{(1 - \eta) \|\nabla f(x)\|^2}{2} + \frac{2 \|\mathbb{E}[g(x)]\|^2}{(1 - \eta)} - \|\mathbb{E}[g(x)]\|^2. \end{aligned}$$

Hence,

$$\|\nabla f(x)\|^2 \leq \frac{2(1 + \eta)}{(1 - \eta)^2} \|\mathbb{E}[g(x)]\|^2.$$

Also, we know that

$$\mathbb{E} \left[ \|g(x) - \mathbb{E}[g(x)]\|^2 \right] \leq \xi \|\nabla f(x)\|^2.$$

Therefore, we arrive at

$$\mathbb{E} \left[ \|g(x) - \mathbb{E}[g(x)]\|^2 \right] \leq \frac{2\xi(1 + \eta)}{(1 - \eta)^2} \|\mathbb{E}[g(x)]\|^2.$$

We can choose  $M = \frac{2\xi(1 + \eta)}{(1 - \eta)^2}$ ,  $\sigma^2 = 0$ .

Next, let us show that the reverse implication does not hold. As in the proof of Theorem 1-i, let  $f(x) = x^2$ ,  $x \in \mathbb{R}$ . Let  $g(x) = 2x + 1$ . From (39) and (40), we conclude that  $g(x)$  satisfies Assumption 6 with  $M = \sigma^2 = m = 0$ ,  $\varphi^2 = 1$ .

However, there is no  $0 \leq \eta \leq 1$ , such that  $\|\mathbb{E}[g(x)] - \nabla f(x)\|^2 = 1$  is bounded from above by  $\xi \|\nabla f(x)\|^2 = 4\eta x^2$ , for all  $x \in \mathbb{R}$ . It means that Assumption 4 does not hold.

iii Indeed, (7) and (14) imply  $\mathbb{E} \left[ \|g(x) - \mathbb{E}[g(x)]\|^2 \right] \leq \Delta^2$  and  $\|\mathbb{E}[g(x)] - \nabla f(x)\|^2 \leq \Delta^2$ . Therefore, Assumption 6 is satisfied with  $M = m = 0$ ,  $\sigma^2 = \varphi^2 = \Delta^2$ .

Next, let us prove that the reverse implication does not hold. Consider the example of the problem and the estimator from the proof of Theorem 1–iii. From (37) and (38) we conclude that the estimator satisfies Assumption 6 with  $M = \frac{1}{9}$ ,  $m = \frac{1}{4}$ , but Assumption 7 is not satisfied.

iv. Since we know that

$$\|\mathbb{E}[g(x)] - \nabla f(x)\|^2 \leq \eta \|\nabla f(x)\|^2, \quad (44)$$

we obtain

$$(1 - \eta) \|\nabla f(x)\|^2 \leq 2\langle \mathbb{E}[g(x)], \nabla f(x) \rangle - \|\mathbb{E}[g(x)]\|^2. \quad (45)$$

Then

$$\begin{aligned} \mathbb{E} \left[ \|g(x) - \mathbb{E}[g(x)]\|^2 \right] &\leq \xi \|\nabla f(x)\|^2 \\ &\leq \frac{2\xi}{1-\eta} \langle \mathbb{E}[g(x)], \nabla f(x) \rangle - \frac{\xi}{1-\eta} \|\mathbb{E}[g(x)]\|^2. \end{aligned}$$

If  $\xi + \eta \leq 1$ , we obtain that

$$\mathbb{E} \left[ \|g(x)\|^2 \right] \leq \frac{2\xi}{1-\eta} \langle \mathbb{E}[g(x)], \nabla f(x) \rangle.$$

Otherwise,

$$\begin{aligned} \mathbb{E} \left[ \|g(x)\|^2 \right] &\leq \frac{2\xi}{1-\eta} \langle \mathbb{E}[g(x)], \nabla f(x) \rangle + \left( \frac{\xi}{1-\eta} - 1 \right) \|\mathbb{E}[g(x)]\|^2 \\ &\leq \frac{2(2\xi + \eta - 1)}{1-\eta} \langle \mathbb{E}[g(x)], \nabla f(x) \rangle. \end{aligned}$$

Hence, we can choose  $\beta = \frac{2}{1-\eta} \max\{\xi, 2\xi + \eta - 1\}$ . Further, by Young's Inequality (Lemma 3, (68)), from (43) we derive that

$$\begin{aligned} (1 - \eta) \|\nabla f(x)\|^2 &\leq 2\langle \mathbb{E}[g(x)], \nabla f(x) \rangle - \|\mathbb{E}[g(x)]\|^2 \\ &\leq \frac{(1 - \eta) \|\nabla f(x)\|^2}{2} + \frac{2 \|\mathbb{E}[g(x)]\|^2}{(1 - \eta)} - \|\mathbb{E}[g(x)]\|^2. \end{aligned}$$

Then we have

$$\|\mathbb{E}[g(x)]\|^2 \geq \frac{(1 - \eta)^2}{2(1 + \eta)} \|\nabla f(x)\|^2.$$

Therefore, we can choose  $\alpha = \frac{(1-\eta)^2}{2(1+\eta)}$ .

Let us show that the inverse implication does not hold.

Consider the problem and the estimator from the proof of Theorem 1–v. Since  $\|\nabla f(x)\|^2$  is not bounded from above, this estimator does not satisfy Assumption 4: there is no  $0 \leq \eta \leq 1$  such that

$$\|\mathbb{E}[g(x)] - \nabla f(x)\|^2 \leq \eta \|\nabla f(x)\|^2.$$

However, recall that Assumption 1 is satisfied with  $\alpha = Z$ ,  $\beta = \frac{Z}{3}$ , where  $Z$  is defined in (32).

v. Observe that

$$\|\nabla f(x)\|^2 \leq \frac{1}{\rho} \langle g(x), \nabla f(x) \rangle.$$

Therefore,

$$\|g(x)\|^2 \leq \zeta \|\nabla f(x)\|^2 \leq \frac{\zeta}{\rho} \langle g(x), \nabla f(x) \rangle,$$

and we can choose  $\beta = \frac{\zeta}{\rho}$  in Assumption 1. By Young's Inequality (Lemma 3, (68)), we have

$$\begin{aligned} \rho \|\nabla f(x)\|^2 &\leq \langle g(x), \nabla f(x) \rangle \\ &\leq \frac{\|g(x)\|^2}{2\rho} + \frac{\rho \|\nabla f(x)\|^2}{2}. \end{aligned}$$

This implies that  $\|g(x)\|^2 \geq \rho^2 \|\nabla f(x)\|^2$ , and we can choose  $\alpha = \rho^2$  in Assumption 1.

The reverse implication does not hold. Since Assumption 5 is formulated for deterministic estimators only, any stochastic estimator that satisfies Assumption 1 does not satisfy Assumption 5.

vi. It follows from assertions 1 and 2 of Theorem 14.

vii Recall that Assumption 1 implies (5). Since  $\|\mathbb{E}[g(x)]\|^2 \leq \mathbb{E}[\|g(x)\|^2]$ , we can choose  $u = \beta$ . From  $\langle \mathbb{E}[g(x)], \nabla f(x) \rangle \geq \alpha \|\nabla f(x)\|$ , we conclude that  $q$  can be set to  $\frac{\alpha}{\beta}$ . Furthermore,  $\mathbb{E}[\|g(x) - \mathbb{E}[g(x)]\|^2] \leq \mathbb{E}[\|g(x)\|^2]$  and (5) imply that we can put  $U$  equal to  $\beta^2$ ,  $Q = 0$ . Note, that Theorem 14 states that  $\beta^2 \geq \alpha$ . Therefore, the requirement  $q \leq u$  from Assumption 8 is also satisfied.

Let us prove that the reverse implication does not hold. For every  $x \in \mathbb{R}$ , consider  $f(x) = x^3$ ,  $g(x) = Y \nabla f(x) + Z$ , where  $Y$  is a random variable with Bern  $(\frac{1}{2})$  distribution, independent of a random variable  $Z$  that attains values  $\pm 1$  with equal probability. First, we establish relations (15), (16) and (17) in this setting:

$$\begin{aligned} \langle \nabla f(x), \mathbb{E}[g(x)] \rangle &= \frac{1}{2} \|\nabla f(x)\|^2 = \frac{9}{2} x^4, \\ \|\mathbb{E}[g(x)]\|^2 &= \frac{1}{4} \|\nabla f(x)\|^2 = \frac{9}{4} x^4, \\ \mathbb{E}[\|g(x)\|^2] - \|\mathbb{E}[g(x)]\|^2 &= \mathbb{E}[Y^2 \|\nabla f(x)\|^2 + 2YZ \nabla f(x) + Z^2] - \frac{1}{4} \|\nabla f(x)\|^2 \\ &= \frac{1}{2} \|\nabla f(x)\|^2 + 1 - \frac{1}{4} \|\nabla f(x)\|^2 \\ &= \frac{1}{4} \|\nabla f(x)\|^2 + 1 \\ &= \frac{9}{4} x^4 + 1. \end{aligned}$$

This implies, that  $g(x)$  satisfies Assumption 8 with  $q = u = \frac{1}{2}$ ,  $U = \frac{1}{4}$  and  $Q = 1$ .

Consider the implication (5) from Assumption 1. Notice, that

$$\mathbb{E}[\|g(x)\|^2] = \frac{1}{2} \|\nabla f(x)\|^2 + 1 = \frac{9}{2} x^4 + 1,$$

and it can not be bounded from above by  $\beta^2 \|\nabla f(x)\|^2 = 9\beta^2 x^4$ , for all  $x \in \mathbb{R}$ . Therefore, (5) does not hold, which means that Assumption 1 also does not hold.

viii. Suppose  $g(x)$  satisfies Assumption 8.

From (15), we conclude that  $b$  can be chosen as  $q$ ,  $c$  can be chosen as 0. Further, (17) implies that

$$\mathbb{E}[\|g(x)\|^2] \leq U \|\nabla f(x)\|^2 + \|\mathbb{E}[g(x)]\|^2 + Q.$$

From (16), we obtain that

$$\mathbb{E}[\|g(x)\|^2] \leq (U + u^2) \|\nabla f(x)\|^2 + Q.$$

Therefore, we can choose  $A = 0$ ,  $B = U + u^2$ ,  $C = Q$ .

Next, let us prove that the reverse implication does not hold. Consider function  $f$  which is 1-smooth and lower bounded by 0 :

$$f(x) = \begin{cases} \frac{x^2}{2}, & \text{if } |x| < 1, \\ |x| - \frac{1}{2}, & \text{otherwise.} \end{cases}$$

(Huber Loss). Consider a biased estimator

$$g(x) = \begin{cases} \nabla f(x) + \sqrt{|x|} + 1 & \text{with probability } 1/2, \\ \nabla f(x) - \sqrt{|x|} + 1 & \text{with probability } 1/2. \end{cases}$$

Observe that  $\mathbb{E}g(x) = \nabla f(x) + 1$ . Suppose condition (17) of Assumption 8 holds. Then there exist constants  $U, Q \geq 0$  such that,

$$\mathbb{E} [\|g(x)\|^2] - \|\mathbb{E} [g(x)]\|^2 \leq U \|\nabla f(x)\|^2 + Q.$$

Consider the point  $x = U + Q + 4$ , then  $|x| > 1$  and hence  $\nabla f(x) = 1$  by the definition of  $f$ . Then we obtain

$$\mathbb{E} [\|g(x)\|^2] \leq U + Q + 4$$

On the other hand, we fall into contradiction since

$$\mathbb{E} [\|g(x)\|^2] = \frac{1}{2} ((2 + \sqrt{x})^2 + (2 - \sqrt{x})^2) = x + 4 = U + Q + 8.$$

It follows that condition (17) of Assumption 8 does not hold. We now show that Assumption 9 holds: first, suppose that  $x \geq 1$ , then

$$\begin{aligned} \mathbb{E} [\|g(x)\|^2] &= \frac{1}{2} \left( (2 + \sqrt{|x|})^2 + (2 - \sqrt{|x|})^2 \right) \\ &= \frac{1}{2} (8 + 2|x|) = 4 + |x| \\ &= \frac{9}{2} + (f(x) - f^{\inf}), \end{aligned}$$

since for  $|x| \geq 1$  we have  $f(x) - f^{\inf} = |x| - 1/2$ . In turn,

$$\langle \nabla f(x), \mathbb{E} [g(x)] \rangle = \langle \nabla f(x), \nabla f(x) + 1 \rangle \geq \|\nabla f(x)\|^2.$$

Suppose that  $x \leq -1$ , then  $\nabla f(x) = -1$ , and

$$\begin{aligned} \mathbb{E} [\|g(x)\|^2] &= \frac{1}{2} \left( (\sqrt{|x|})^2 + (-\sqrt{|x|})^2 \right) \\ &= |x| \\ &= \frac{1}{2} + (f(x) - f^{\inf}). \end{aligned}$$

In turn,

$$\langle \nabla f(x), \mathbb{E} [g(x)] \rangle = \langle \nabla f(x), \nabla f(x) + 1 \rangle = \|\nabla f(x)\|^2 - 1.$$

Now suppose that  $|x| \leq 1$ , then

$$\begin{aligned} \mathbb{E} [\|g(x)\|^2] &= \frac{1}{2} \left( (x + \sqrt{|x|})^2 + (x - \sqrt{|x|})^2 \right) \\ &= x^2 + |x| \\ &\leq 1 + 1 \\ &= 2. \end{aligned}$$

In turn,

$$\langle \nabla f(x), \mathbb{E} [g(x)] \rangle = \langle \nabla f(x), \nabla f(x) + 1 \rangle = \|\nabla f(x)\|^2 + x \geq \|\nabla f(x)\|^2 - 1.$$

It means that, for all  $x \in \mathbb{R}$ ,

$$\mathbb{E} [\|g(x)\|^2] \leq f(x) - f^{\inf} + \frac{9}{2}$$

and

$$\langle \nabla f(x), \mathbb{E} [g(x)] \rangle \geq \|\nabla f(x)\|^2 - 1.$$

It follows that Assumption 9 is satisfied with  $A = \frac{1}{2}$ ,  $B = 0$ ,  $C = \frac{9}{2}$ ,  $b = c = 1$ .

ix. First, we bound the second moment of  $g(x)$  :

$$\begin{aligned}
\mathbb{E} [\|g(x)\|^2] &= \mathbb{E} [\|g(x) - \mathbb{E}[g(x)]\|^2] + \|\mathbb{E}[g(x)]\|^2 \\
&= \mathbb{E} \|\mathcal{N}(x, Y)\|^2 + \|\nabla f(x) + b(x)\|^2 \\
&\leq (M+1) \|\nabla f(x) + b(x)\|^2 + \sigma^2 \\
&\leq 2(M+1) \|\nabla f(x)\|^2 + 2(M+1) \|b(x)\|^2 + \sigma^2 \\
&\leq 2(M+1)(m+1) \|\nabla f(x)\|^2 + 2(M+1) \varphi^2 + \sigma^2.
\end{aligned}$$

We can choose  $A = 0$ ,  $B = 2(M+1)(m+1)$ ,  $C = 2(M+1)\varphi^2 + \sigma^2$  in Assumption 9. Further, note that (13) can be rewritten in an equivalent way in terms of the lower bound on the scalar product:

$$\begin{aligned}
\langle \nabla f(x), \mathbb{E}[g(x)] \rangle &= \frac{\|\nabla f(x)\|^2}{2} + \frac{\|\mathbb{E}[g(x)]\|^2}{2} - \frac{\|\mathbb{E}[g(x)] - \nabla f(x)\|^2}{2} \\
&\geq \frac{1-m}{2} \|\nabla f(x)\|^2 + \frac{\|\mathbb{E}[g(x)]\|^2}{2} - \frac{\varphi^2}{2}.
\end{aligned} \tag{46}$$

Therefore,

$$\langle \nabla f(x), \mathbb{E}[g(x)] \rangle \geq \frac{1-m}{2} \|\nabla f(x)\|^2 - \frac{\varphi^2}{2}. \tag{47}$$

Observe that in (47) we used only a trivial lower bound of 0 on  $\mathbb{E}[g(x)]$ , which signifies that our assumption on scalar product (18) is less restrictive than the Assumption 13 on the bias term.

Let us prove that the reverse implication does not hold. Consider the problem and the estimator from the proof of Theorem 1–viii. Suppose that condition (12) of Assumption 6 holds. Then there exist  $M, \sigma^2 \geq 0$  such that

$$\mathbb{E} [\|g(x)\|^2] - \|\mathbb{E}[g(x)]\|^2 \leq M \|\mathbb{E}[g(x)]\|^2 + \sigma^2.$$

Consider the point  $x = 4(M+1) + \sigma^2$ , then  $|x| > 1$  and hence  $\nabla f(x) = 1$  by the definition of  $f$ . Then we obtain that

$$\mathbb{E} [\|g(x)\|^2] \leq 4(M+1) + \sigma^2.$$

On the other hand, we fall into contradiction since

$$\mathbb{E} [\|g(x)\|^2] = \frac{1}{2} \left( (2 + \sqrt{|x|})^2 + (2 - \sqrt{|x|})^2 \right) = x + 4 = 4(M+1) + \sigma^2 + 4.$$

It is shown in the proof of Theorem 1–viii that Assumption 9 is satisfied with  $A = \frac{1}{2}$ ,  $B = 0$ ,  $C = \frac{9}{2}$ ,  $b = c = 1$ . ■

### D.2.1 Proof of Claim 1

Let  $p_1 = p_2 = \frac{1}{3}$  be probabilities. For every  $i \in \{1, 2\}$ , define a random set as follows:

$$S_i = \begin{cases} \{i\} & \text{with probability } p_i, \\ \emptyset & \text{with probability } 1 - p_i. \end{cases}$$

Define a random subset  $S \subseteq \{1, 2\}$  by taking the union of these random sets:

$$S \stackrel{\text{def}}{=} S_1 \cup S_2.$$

For every  $i \in \{1, 2\}$ , define  $v_i = \frac{\mathbb{I}_{i \in S}}{p_i^2}$ . Let

$$g(x) = \frac{1}{2} \sum_{i=1}^n v_i \nabla f_i(x).$$

Consider  $f(x) = \frac{1}{2} (f_1(x) + f_2(x))$ , where  $f_1(x) = x_1^2$ ,  $f_2(x) = x_2^2$ . For the introduced stochastic gradient, we have

$$\langle \mathbb{E}[g(x)], \nabla f(x) \rangle = 3(x_1^2 + x_2^2). \quad (48)$$

Therefore,  $g(x)$  satisfies (18) of Assumption 9 with  $b = 3$ ,  $c = 0$ . Observe that

$$\mathbb{E}[\|g(x)\|^2] = 27(x_1^2 + x_2^2). \quad (49)$$

Therefore,  $g(x)$  also satisfies (19) with  $A = 0$ ,  $B = 27$ ,  $C = 0$ .

Recall that inequality (13) of Assumption 6 is equivalent to (46).

Since  $\|\mathbb{E}[g(x)]\|^2 = 9(x_1^2 + x_2^2)$ , the right-hand side of (46) is equal to

$$\frac{10-m}{2}(x_1^2 + x_2^2) - \frac{\varphi^2}{2},$$

$0 \leq m < 1$ ,  $\varphi^2 \geq 0$ . This expression can not bound (48) from below, for all  $x = (x_1, x_2) \in \mathbb{R}^2$ . Hence, this gradient estimator does not satisfy (13) of Assumption 6. ■

## E General nonconvex case: history and corollaries from Theorem 3

In Section 6.1 we have formulated Theorem 3 on convergence of [BiasedSGD](#) under Biased ABC assumption and compared the rate obtained to the known convergence results in nonconvex case. Below we present recent results, derive several corollaries from Theorem 3 and make a formal comparison of our results to the known results.

### E.1 Known results

Convergence of [BiasedSGD](#) in general smooth case has been studied in several papers. The next two results are Lemma 3 and Theorem 4 from [Ajalloeian and Stich, 2020]. We formulate them as a theorem and its corollary respectively.

**Theorem 6** *Under Assumptions 0 and 6, and for any stepsize  $\gamma \leq \frac{1}{(M+1)L}$ , it holds after  $T$  steps of [BiasedSGD](#) that*

$$\frac{1}{T} \sum_{t=0}^{T-1} \mathbb{E}[\|\nabla f(x^t)\|^2] \leq \frac{2\delta^0}{T\gamma(1-m)} + \frac{\gamma L\sigma^2}{1-m} + \frac{\varphi^2}{1-m}.$$

**Corollary 1** *Under Assumptions 0 and 6, and by choosing the stepsize  $\gamma = \min\left\{\frac{1}{(M+1)L}, \frac{\varepsilon(1-m)}{2L\sigma^2}\right\}$ , for  $\varepsilon > 0$ , we have that*

$$T = \mathcal{O}\left(\max\left\{\frac{4(M+1)}{\varepsilon(1-m)}, \frac{8\sigma^2}{\varepsilon^2(1-m)^2}\right\} L\delta^0\right)$$

*iterations suffice to obtain*

$$\frac{1}{T} \sum_{t=0}^{T-1} \mathbb{E}[\|\nabla f(x^t)\|^2] = \mathcal{O}\left(\varepsilon + \frac{\varphi^2}{1-m}\right).$$

The convergence result that we get in Theorem 3 is formulated in terms of minimum of expected squared gradient norms. However, in Corollary 1 the convergence established not for the minimum, but for the mean of expected squared gradient norms. Since the minimum is not greater than the mean, we can immediately restate Corollary 1 in a slightly weaker form:

**Corollary 2** Under Assumptions 0 and 6, and by choosing the stepsize  $\gamma = \min \left\{ \frac{1}{(M+1)L}, \frac{\varepsilon(1-m)}{2L\sigma^2} \right\}$ , for  $\varepsilon > 0$ , we have that

$$T = \mathcal{O} \left( \max \left\{ \frac{4(M+1)}{\varepsilon(1-m)}, \frac{8\sigma^2}{\varepsilon^2(1-m)^2} \right\} L\delta^0 \right)$$

iterations suffice to obtain

$$\min_{0 \leq t \leq T-1} \mathbb{E} \left[ \|\nabla f(x^t)\|^2 \right] = \mathcal{O} \left( \varepsilon + \frac{\varphi^2}{1-m} \right).$$

The result below is Theorem 4.8 from [Bottou et al., 2018].

**Theorem 7** Under Assumptions 0 and 8, and for any stepsize  $0 < \gamma \leq \frac{q}{L(U+u^2)}$ , for all  $T \in \mathbb{N}$ , the following inequality holds:

$$\frac{1}{T} \sum_{t=0}^{T-1} \mathbb{E} \left[ \|\nabla f(x^t)\|^2 \right] \leq \frac{\gamma LQ}{q} + \frac{2\delta^0}{Tq\gamma}.$$

To be able to make a further comparison of convergence rates, we need to establish the rate the above theorem yields. Once again, the convergence result that we get in Theorem 3 is formulated in terms of minimum of expected squared gradient norms. However, in Corollary 7 the convergence established not for the minimum, but for the mean of expected squared gradient norms. Since minimum is smaller than the mean, we can immediately write the corollary in a slightly weaker form:

**Corollary 3** For  $\varepsilon > 0$ , choose stepsize  $\gamma > 0$  as  $\gamma = \min \left\{ \frac{\varepsilon q}{2LQ}, \frac{q}{L(U+u^2)} \right\}$ . Then, if

$$T \geq \max \left\{ \frac{8Q}{\varepsilon^2 q^2}, \frac{4(U+u^2)}{\varepsilon q^2} \right\} L\delta^0,$$

we have that

$$\min_{0 \leq t \leq T-1} \mathbb{E} \left[ \|\nabla f(x^t)\|^2 \right] \leq \varepsilon.$$

## E.2 Corollaries from Theorem 3

In general, Theorem 3 guarantees the convergence towards some neighborhood of the  $\varepsilon$ -stationary point, that can not be made less than  $\frac{\varepsilon}{b}$ . Therefore, we have the following corollary.

**Corollary 4** Choose the stepsize  $\gamma > 0$  as  $\gamma = \min \left\{ \frac{1}{\sqrt{LAT}}, \frac{b}{LB}, \frac{c}{LC} \right\}$ . Then if

$$T \geq \frac{6\delta^0 L}{c} \max \left\{ \frac{B}{b}, \frac{6\delta^0 A}{c}, \frac{C}{c} \right\},$$

we have

$$\min_{0 \leq t \leq T-1} \mathbb{E} \left[ \|\nabla f(x^t)\|^2 \right] \leq \frac{3c}{b}.$$

Next two corollaries are Theorem 2 and Corollary 1 from [Khaled and Richtárik, 2023]. However, in that work the authors obtain these results in the unbiased case, i.e. when  $\mathbb{E}[g(x)] = \nabla f(x)$  holds, for all  $x \in \mathbb{R}^d$ . In our case we only require  $\langle \mathbb{E}[g(x)], \nabla f(x) \rangle \geq \|\nabla f(x)\|^2$  to hold, for all  $x \in \mathbb{R}^d$ .

**Corollary 5** Suppose  $c = 0, b = 1$ . Choose the stepsize such that  $0 < \gamma \leq \frac{1}{LB}$ . Then the iterates  $\{x^t\}_{t \geq 0}$  of BiasedSGD (Algorithm (1)) satisfy

$$\min_{0 \leq t \leq T-1} \mathbb{E} \left[ \|\nabla f(x^t)\|^2 \right] \leq \frac{2(1+LA\gamma^2)^T}{\gamma T} \delta^0 + LC\gamma. \quad (50)$$

**Corollary 6** Suppose  $c = 0$  and  $b = 1$ . Fix  $\varepsilon > 0$ . Choose the stepsize  $\gamma > 0$  as  $\gamma = \min \left\{ \frac{1}{\sqrt{LAT}}, \frac{1}{LB}, \frac{\varepsilon}{2LC} \right\}$ . Then, if

$$T \geq \frac{12\delta^0 L}{\varepsilon^2} \max \left\{ B, \frac{12\delta^0 A}{\varepsilon^2}, \frac{2C}{\varepsilon^2} \right\},$$

we have

$$\min_{0 \leq t \leq T-1} \mathbb{E} [\|\nabla f(x^t)\|] \leq \varepsilon.$$

The next corollary contains the result similar to the one obtained in Theorem 4 from [Ajalloeian and Stich, 2020]. However, we impose weaker assumptions (compare Biased ABC and BND in Figure 1; see also Claim 1).

**Corollary 7** Suppose  $A = 0$ ,  $b \leq 1$ . Choose stepsize  $\gamma > 0$  as  $\gamma = \min \left\{ \frac{b}{LB}, \frac{\varepsilon b}{2LC} \right\}$ . Then, for  $\varepsilon > 0$ , we have that

$$\mathcal{T} = \mathcal{O} \left( \max \left\{ \frac{8C}{b^2 \varepsilon^2}, \frac{4B}{b^2 \varepsilon} \right\} L \delta^0 \right)$$

iterations suffice for

$$\min_{0 \leq t \leq T-1} \mathbb{E} [\|\nabla f(x^t)\|^2] = \mathcal{O} \left( \varepsilon + \frac{c}{b} \right).$$

If we substitute  $B$  for  $2(M+1)(m+1)$ ,  $C$  for  $2(M+1)\varphi^2 + \sigma^2$ ,  $b$  for  $\frac{1-m}{2}$ ,  $c$  for  $\frac{\varphi^2}{2}$  in accordance with Theorem 13 (see also Table 1), Corollary 7 yields the rate of  $\mathcal{O} \left( \max \left\{ \frac{8(M+1)(m+1)}{(1-m)^2 \varepsilon}, \frac{16(M+1)\varphi^2 + 2\sigma^2}{(1-m)^2 \varepsilon^2} \right\} L \delta^0 \right)$  while Corollary 2 (see Theorem 4 from [Ajalloeian and Stich, 2020]) grants the rate of  $\mathcal{T} = \mathcal{O} \left( \max \left\{ \frac{2\sigma^2}{(1-m)^2 \varepsilon^2}, \frac{M+1}{(1-m)\varepsilon} \right\} L \delta^0 \right)$ . Our result is worse by a factor of  $\frac{1}{1-m}$  and by an additive term of  $\mathcal{O} \left( \frac{(M+1)\varphi^2}{(1-m)^2 \varepsilon^2} L \delta^0 \right)$ .

**Corollary 8** Suppose  $A = c = 0$ . For  $\varepsilon > 0$ , choose stepsize  $\gamma = \min \left\{ \frac{b}{LB}, \frac{b\varepsilon}{LC} \right\}$ . Then, if

$$T \geq \max \left\{ \frac{8C}{\varepsilon^2 b^2}, \frac{4B}{\varepsilon b^2} \right\} L \delta^0,$$

we have that

$$\min_{0 \leq t \leq T-1} \mathbb{E} [\|\nabla f(x^t)\|^2] \leq \varepsilon.$$

To recover the result from Corollary 3, one needs to substitute  $B$  for  $U + u^2$ ,  $C$  for  $Q$ ,  $b$  for  $q$  in accordance with the representation of Assumption 8 in Biased ABC framework (see Theorem 13 and Table 1).

### E.3 Proof of Corollary 3

If  $\gamma = \frac{\varepsilon q}{2LQ}$ , and  $T \geq \frac{8LQ\delta^0}{\varepsilon^2 q^2}$ , then we have that

$$\frac{\gamma LQ}{q} \leq \frac{\varepsilon}{2}, \quad \frac{2\delta^0}{Tq\gamma} = \frac{4LQ\delta^0}{T\varepsilon q^2} \leq \frac{\varepsilon}{2}.$$

If  $\gamma = \frac{q}{L(U+u^2)}$  and  $T \geq \frac{4L(U+u^2)\delta^0}{\varepsilon q^2}$ , then we obtain that

$$\frac{\gamma LQ}{q} \leq \frac{\varepsilon q}{2LQ} \cdot \frac{LQ}{q} \leq \frac{\varepsilon}{2}, \quad \frac{2\delta^0}{Tq\gamma} = \frac{2\delta^0 L(U+u^2)}{Tq^2} \leq \frac{\varepsilon}{2}.$$

Therefore, we get that

$$\min_{0 \leq t \leq T-1} \mathbb{E} [\|\nabla f(x^t)\|^2] \leq \varepsilon.$$

■

#### E.4 Key lemma

Our main convergence result in the nonconvex scenario relies on the following key lemma.

**Lemma 2** *Let Assumptions 0 and 9 hold. Choose stepsize  $\gamma$  satisfying*

$$0 < \gamma \leq \frac{b}{LB}. \quad (51)$$

*Then, for any  $T \geq 1$ , the iterates  $\{x^t\}$  of Algorithm 1 satisfy*

$$\frac{b}{2} \sum_{t=0}^{T-1} w_t r^t \leq \frac{w_{-1}}{\gamma} \delta^0 - \frac{w_{T-1}}{\gamma} \delta^T + \frac{LC\gamma + c}{2} \sum_{t=0}^{T-1} w_t.$$

**Proof of Lemma 2** From Assumption 0 we have

$$\begin{aligned} f(x^{t+1}) &\leq f(x^t) + \langle \nabla f(x^t), x^{t+1} - x^t \rangle + \frac{L}{2} \|x^{t+1} - x^t\|^2 \\ &= f(x^t) - \gamma \langle \nabla f(x^t), g^t \rangle + \frac{L\gamma^2}{2} \|g^t\|^2. \end{aligned} \quad (52)$$

Let us take expectation of both sides of (52) conditioned on  $x^t$  and apply Assumption 9:

$$\begin{aligned} \mathbb{E}[f(x^{t+1})|x^t] &\leq f(x^t) - \gamma b \|\nabla f(x^t)\|^2 + c\gamma \\ &\quad + \frac{L\gamma^2}{2} (2A(f(x^t) - f^*) + B \|\nabla f(x^t)\|^2 + C) \\ &= f(x^t) - \gamma \left(b - \frac{LB\gamma}{2}\right) \|\nabla f(x^t)\|^2 \\ &\quad + LA\gamma^2 (f(x^t) - f^*) + \frac{LC\gamma^2}{2} + c\gamma. \end{aligned} \quad (53)$$

Subtract  $f^*$  from both sides. Take expectation on both sides and use the tower property. For every  $t \geq 0$ , put  $\delta^t \stackrel{\text{def}}{=} \mathbb{E}[f(x^t) - f^*]$  and  $r^t \stackrel{\text{def}}{=} \mathbb{E}[\|\nabla f(x^t)\|^2]$ . We obtain that

$$\gamma \left(b - \frac{LB\gamma}{2}\right) r^t \leq (1 + LA\gamma^2) \delta^t - \delta^{t+1} + \frac{LC\gamma^2}{2} + c\gamma.$$

Due to our choice of stepsize (51), we obtain that

$$\frac{\gamma b}{2} r^t \leq (1 + LA\gamma^2) \delta^t - \delta^{t+1} + \frac{LC\gamma^2}{2} + c\gamma. \quad (54)$$

Fix  $w_{-1} > 0$  and, for all  $t \geq 0$ , define  $w_t = \frac{w_{t-1}}{1+LA\gamma^2}$ . Multiplying both sides of (54) by  $\frac{w_t}{\gamma}$ , we obtain

$$\frac{bw_t r^t}{2} \leq \frac{w_{t-1}}{\gamma} \delta^t - \frac{w_t}{\gamma} \delta^{t+1} + \frac{LC\gamma w_t}{2} + \frac{cw_t}{2}.$$

For every  $0 \leq t \leq T-1$ , sum these inequalities. We arrive at

$$\frac{b}{2} \sum_{t=0}^{T-1} w_t r^t \leq \frac{w_{-1}}{\gamma} \delta^0 - \frac{w_{T-1}}{\gamma} \delta^T + \frac{LC\gamma + c}{2} \sum_{t=0}^{T-1} w_t. \quad (55)$$

■

#### E.5 Proof of Theorem 3

From (55) we derive that

$$\frac{b}{2} \sum_{t=0}^{T-1} w_t r^t \leq \frac{w_{-1}}{\gamma} \delta^0 + \frac{LC\gamma + c}{2} \sum_{t=0}^{T-1} w_t. \quad (56)$$

Observe that we can obtain the following lower bound on a sum of weights:

$$\sum_{t=0}^{T-1} w_t \geq T w_{T-1} = \frac{T w_{-1}}{(1 + LA\gamma^2)^T}.$$

Dividing both parts of (56) by  $\sum_{t=0}^{T-1} w_t$  and using the lower bound on it, we get the statement of Theorem 3:

$$\min_{0 \leq t \leq T-1} r^t \leq \frac{2(1 + LA\gamma^2)^T}{b\gamma T} \delta^0 + \frac{LC\gamma}{b} + \frac{c}{b}.$$

■

## E.6 Proof of Corollary 4

We bound each term in the right-hand side of (20) by  $\frac{c}{b}$ .

If  $\gamma = \frac{1}{\sqrt{LAT}}$ , and if  $T \geq \frac{36(\delta^0)^2 LA}{c^2}$ , then we have

$$\frac{2(1 + LA\gamma^2)^T}{b\gamma T} \delta^0 \leq \frac{6\delta^0 \sqrt{LA}}{b\sqrt{T}} \leq \frac{c}{b}.$$

If  $\gamma = \frac{b}{LB}$ , and if  $T \geq \frac{6LB\delta^0}{bc}$ , then we obtain

$$\frac{2(1 + LA\gamma^2)^T}{b\gamma T} \delta^0 \leq \frac{6LB\delta^0}{bT} \leq \frac{c}{b}.$$

If  $\gamma = \frac{c}{LC}$ , and if  $T \geq \frac{6LC\delta^0}{c^2}$ , then we obtain

$$\frac{2(1 + LA\gamma^2)^T}{\gamma T} \delta^0 \leq \frac{6LC\delta^0}{bcT} \leq \frac{c}{b}.$$

Due to the choice of  $\gamma$ , we have  $\frac{LC\gamma}{b} \leq \frac{c}{b}$ . The last term is  $\frac{c}{b}$  itself.

Therefore, we obtain

$$\min_{0 \leq t \leq T-1} \mathbb{E} [\|\nabla f(x^t)\|^2] \leq \frac{3c}{b}.$$

■

## E.7 Proof of Corollary 5

The proof is easy: one needs to substitute  $b$  for 1 and  $c$  for 0 in (20).

■

## E.8 Proof of Corollary 6

We bound each term in the right-hand side of (50) by  $\frac{\varepsilon^2}{2}$ .

If  $\gamma = \frac{1}{\sqrt{LAT}}$ , and if  $T \geq \frac{144(\delta^0)^2 LA}{\varepsilon^4}$ , then we have

$$\frac{2(1 + LA\gamma^2)^T}{\gamma T} \delta^0 \leq \frac{6\delta^0 \sqrt{LA}}{\sqrt{T}} \leq \frac{\varepsilon^2}{2}.$$

If  $\gamma = \frac{1}{LB}$ , and if  $T \geq \frac{12LB\delta^0}{\varepsilon^2}$ , then we obtain

$$\frac{2(1 + LA\gamma^2)^T}{\gamma T} \delta^0 \leq \frac{6LB\delta^0}{T} \leq \frac{\varepsilon^2}{2}.$$

If  $\gamma = \frac{\varepsilon}{2LC}$ , and if  $T \geq \frac{24LC\delta^0}{\varepsilon^4}$ , then we obtain

$$\frac{2(1 + LA\gamma^2)^T}{\gamma T} \delta^0 \leq \frac{12LC\delta^0}{\varepsilon^2 T} \leq \frac{\varepsilon^2}{2}.$$

Due to the choice of  $\gamma$ , we have  $LC\gamma \leq \frac{\varepsilon^2}{2}$ .

Therefore, we obtain

$$\min_{0 \leq t \leq T-1} \mathbb{E} [\|\nabla f(x^t)\|] \leq \varepsilon.$$

■

## E.9 Proof of Corollary 7

When  $A = 0$ , from (20) we have that

$$\min_{0 \leq t \leq T-1} r^t \leq \frac{2}{b\gamma T} \delta^0 + \frac{LC\gamma}{b} + \frac{c}{b}.$$

If  $\gamma = \frac{\varepsilon b}{2LC}$  and  $T \geq \frac{8\delta^0 LC}{b^2 \varepsilon^2}$ , then we get that

$$\frac{2}{b\gamma T} \delta^0 = \frac{4LC\delta^0}{b^2 T \varepsilon} \leq \frac{\varepsilon}{2}, \quad \frac{LC\gamma}{b} \leq \frac{\varepsilon}{2}.$$

If  $\gamma = \frac{b}{LB}$  and  $T \geq \frac{4\delta^0 LB}{b^2 T}$ , then we obtain that

$$\frac{2}{b\gamma T} \delta^0 = \frac{2LB\delta^0}{b^2 T} \leq \frac{\varepsilon}{2}, \quad \frac{LC\gamma}{b} = \frac{LC}{b} \cdot \frac{b}{LB} \leq \frac{LC}{b} \cdot \frac{\varepsilon b}{2LC} = \frac{\varepsilon}{2}.$$

It follows that  $\min_{0 \leq t \leq T-1} r^t = \mathcal{O}(\varepsilon + \frac{\varepsilon}{b})$ .

■

## E.10 Proof of Corollary 8

It follows from (20), that when  $A = c = 0$ , holds

$$\min_{0 \leq t \leq T-1} \mathbb{E} [\|\nabla f(x^t)\|^2] \leq \frac{2\delta^0}{b\gamma T} + \frac{LC\gamma}{b}.$$

If  $\gamma = \frac{b\varepsilon}{2LC}$ , and  $T \geq \frac{8L\delta^0 C}{b^2 \varepsilon^2}$ , then we have that

$$\frac{LC\gamma}{b} \leq \frac{\varepsilon}{2}, \quad \frac{2\delta^0}{b\gamma T} = \frac{4\delta^0 LC}{b^2 \varepsilon T} \leq \frac{\varepsilon}{2}.$$

if  $\gamma = \frac{b}{LB}$ , and  $T \geq \frac{4\delta^0 LB}{b^2 \varepsilon}$ , then we obtain that

$$\frac{LC\gamma}{b} \leq \frac{b\varepsilon}{2LC} \cdot \frac{LC}{b} = \frac{\varepsilon}{2}, \quad \frac{2\delta^0}{b\gamma T} = \frac{2\delta^0 LB}{b^2 T} \leq \frac{\varepsilon}{2}.$$

It follows that  $\min_{0 \leq t \leq T-1} \mathbb{E} [\|\nabla f(x^t)\|^2] \leq \varepsilon$ .

■

## F Convergence under PL-condition (assumption 10)

In Section 6.2 we have formulated Theorem 4 on convergence of [BiasedSGD](#) under Biased ABC assumption and compared the rate obtained to the known convergence results subject to PL-condition. Below we present recent results, derive several corollaries from Theorem 4 and make a formal comparison of our results to the known results.

### F.1 Corollaries from Theorem 4

As before in the general nonconvex case, Theorem 4 guarantees the convergence towards some neighborhood of the  $\varepsilon$ -stationary point, that can not be made less than  $\frac{c}{\mu b}$ . Therefore, we have the following corollary.

**Corollary 9** Choose stepsize  $\gamma > 0$  as  $\gamma = \min \left\{ \frac{\mu b}{L(A+\mu B)}, \frac{1}{2\mu b}, \frac{2c}{LC} \right\}$ . Then, if

$$T \geq \max \left\{ 2, \frac{L(A+\mu B)}{\mu^2 b^2}, \frac{LC}{2c\mu b} \right\} \log \frac{\mu b \delta^0}{c},$$

we have

$$\mathbb{E} [f(x^T) - f^*] \leq \frac{3c}{\mu b}.$$

Without bias terms, we recover the best known rates under Polyak–Łojasiewicz condition (Karimi et al. [2016]) subject to milder conditions.

**Corollary 10** Suppose  $c = 0$ . Choose the stepsize  $\gamma > 0$  as  $\gamma = \min \left\{ \frac{\mu b}{L(A+\mu B)}, \frac{1}{2\mu b}, \frac{\varepsilon \mu b}{LC} \right\}$ . Then, if

$$T \geq \max \left\{ 2, \frac{L(A+\mu B)}{\mu^2 b^2}, \frac{LC}{\varepsilon \mu^2 b^2} \right\} \log \frac{2\delta^0}{\varepsilon},$$

we have

$$\mathbb{E} [f(x^T) - f^*] \leq \varepsilon.$$

Plugging in  $A = 0$ , we recover the result similar to the one obtained in Theorem 6 of [Ajalloeian and Stich, 2020]. However, we impose weaker assumptions (compare Biased ABC and BND in Figure 1; see also Claim 1).

**Corollary 11** Suppose  $A = 0, b \leq 1$ . Choose stepsize  $\gamma > 0$  as  $\gamma = \min \left\{ \frac{b}{BL}, \frac{\varepsilon \mu b + 2c}{LC} \right\}$ . Then, for  $\varepsilon > 0$ , we have that

$$\mathcal{T} = \mathcal{O} \left( \max \left\{ \frac{B}{b}, \frac{C}{\varepsilon \mu b + 2c} \right\} \frac{\kappa}{b} \log \frac{2\delta^0}{\varepsilon} \right)$$

iterations suffice for

$$\mathbb{E} [f(x^T) - f^*] = \mathcal{O} \left( \varepsilon + \frac{2c}{\mu b} \right).$$

If we substitute  $B$  for  $2(M+1)(m+1)$ ,  $C$  for  $2(M+1)\varphi^2 + \sigma^2$ ,  $b$  for  $\frac{1-m}{2}$ ,  $c$  for  $\frac{\varphi^2}{2}$  in accordance with Theorem 13 (see also Table 1), Corollary 11 yields the rate of  $\mathcal{O} \left( \max \left\{ \frac{2(M+1)(m+1)}{1-m}, \frac{2(M+1)\varphi^2 + \sigma^2}{\varepsilon \mu(1-m) + 2\varphi^2} \right\} \frac{\kappa}{1-m} \log \frac{2\delta^0}{\varepsilon} \right)$  which is worse by an additive term of  $\mathcal{O} \left( \frac{(M+1)\varphi^2}{\varepsilon \mu(1-m) + 2\varphi^2} \frac{\kappa}{1-m} \log \frac{2\delta^0}{\varepsilon} \right)$  than the rate granted by Theorem 6 of Ajalloeian and Stich [2020].

### F.2 Proof of Theorem 4.

Due to (53) and Assumption 10, we have

$$\begin{aligned} \mathbb{E} [f(x^{t+1}) | x^t] &\leq f(x^t) - 2\gamma\mu \left( b - \frac{LB\gamma}{2} \right) (f(x^t) - f^*) \\ &\quad + 2\gamma^2 \frac{LA}{2} (f(x^t) - f^*) + \frac{LC\gamma^2}{2} + c\gamma \\ &= f(x^t) - 2\gamma (f(x^t) - f^*) \left[ \mu \left( b - \frac{LB\gamma}{2} \right) - \frac{LA\gamma}{2} \right] + \frac{LC\gamma^2}{2} + c\gamma. \end{aligned}$$

Subtract  $f^*$  from both sides. Take expectation of both sides and use the tower property. Applying inequality (21), we obtain

$$\mathbb{E} [f(x^{t+1}) - f^*] \leq (1 - \gamma\mu b) \mathbb{E} [f(x^t) - f^*] + \frac{LC\gamma^2}{2} + c\gamma.$$

Unrolling the recursion, we arrive at

$$\mathbb{E} [f(x^T) - f^*] \leq (1 - \gamma\mu b)^T \mathbb{E} [f(x^0) - f^*] + \frac{LC\gamma}{2\mu b} + \frac{c}{\mu b}.$$

■

### F.3 Proof of Corollary 9

We bound every term of (22) by  $\frac{c}{\mu b}$ .

If  $\gamma = \frac{\mu b}{L(A+\mu B)}$ , and if  $T \geq \frac{L(A+\mu B)}{\mu^2 b^2} \log \frac{\mu b \delta^0}{c}$ , we have

$$(1 - \gamma\mu b)^T \delta^0 = \left(1 - \frac{1}{L(A+\mu B)}\right)^T \delta^0 \leq e^{-\frac{T}{L(A+\mu B)}} \delta^0 \leq \frac{c}{\mu b}.$$

If  $\gamma = \frac{1}{2\mu b}$ , and if  $T \geq 2 \log \frac{\mu b \delta^0}{c}$ , we have

$$(1 - \gamma\mu b)^T \delta^0 \leq e^{-\frac{T}{2}} \delta^0 \leq \frac{c}{\mu b}.$$

If  $\gamma = \frac{2c}{LC}$ , and if  $T \geq \frac{LC}{2c\mu b} \log \frac{\mu b \delta^0}{c}$ , we have

$$(1 - \gamma\mu b)^T \delta^0 = \left(1 - \frac{2c\mu b}{LC}\right)^T \delta^0 \leq e^{-\frac{2c\mu b T}{LC}} \delta^0 \leq \frac{c}{\mu b}.$$

Due to the choice of  $\gamma$ , we have  $\frac{LC\gamma}{2\mu b} \leq \frac{c}{\mu b}$ .

Therefore, we obtain that  $\mathbb{E} [f(x^T) - f^*] \leq \frac{3c}{\mu b}$ .

■

### F.4 Proof of Corollary 10

If we substitute  $c$  for 0 in (22), then, for every  $T \geq 1$ , we obtain

$$\mathbb{E} [f(x^T) - f^*] \leq (1 - \gamma\mu b)^T \delta^0 + \frac{LC\gamma}{2\mu b}.$$

We bound every term in the right-hand side of the latter inequality by  $\frac{\varepsilon}{2}$ .

If  $\gamma = \frac{\mu b}{L(A+\mu B)}$ , and if  $T \geq \frac{L(A+\mu B)}{\mu^2 b^2} \log \frac{2\delta^0}{\varepsilon}$ , then we have

$$(1 - \gamma\mu b)^T \delta^0 = \left(1 - \frac{\mu^2 b^2}{L(A+\mu B)}\right)^T \delta^0 \leq e^{-\frac{\mu^2 b^2 T}{L(A+\mu B)}} \delta^0 \leq \frac{\varepsilon}{2}.$$

If  $\gamma = \frac{1}{2\mu b}$ , and if  $T \geq 2 \log \frac{2\delta^0}{\varepsilon}$ ,

$$(1 - \gamma\mu b)^T \delta^0 \leq e^{-\frac{T}{2}} \delta^0 \leq \frac{\varepsilon}{2}.$$

If  $\gamma = \frac{\varepsilon\mu b}{LC}$ , and if  $T \geq \frac{LC}{\varepsilon\mu^2 b^2} \log \frac{2\delta^0}{\varepsilon}$ , then we have

$$(1 - \gamma\mu b)^T \delta^0 = \left(1 - \frac{\mu^2 b^2 \varepsilon}{LC}\right)^T \delta^0 \leq e^{-\frac{\mu^2 b^2 \varepsilon T}{LC}} \delta^0 \leq \frac{\varepsilon}{2}.$$

Due to the choice of  $\gamma$ , we have  $\frac{LC\gamma}{2\mu b} \leq \frac{\varepsilon}{2}$ .

Then, if

$$T \geq \max \left\{ 2, \frac{L(A+\mu B)}{\mu^2 b^2}, \frac{LC}{\varepsilon\mu^2 b^2} \right\} \log \frac{2\delta^0}{\varepsilon},$$

we obtain  $\mathbb{E} [f(x^T) - f^*] \leq \varepsilon$ .

■

## E.5 Proof of Corollary 11

From (22), when  $A = 0$ ,  $b \leq 1$ ,  $0 < \gamma < \min \left\{ \frac{b}{LB}, \frac{1}{\mu b} \right\}$ , for every  $T \geq 1$ , we have

$$\mathbb{E} [f(x^T) - f^*] \leq (1 - \gamma\mu b)^T \delta^0 + \frac{LC\gamma}{2\mu b} + \frac{c}{\mu b}.$$

Observe that  $\frac{b}{LB} \leq \frac{1}{\mu b}$ . Let  $\gamma = \min \left\{ \frac{b}{LB}, \frac{\varepsilon\mu b + 2c}{LC} \right\}$ .

If minimum is attained when  $\gamma = \frac{b}{LB}$ , then we have that  $\frac{C}{\mu B} - \frac{2c}{\mu b} \leq \varepsilon$ . If  $T \geq \frac{B}{b} \frac{\kappa}{b} \log \frac{2\delta^0}{\varepsilon}$ , then

$$(1 - \gamma\mu b)^T \delta^0 + \frac{LC\gamma}{2\mu b} + \frac{c}{\mu b} \leq e^{-\frac{T\mu b^2}{BL}} \delta^0 + \frac{C}{2\mu B} + \frac{c}{\mu b} \leq \varepsilon + \frac{2c}{\mu b}.$$

If  $\gamma = \frac{\varepsilon\mu b + 2c}{LC}$  and  $T \geq \frac{C}{\varepsilon\mu b + 2c} \frac{\kappa}{b} \log \frac{2\delta^0}{\varepsilon}$ , then

$$(1 - \gamma\mu b)^T \delta^0 + \frac{LC\gamma}{2\mu b} + \frac{c}{\mu b} \leq e^{-\frac{T\mu b(\varepsilon\mu b + 2c)}{LC}} \delta^0 + \frac{\varepsilon}{2} + \frac{c}{\mu b} + \frac{c}{\mu b} = \varepsilon + \frac{2c}{\mu b}.$$

Then, if  $T \geq \max \left\{ \frac{B}{b}, \frac{C}{\varepsilon\mu b + 2c} \right\} \frac{\kappa}{b} \log \frac{2\delta^0}{\varepsilon}$ , then  $\mathbb{E} [f(x^T) - f^*] = \mathcal{O} \left( \varepsilon + \frac{2c}{\mu b} \right)$ . ■

## G Strongly convex case

In Section 6.3 we have stated that Theorem 4 on convergence of [BiasedSGD](#) under Biased ABC assumption can be applied in strongly convex settings. We compared the rate obtained to the known convergence results in strongly convex scenario. Below we present recent results, derive several corollaries from Theorem 4 and make a formal comparison of our results to the known results.

### G.1 Known results for convergence in function values

The next theorem is Theorem 4.6 from [Bottou et al., 2018].

**Theorem 8** *Let Assumptions 0, 8 and 11 hold. Then, as long as  $0 < \gamma \leq \frac{q}{L(U+u^2)}$ , for all  $T \geq 1$ , we have*

$$\mathbb{E} [f(x^T) - f(x^*)] \leq (1 - \gamma\mu q)^T \left( \delta^0 - \frac{\gamma LQ}{2\mu q} \right) + \frac{\gamma LQ}{2\mu q}.$$

Let us derive the convergence rate in Theorem 8 to compare it to our result obtained in the next section.

**Corollary 12** *Choose stepsize  $\gamma > 0$  as  $\gamma = \min \left\{ \frac{q}{L(U+u^2)}, \frac{\varepsilon\mu q}{LQ}, \frac{1}{2\mu q} \right\}$ . Then, if*

$$T \geq \max \left\{ 2, \frac{L(U+u^2)}{q^2\mu}, \frac{LQ}{\varepsilon\mu^2q^2} \right\} \log \frac{2\delta^0}{\varepsilon},$$

*we have*

$$\mathbb{E} [f(x^T) - f(x^*)] \leq \varepsilon.$$

Next three theorems are analogues of Theorems 12 – 14 from [Beznosikov et al., 2020] respectively.

**Theorem 9** *Let Assumptions 0 and 11 hold. Let  $g \in \mathbb{B}^1(\alpha, \beta)$  (that is, let Assumption 1 be satisfied). Then as long as  $0 \leq \gamma \leq \frac{2}{\beta L}$ , for all  $t \in \mathbb{N}$ , we have*

$$\mathbb{E} [f(x^t) - f(x^*)] \leq \left( 1 - \frac{\alpha}{\beta} \gamma \mu (2 - \gamma \beta L) \right)^t (f(x^0) - f(x^*)).$$

*If we choose  $\gamma = \frac{1}{\beta L}$ , then*

$$\mathbb{E} [f(x^t) - f(x^*)] \leq \left( 1 - \frac{\alpha}{\beta^2} \frac{\mu}{L} \right)^t (f(x^0) - f(x^*)).$$

**Theorem 10** *Let Assumptions 0 and 11 hold. Let  $g \in \mathbb{B}^2(\tau, \beta)$  (that is, let Assumption 2 be satisfied). Then as long as  $0 \leq \gamma \leq \frac{2}{\beta L}$ , for all  $t \in \mathbb{N}$ , we have*

$$\mathbb{E} [f(x^t) - f(x^*)] \leq (1 - \tau\gamma\mu(2 - \gamma\beta L))^t (f(x^0) - f(x^*)).$$

*If we choose  $\gamma = \frac{1}{\beta L}$ , then*

$$\mathbb{E} [f(x^t) - f(x^*)] \leq \left(1 - \frac{\tau\mu}{\beta L}\right)^t (f(x^0) - f(x^*)).$$

**Theorem 11** *Let Assumptions 0 and 11 hold. Let  $g \in \mathbb{B}^3(\delta)$  (that is, let Assumption 3 be satisfied). Then as long as  $0 \leq \gamma \leq \frac{1}{L}$ , for all  $t \in \mathbb{N}$ , we have*

$$\mathbb{E} [f(x^t) - f(x^*)] \leq \left(1 - \frac{\gamma\mu}{\delta}\right)^t (f(x^0) - f(x^*)).$$

*If we choose  $\gamma = \frac{1}{L}$ , then*

$$\mathbb{E} [f(x^t) - f(x^*)] \leq \left(1 - \frac{\mu}{\delta L}\right)^t (f(x^0) - f(x^*)).$$

The authors of [Beznosikov et al., 2020] make the following observation. For every gradient estimator  $g \in \mathbb{B}^1(\alpha, \beta)$ , there exists a unique gradient estimator  $\frac{1}{\beta}g \in \mathbb{B}^3\left(\frac{\beta^2}{\alpha}\right)$ . By Theorem 11, we get the bound of  $\mathcal{O}\left(\frac{\beta^2}{\alpha} \frac{L}{\mu} \log \frac{1}{\varepsilon}\right)$  on  $\mathcal{T}$  which coincides with the result of Theorem 9 applied to  $g$ . If  $g \in \mathbb{B}^3(\delta)$ , then  $g \in \mathbb{B}^1\left(\frac{1}{4\delta^2}, 2\right)$ . Applying Theorem 9, we get that  $\mathcal{O}\left(16\delta^2 \frac{L}{\mu} \log \frac{1}{\varepsilon}\right)$  which is worse than the result of Theorem 11 by a factor of  $16\delta$ . For every  $g \in \mathbb{B}^2(\tau, \beta)$ , there exists a unique  $g \in \mathbb{B}^1(\tau^2, \beta)$ . Applying Theorem 10 we obtain  $\mathcal{O}\left(\frac{\beta}{\tau} \frac{L}{\mu} \log \frac{1}{\varepsilon}\right)$ , whence applying Theorem 9 we obtain  $\mathcal{O}\left(\frac{\beta^2}{\tau^2} \frac{L}{\mu} \log \frac{1}{\varepsilon}\right)$ . Since  $\beta \geq \tau$ , the second result is worse by a factor of  $\frac{\beta}{\tau}$ .

## G.2 Convergence in function values: our results

Observe that Assumption 10 is more general than Assumption 11. Therefore, Theorem 4 can be applied to functions that satisfy Assumption 11.

**Theorem 12** *Let Assumptions 0, 9 and 11 hold. Choose a stepsize such that*

$$0 < \gamma < \min \left\{ \frac{\mu b}{L(A + \mu B)}, \frac{1}{\mu b} \right\}.$$

*Then, for every  $T \geq 1$ , we have*

$$\mathbb{E} [f(x^T) - f(x^*)] \leq (1 - \gamma\mu b)^T \delta^0 + \frac{LC\gamma}{2\mu b} + \frac{c}{\mu b}, \quad (57)$$

*where  $\delta^0 = f(x^0) - f(x^*)$ .*

Clearly, all of the corollaries from Theorem 4 hold in the strongly convex setup as well. Therefore, we do not write them here again.

Observe that if  $A = c = 0$ , we recover the result of Theorem 8 (see Theorem 4.6 from [Bottou et al., 2018]).

**Corollary 13** *Suppose  $A = c = 0$ . Choose stepsize  $\gamma > 0$  as  $\gamma = \min \left\{ \frac{b}{LB}, \frac{\varepsilon b \mu}{LC}, \frac{1}{2\mu b} \right\}$ . Then, if*

$$T \geq \max \left\{ 2, \frac{LB}{b^2 \mu}, \frac{LC}{\varepsilon b^2 \mu^2} \right\} \log \frac{2\delta^0}{\varepsilon},$$

*we have*

$$\mathbb{E} [f(x^T) - f(x^*)] \leq \varepsilon.$$

To recover the result from Corollary 12, one needs to substitute  $B$  for  $U + u^2$ ,  $C$  for  $Q$ ,  $b$  for  $q$  in accordance with the representation of Assumption 8 in Biased ABC framework (see Theorem 13 and Table 1).

Observe that if  $A = C = c = 0$ , we retrieve the results similar to Theorems 9 – 11.

**Corollary 14** *Suppose  $A = C = c = 0$ . Choose stepsize  $\gamma > 0$  as  $\gamma = \frac{b}{LB}$ . Then, for every  $T \geq 1$ , we have*

$$\mathbb{E} [f(x^T) - f(x^*)] \leq \left(1 - \frac{b^2\mu}{BL}\right)^T \delta^0.$$

If  $T \geq \frac{BL}{b^2\mu} \log \frac{\delta^0}{\varepsilon}$ , then we have

$$\mathbb{E} [f(x^T) - f(x^*)] \leq \varepsilon.$$

If we substitute  $B$  for  $\beta^2$ ,  $b$  for  $\frac{\alpha}{\beta}$  (see Theorem 13 and Table 1), Corollary 14 yields the rate of  $\mathcal{O}\left(\frac{\beta^4}{\alpha^2} \frac{L}{\mu} \log \frac{\delta^0}{\varepsilon}\right)$ , which is worse by a factor of  $\frac{\beta^2}{\alpha}$  than the rate granted by Theorem 9 [Beznosikov et al., 2020, Theorem 12].

If we substitute  $B$  for  $\beta^2$ ,  $b$  for  $\tau$  (see Theorem 13 and Table 1), Corollary 14 yields the rate of  $\mathcal{O}\left(\frac{\beta^2}{\tau^2} \frac{L}{\mu} \log \frac{\delta^0}{\varepsilon}\right)$ , which is worse by a factor of  $\frac{\beta}{\tau}$  than the rate granted by Theorem 10 [Beznosikov et al., 2020, Theorem 13].

If we substitute  $B$  for  $2\left(2 - \frac{1}{\delta}\right)$ ,  $b$  for  $\frac{1}{2\delta}$  (see Theorem 13 and Table 1), Corollary 14 yields the rate of  $\mathcal{O}\left(\delta^2 \frac{L}{\mu} \log \frac{\delta^0}{\varepsilon}\right)$ , which is worse by a factor of  $\delta$  than the rate granted by Theorem 11 [Beznosikov et al., 2020, Theorem 14].

### G.3 Proof of Corollary 12

If  $\gamma = \frac{q}{L(U+u^2)}$  and  $T \geq \frac{L(U+u^2)}{q^2\mu} \log \frac{2\delta^0}{\varepsilon}$ , then

$$(1 - \gamma\mu q)^T \left(\delta^0 - \frac{\gamma LQ}{2\mu q}\right) \leq \left(1 - \frac{q^2\mu}{L(U+u^2)}\right)^T \delta^0 \leq e^{-\frac{q^2\mu T}{L(U+u^2)}} \delta^0 \leq \frac{\varepsilon}{2}.$$

If  $\gamma = \frac{\varepsilon\mu q}{LQ}$  and  $T \geq \frac{LQ}{\varepsilon\mu^2 q^2} \log \frac{2\delta^0}{\varepsilon}$ , then

$$(1 - \gamma\mu q)^T \left(\delta^0 - \frac{\gamma LQ}{2\mu q}\right) \leq \left(1 - \frac{\varepsilon\mu^2 q^2}{LQ}\right)^T \delta^0 \leq e^{-\frac{\varepsilon\mu^2 q^2 T}{LQ}} \delta^0 \leq \frac{\varepsilon}{2}.$$

If  $\gamma = \frac{1}{2\mu q}$  and  $T \geq 2 \log \frac{2\delta^0}{\varepsilon}$ , then

$$(1 - \gamma\mu q)^T \left(\delta^0 - \frac{\gamma LQ}{2\mu q}\right) \leq e^{-\frac{T}{2}} \delta^0 \leq \frac{\varepsilon}{2}.$$

Due to the choice of  $\gamma$ , we have  $\frac{\gamma LQ}{2\mu q} \leq \frac{\varepsilon}{2}$ .

Then, if

$$T \geq \max \left\{ 2, \frac{L(U+u^2)}{q^2\mu}, \frac{LQ}{\varepsilon\mu^2 q^2} \right\} \log \frac{2\delta^0}{\varepsilon},$$

we obtain  $\mathbb{E} [f(x^T) - f(x^*)] \leq \varepsilon$ . ■

### G.4 Proof of Theorem 12

Follow exactly the same steps as in the proof of Theorem 4. ■

### G.5 Proof of Corollary 13

If  $\gamma = \frac{b}{LB}$  and  $T \geq \frac{LB}{b^2\mu} \log \frac{2\delta^0}{\varepsilon}$ , then

$$(1 - \gamma\mu b)^T \delta^0 = \left(1 - \frac{b^2\mu}{LB}\right)^T \delta^0 \leq e^{-\frac{Tb^2\mu}{LB}} \delta^0 \leq \frac{\varepsilon}{2}.$$

If  $\gamma = \frac{\varepsilon b\mu}{LC}$  and  $T \geq \frac{LC}{\varepsilon b^2\mu^2} \log \frac{2\delta^0}{\varepsilon}$ , then

$$(1 - \gamma\mu b)^T \delta^0 = \left(1 - \frac{\varepsilon b^2\mu^2}{LC}\right)^T \delta^0 \leq e^{-\frac{T\varepsilon b^2\mu^2}{LC}} \delta^0 \leq \frac{\varepsilon}{2}.$$

If  $\gamma = \frac{1}{2\mu b}$  and  $T \geq 2 \log \frac{2\delta^0}{\varepsilon}$ , then

$$(1 - \gamma\mu b)^T \delta^0 \leq e^{-\frac{T}{2}} \delta^0 \leq \frac{\varepsilon}{2}.$$

Due to the choice of  $\gamma$ , we have  $\frac{LC\gamma}{2\mu b} \leq \frac{\varepsilon}{2}$ . Then, if

$$T \geq \max \left\{ 2, \frac{LB}{b^2\mu}, \frac{LC}{\varepsilon b^2\mu^2} \right\} \log \frac{2\delta^0}{\varepsilon},$$

we obtain  $\mathbb{E} [f(x^T) - f(x^*)] \leq \varepsilon$ . ■

### G.6 Proof of Corollary 14

Consider (57) and recall that  $A = C = c = 0$ . Note that in this case  $\frac{\mu b}{L(A+\mu B)} = \frac{b}{LB}$  is no greater than  $\frac{1}{\mu b}$ . Indeed,

$$b \|\nabla f(x)\|^2 \leq \langle \mathbb{E}[g(x)], \nabla f(x) \rangle \leq \|\mathbb{E}[g(x)]\| \cdot \|\nabla f(x)\|$$

(by Cauchy–Schwarz inequality), which (combined with Biased ABC) leads to

$$b^2 \|\nabla f(x)\|^2 \leq \|\mathbb{E}[g(x)]\|^2 \leq \mathbb{E} [\|g(x)\|^2] \leq B \|\nabla f(x)\|^2.$$

Therefore, we have that  $b^2 \leq B$ . Then,  $b^2 \leq \frac{L}{\mu} B \iff \frac{b}{LB} \leq \frac{1}{\mu b}$ .

Hence, we can choose  $\gamma = \frac{b}{LB}$ , which yields that

$$\mathbb{E} [f(x^T) - f(x^*)] \leq \left(1 - \frac{b^2\mu}{LB}\right)^T \delta^0.$$

If  $T \geq \frac{LB}{b^2\mu} \log \frac{\delta^0}{\varepsilon}$ , then

$$\left(1 - \frac{b^2\mu}{LB}\right)^T \delta^0 \leq e^{-\frac{Tb^2\mu}{LB}} \delta^0 \leq \varepsilon. \quad \blacksquare$$

### G.7 Iterate convergence: further discussion

In Section 6.3 we introduce strict Assumption 12 and formulate convergence Theorem 5 subject to this condition. It is reasonable to ask whether Assumption 12 is realistic. In this part of the appendix we give a useful example of a setting that meets the requirements of the assumption imposed.

It is easy to see that Assumption 12 holds only when  $b$  is relatively large, and  $A$  is small, which is not necessarily the case in practice. However, let us show that it can be satisfied. Consider the  $\ell_2$ -regularized logistic regression with  $f_j = \log(1 + e^{-b_j \langle e_j, x \rangle}) + \frac{1}{2} \|x\|^2$ , where  $e_j$  is the  $j$ -th unit vector,  $b_j \in \{0, 1\}$ ,  $j \in [n]$ ,  $n \geq 2$ . It is straightforward to show that all  $f_j$  and  $f = \frac{1}{n} \sum_{j=1}^n f_j$  are  $\frac{5}{4}$ -smooth and 1-strongly-convex. Consider the estimator from Definition 2, and let  $a_k = k$ ,  $k \in \mathbb{N} \cup \{0\}$ ,  $p_j = \frac{1}{5}$ . From (27)–(31), we obtain that  $A_r = \frac{2}{n}$ ,  $B_r = \frac{2}{5}$ ,  $C_r = \frac{4\Delta^*}{n}$ ,  $b_r = \frac{4}{5}$ ,  $c_r = 0$ . Then Assumption 12 holds since  $\frac{2}{n} - \frac{1}{4} < 1$ .

### G.8 Proof of Theorem 5

Let  $r^t \stackrel{\text{def}}{=} x^t - x^*$ . We get

$$\|r^{t+1}\|^2 = \|(x^t - \gamma g^t) - x^*\|^2 = \|x^t - x^* - \gamma g^t\|^2 = \|r^t\|^2 - 2\gamma \langle r^t, g^t \rangle + \gamma^2 \|g^t\|^2.$$

Now we compute expectation of both sides of the inequality, conditional on  $x^t$ :

$$\mathbb{E} \left[ \|r^{t+1}\|^2 | x^t \right] = \|r^t\|^2 - 2\gamma \langle r^t, \mathbb{E}[g^t | x^t] \rangle + \gamma^2 \mathbb{E} \left[ \|g^t\|^2 | x^t \right].$$

Notice that

$$2\langle r^t, \mathbb{E}[g^t | x^t] \rangle = 2\langle r^t, \mathbb{E}[g^t | x^t] - \nabla f(x^t) \rangle + 2\langle r^t, \nabla f(x^t) \rangle.$$

Due to  $\mu$ -convexity, we have

$$\langle r^t, \nabla f(x^t) \rangle \geq D_f(x^t, x^*) + \frac{\mu}{2} \|r^t\|^2. \quad (58)$$

Further, using Young's Inequality (Lemma 3, (68)), we get

$$-2\langle r^t, \mathbb{E}[g^t | x^t] - \nabla f(x^t) \rangle \leq s \|r^t\|^2 + \frac{1}{s} \|\mathbb{E}[g^t | x^t] - \nabla f(x^t)\|^2. \quad (59)$$

Notice that

$$\begin{aligned} \|\mathbb{E}[g^t | x^t] - \nabla f(x^t)\|^2 &= \|\mathbb{E}[g^t | x^t]\|^2 - 2\langle \mathbb{E}[g^t | x^t], \nabla f(x^t) \rangle + \|\nabla f(x^t)\|^2 \\ &\leq 2AD_f(x^t, x^*) + B \|\nabla f(x^t)\|^2 + C \\ &\quad - 2(b \|\nabla f(x^t)\|^2 - c) + \|\nabla f(x^t)\|^2. \end{aligned}$$

Below we use this fact from Lemma 1:

$$\|\nabla f(x^t)\|^2 \leq 2LD_f(x^t, x^*). \quad (60)$$

This leads to

$$\begin{aligned} \mathbb{E} \left[ \|r^{t+1}\|^2 | x^t \right] &\stackrel{(58),(59)}{\leq} (1 - \gamma(\mu - s)) \|r^t\|^2 - 2\gamma D_f(x^t, x^*) \\ &\quad + \gamma^2 \mathbb{E} \left[ \|g^t\|^2 | x^t \right] + \frac{\gamma}{s} \left( \|\mathbb{E}[g^t | x^t] - \nabla f(x^t)\|^2 \right) \\ &\stackrel{(60)}{\leq} (1 - \gamma(\mu - s)) \|r^t\|^2 - 2\gamma D_f(x^t, x^*) \\ &\quad + \gamma^2 \left( 2AD_f(x^t, x^*) + B \|\nabla f(x^t)\|^2 + C \right) \\ &\quad + \frac{\gamma}{s} \left[ 2AD_f(x^t, x^*) + B \|\nabla f(x^t)\|^2 + C \right. \\ &\quad \left. - 2(b \|\nabla f(x^t)\|^2 - c) + \|\nabla f(x^t)\|^2 \right] \\ &= (1 - \gamma(\mu - s)) \|r^t\|^2 \\ &\quad - 2\gamma D_f(x^t, x^*) \left[ 1 - A\gamma - \frac{A}{s} - L \left( \gamma B + \frac{B}{s} - \frac{2b}{s} + \frac{1}{s} \right) \right] + \\ &\quad + \gamma^2 C + \frac{\gamma(C + 2c)}{s}. \end{aligned}$$

Due to (23), we have

$$\mathbb{E} \left[ \|r^{t+1}\|^2 | x^t \right] \leq (1 - \gamma(\mu - s)) \|r^t\|^2 + \gamma^2 C + \frac{\gamma(C + 2c)}{s}.$$

Take expectation again on both sides and use the tower property

$$\mathbb{E} \left[ \|r^{t+1}\|^2 \right] = \mathbb{E} \left[ \mathbb{E} \left[ \|r^{t+1}\|^2 | x^t \right] \right].$$

We arrive at

$$\mathbb{E} \left[ \|r^{t+1}\|^2 \right] \leq (1 - \gamma(\mu - s)) \mathbb{E} \left[ \|r^t\|^2 \right] + \gamma^2 C + \frac{\gamma(C + 2c)}{s}.$$

Unrolling the recurrence and noting that  $\mathbb{E} \left[ \|r^0\|^2 \right] = \|r^0\|^2$  gives us

$$\begin{aligned} \mathbb{E} \left[ \|r^t\|^2 \right] &\leq (1 - \gamma(\mu - s))^t \|r^0\|^2 \\ &\quad + \gamma \left( \gamma C + \frac{C + 2c}{s} \right) \sum_{i=0}^{t-1} (1 - \gamma(\mu - s))^i \\ &\leq (1 - \gamma(\mu - s))^t \|r^0\|^2 + \frac{\gamma C + \frac{C + 2c}{s}}{\mu - s}. \end{aligned}$$

■

## H Assumptions 1–8 in biased ABC framework

In Table 1 we have presented the values of control variables  $A, B, C, b$  and  $c$  in our Biased ABC framework for a gradient estimator that satisfies any of assumptions listed in Section 4. Here we give a formal proof of these results.

**Theorem 13** *The following relations hold.*

i Suppose  $g(x)$  satisfies Assumption 1. Then it satisfies Assumption 9 with  $A = 0, B = \beta^2, C = 0, b = \frac{\alpha}{\beta}, c = 0$ .

ii Suppose  $g(x)$  satisfies Assumption 2. Then it satisfies Assumption 9 with  $A = 0, B = \beta^2, C = 0, b = \tau, c = 0$ .

iii Suppose  $g(x)$  satisfies Assumption 3. Then it satisfies Assumption 9 with  $A = C = c = 0, B = 2 \left( 2 - \frac{1}{\delta} \right), b = \frac{1}{2\delta}$ .

iv Suppose  $g(x)$  satisfies Assumption 4. Then it satisfies Assumption 9 with  $A = C = c = 0, B = 2(1 + \xi + \eta), b = \frac{1-\eta}{2}$ .

v Suppose  $g(x)$  satisfies Assumption 5. Then it satisfies Assumption 9 with  $A = 0, B = \zeta, C = 0, b = \rho, c = 0$ .

vi Suppose  $g(x)$  satisfies Assumption 6. Then it satisfies Assumption 9 with  $A = 0, B = 2(M + 1)(m + 1), C = 2(M + 1)\varphi^2 + \sigma^2, b = \frac{1-m}{2}, c = \frac{\varphi^2}{2}$ .

vii Suppose  $g(x)$  satisfies Assumption 7. Then it satisfies Assumption 9 with  $A = 0, B = 2, C = 2\Delta^2, b = \frac{1}{2}, c = \frac{\Delta^2}{2}$ .

viii Suppose  $g(x)$  satisfies Assumption 8. Then it satisfies Assumption 9 with  $A = 0, B = U + u^2, C = Q, b = q, c = 0$ .

**Proof of Theorem 13.** Let us prove all of the assertions stated in Theorem 13 one by one.

i From (3), we derive that  $\langle \nabla f(x, \mathbb{E}[g(x)]) \rangle \geq \frac{\alpha}{\beta} \|\nabla f(x)\|^2$ . Therefore, we can choose  $b = \frac{\alpha}{\beta}, c = 0$ . From (5), we obtain that  $A = 0, B = \beta^2, C = 0$ .

ii From (4), we derive that  $\langle \nabla f(x, \mathbb{E}[g(x)]) \rangle \geq \tau \|\nabla f(x)\|^2$ . Therefore, we can choose  $b = \tau, c = 0$ . From (5), we obtain that  $A = 0, B = \beta^2, C = 0$ .

iii From (6), we derive that

$$\langle \mathbb{E}[g(x)], \nabla f(x) \rangle \geq \frac{1}{2} \left( \mathbb{E} \left[ \|g(x)\|^2 \right] + \frac{1}{\delta} \|\nabla f(x)\|^2 \right) \geq \frac{1}{2\delta} \|\nabla f(x)\|^2.$$

Further,

$$\begin{aligned}\mathbb{E} \left[ \|g(x)\|^2 \right] &= \mathbb{E} \left[ \|g(x) - \nabla f(x) + \nabla f(x)\|^2 \right] \\ &\leq 2\mathbb{E} \left[ \|g(x) - \nabla f(x)\|^2 \right] + 2\|\nabla f(x)\|^2 \\ &\leq 2 \left( 2 - \frac{1}{\delta} \right) \|\nabla f(x)\|^2.\end{aligned}$$

iv From (8), we derive that

$$\langle \mathbb{E}[g(x)], \nabla f(x) \rangle \geq \frac{1}{2} \left( \|\mathbb{E}[g(x)]\|^2 + (1 - \eta) \|\nabla f(x)\|^2 \right) \geq \frac{1 - \eta}{2} \|\nabla f(x)\|^2.$$

Further, from (7), (8) and (9), we obtain that

$$\begin{aligned}\mathbb{E} \left[ \|g(x)\|^2 \right] &= \mathbb{E} \left[ \|g(x) - \nabla f(x) + \nabla f(x)\|^2 \right] \\ &\leq 2\mathbb{E} \left[ \|g(x) - \nabla f(x)\|^2 \right] + 2\|\nabla f(x)\|^2 \\ &\leq 2(1 + \xi + \eta) \|\nabla f(x)\|^2.\end{aligned}$$

v From (10), we conclude that  $b = \rho$ ,  $c = 0$ . From (11), we derive that  $A = 0$ ,  $B = \zeta$ ,  $C = 0$ .

vi It follows from the proof of Theorem 2–ix.

vii From (14), we have

$$\begin{aligned}\langle \mathbb{E}[g(x)], \nabla f(x) \rangle &\geq \frac{1}{2} \left( \mathbb{E} \left[ \|g(x)\|^2 \right] + \|\nabla f(x)\|^2 \right) - \frac{\Delta^2}{2} \geq \frac{1}{2} \|\nabla f(x)\|^2 - \frac{\Delta^2}{2}, \\ \mathbb{E} \left[ \|g(x)\|^2 \right] &= \mathbb{E} \left[ \|g(x) - \nabla f(x) + \nabla f(x)\|^2 \right] \\ &\leq 2\mathbb{E} \left[ \|g(x) - \nabla f(x)\|^2 \right] + 2\|\nabla f(x)\|^2 \\ &\leq 2\|\nabla f(x)\|^2 + 2\Delta^2.\end{aligned}$$

viii It follows from the proof of Theorem 2–viii. ■

## I New estimators in biased ABC framework: proofs for Section B

In this section we prove the results announced in Section B.

### I.1 Proof of Claim 2

First, let us find constants for (18):

$$\begin{aligned}\langle \nabla f(x), \mathbb{E}[g(x)] \rangle &= \left\langle \frac{1}{n} \sum_{i=1}^n \nabla f_i(x), \mathbb{E} \left[ \frac{1}{|S|} \sum_{i=1}^n v_i \nabla f_i(x) \right] \right\rangle \\ &\geq \left\langle \frac{1}{n} \sum_{i=1}^n \nabla f_i(x), \frac{1}{n} \sum_{i=1}^n \min\{p_i\} \nabla f_i(x) \right\rangle \\ &\geq \min_i \{p_i\} \|\nabla f(x)\|^2.\end{aligned}$$

Second, let us find an upper bound on the variance of the gradient estimator  $g(x)$ . Notice that, since  $\tilde{g}(x)$  is independent of  $X$ , and  $\mathbb{E}[X] = 0$ , we can write that

$$\mathbb{E} \left[ \|g(x)\|^2 \right] = \mathbb{E} \left[ \|\tilde{g}(x)\|^2 \right] + \mathbb{E} \left[ \|X\|^2 \right] = \mathbb{E} \left[ \|\tilde{g}(x)\|^2 \right] + \sigma^2.$$

Clearly,  $\mathbb{E}[\mathbb{I}_i] = p_i$ . Note, that, for  $i \neq j \in [n]$ , random sets  $S_i$  and  $S_j$  are independent, random variables  $\mathbb{I}_i$  and  $\mathbb{I}_j$  are also independent. Therefore,

$$\mathbb{E}[\mathbb{I}_i \mathbb{I}_j] = \mathbb{E}[\mathbb{I}_i] \mathbb{E}[\mathbb{I}_j] = p_i p_j.$$

Further, let us bound the second moment of  $\tilde{g}(x)$  from above:

$$\begin{aligned} \mathbb{E}[\|\tilde{g}(x)\|^2] &= \mathbb{E}\left[\left\|\frac{1}{|S|} \sum_{i=1}^n \mathbb{I}_i \nabla f_i(x)\right\|^2\right] \\ &\leq \mathbb{E}\left[\frac{1}{|S|} \sum_{i=1}^n \mathbb{I}_i \|\nabla f_i(x)\|^2\right] \\ &= \sum_{i=1}^n \mathbb{E}\left[\frac{\mathbb{I}_i}{|S|}\right] \|\nabla f_i(x)\|^2 \\ &\leq \sum_{i=1}^n \mathbb{E}\left[\frac{1}{|S|}\right] \|\nabla f_i(x)\|^2 \\ &\leq \frac{1}{n \min_i \{p_i\}} \sum_{i=1}^n \|\nabla f_i(x)\|^2. \end{aligned}$$

Due to Assumption 13, we obtain that

$$\begin{aligned} \mathbb{E}[\|\tilde{g}(x)\|^2] &\leq \frac{2 \max_i \{L_i\}}{n \min_i \{p_i\}} \sum_{i=1}^n D_{f_i}(x, x^*) \\ &\leq \frac{2 \max_i \{L_i\}}{\min_i \{p_i\}} D_f(x, x^*) + \frac{2 \max_i \{L_i\}}{\min_i \{p_i\}} \Delta^*. \end{aligned}$$

Therefore, we can choose  $A = \frac{\max_i \{L_i\}}{\min_i \{p_i\}}$ ,  $B = 0$ ,  $C = 2A\Delta^* + \sigma^2$ ,  $b = \min_i \{p_i\}$ ,  $c = 0$ . ■

## I.2 Proof of Claim 3

Let us establish (18) first:

$$\langle \nabla f(x), \mathbb{E}[g(x)] \rangle = \left\langle \nabla f(x), \frac{1}{n} \sum_{i=1}^n c_i \nabla f_i(x) \right\rangle \geq \min_i \{c_i\} \|\nabla f(x)\|^2.$$

Further, we establish (19). We use the convexity of the  $k_2$ -norm and Lemma 1.

$$\begin{aligned} \mathbb{E}[\|g(x)\|^2] &\leq \frac{1}{n} \sum_{i=1}^n \mathbb{E}[\|v_i \nabla f_i(x)\|^2] \\ &= \frac{1}{n} \sum_{i=1}^n \mathbb{E}[v_i^2] \|\nabla f_i(x)\|^2 \\ &\leq \frac{2 \max_i \{L_i \mathbb{E}[v_i^2]\}}{n} \sum_{i=1}^n D_{f_i}(x, x^*) \\ &= 2 \max_i \{L_i \mathbb{E}[v_i^2]\} D_f(x, x^*) + 2 \max_i \{L_i \mathbb{E}[v_i^2]\} \Delta^*. \end{aligned}$$
■

### I.3 Proof of Claim 4

First, we establish that (18) holds:

$$\begin{aligned}
\langle \nabla f(x), \mathbb{E}[g(x)] \rangle &= \left\langle \nabla f(x), \frac{1}{n} \sum_{j=1}^n p_j \tilde{g}_j(x) \right\rangle + \left\langle \nabla f(x), \frac{1}{n} \sum_{j=1}^n (1-p_j) \nabla f_j(x) \right\rangle \\
&\geq \max_j \{p_j\} \langle \nabla f(x), \tilde{g}(x) \rangle + \max_j \{1-p_j\} \|\nabla f(x)\|^2 \\
&\geq \left( \max_j \{p_j\} \cdot \inf_{k \in \mathbb{Z}} \frac{2a_k}{a_k + a_{k+1}} + \max_j \{1-p_j\} \right) \|\nabla f(x)\|^2.
\end{aligned}$$

Further, we need to show that (19) is also valid.

$$\begin{aligned}
\mathbb{E} \left[ \|g(x)\|^2 \right] &= \mathbb{E} \left[ \left\| \frac{1}{n} \sum_{j=1}^n \mathbb{I}_j \tilde{g}_j(x) + \frac{1}{n} \sum_{j=1}^n (1-\mathbb{I}_j) \nabla f_j(x) \right\|^2 \right] \\
&\leq 2\mathbb{E} \left[ \left\| \frac{1}{n} \sum_{j=1}^n \mathbb{I}_j \tilde{g}_j(x) \right\|^2 \right] + 2\mathbb{E} \left[ \left\| \frac{1}{n} \sum_{j=1}^n (1-\mathbb{I}_j) \nabla f_j(x) \right\|^2 \right] \\
&= \frac{2}{n^2} \mathbb{E} \left[ \left\| \sum_{j=1}^n \mathbb{I}_j \tilde{g}_j(x) \right\|^2 \right] + \frac{2}{n^2} \mathbb{E} \left[ \left\| \sum_{j=1}^n (1-\mathbb{I}_j) \nabla f_j(x) \right\|^2 \right]. \tag{61}
\end{aligned}$$

Let us deal with each term separately. For the first one we have

$$\begin{aligned}
\mathbb{E} \left[ \left\| \sum_{j=1}^n \mathbb{I}_j \tilde{g}_j(x) \right\|^2 \right] &= \sum_{j=1}^n \mathbb{E} [\mathbb{I}_j^2] \|\tilde{g}_j\|^2 + 2 \sum_{j \neq h} \mathbb{E} [\mathbb{I}_j] \mathbb{E} [\mathbb{I}_h] \langle \tilde{g}_j, \tilde{g}_h \rangle \\
&= \sum_{j=1}^n p_j \|\tilde{g}_j\|^2 + 2 \sum_{j \neq h} p_j p_h \langle \tilde{g}_j, \tilde{g}_h \rangle \\
&= \sum_{j=1}^n p_j (1-p_j) \|\tilde{g}_j\|^2 + \left\| \sum_{j=1}^n p_j \tilde{g}_j \right\|^2.
\end{aligned}$$

From  $L_j$ -smoothness of  $f_j(x)$ ,  $j \in [n]$ , and from Lemma 1, we have that

$$\begin{aligned}
\mathbb{E} \left[ \left\| \sum_{j=1}^n \mathbb{I}_j \tilde{g}_j(x) \right\|^2 \right] &\leq \max_j \{p_j(1-p_j)\} \left( \sup_{k \in \mathbb{Z}} \frac{2a_{k+1}}{a_k + a_{k+1}} \right)^2 \sum_{j=1}^n \|\nabla f_j(x)\|^2 \\
&\quad + n^2 \max_j \{p_j^2\} \left( \sup_{k \in \mathbb{Z}} \frac{2a_{k+1}}{a_k + a_{k+1}} \right)^2 \|\nabla f(x)\|^2 \\
&\leq 2 \max_j \{p_j(1-p_j)\} \left( \sup_{k \in \mathbb{Z}} \frac{2a_{k+1}}{a_k + a_{k+1}} \right)^2 \sum_{j=1}^n L_j D_{f_j}(x, x^*) \\
&\quad + n^2 \max_j \{p_j^2\} \left( \sup_{k \in \mathbb{Z}} \frac{2a_{k+1}}{a_k + a_{k+1}} \right)^2 \|\nabla f(x)\|^2 \\
&\leq 2n \max_j \{L_j\} \max_j \{p_j(1-p_j)\} \left( \sup_{k \in \mathbb{Z}} \frac{2a_{k+1}}{a_k + a_{k+1}} \right)^2 \cdot D_f(x, x^*) \\
&\quad + 2n \max_j \{L_j\} \max_j \{p_j(1-p_j)\} \left( \sup_{k \in \mathbb{Z}} \frac{2a_{k+1}}{a_k + a_{k+1}} \right)^2 \Delta^* \\
&\quad + n^2 \max_j \{p_j^2\} \left( \sup_{k \in \mathbb{Z}} \frac{2a_{k+1}}{a_k + a_{k+1}} \right)^2 \|\nabla f(x)\|^2.
\end{aligned}$$

For the second term in (61), we have

$$\begin{aligned}
\mathbb{E} \left[ \left\| \sum_{j=1}^n (1 - \mathbb{I}_j) \nabla f_j(x) \right\|^2 \right] &= \sum_{j=1}^n \mathbb{E} \left[ (1 - \mathbb{I}_j)^2 \right] \|\nabla f_j(x)\|^2 \\
&\quad + 2 \sum_{j \neq h} \mathbb{E}[(1 - \mathbb{I}_j)] \mathbb{E}[(1 - \mathbb{I}_h)] \langle \nabla f_j(x), \nabla f_h(x) \rangle \\
&= \sum_{j=1}^n (1 - p_j) \|\nabla f_j(x)\|^2 \\
&\quad + 2 \sum_{j \neq h} (1 - p_j)(1 - p_h) \langle \nabla f_j(x), \nabla f_h(x) \rangle \\
&= \sum_{j=1}^n (1 - p_j) p_j \|\nabla f_j(x)\|^2 + \left\| \sum_{j=1}^n (1 - p_j) \nabla f_j(x) \right\|^2 \\
&\leq \max_j \{p_j(1 - p_j)\} \sum_{j=1}^n \|\nabla f_j(x)\|^2 \\
&\quad + n^2 \max_j \{(1 - p_j)^2\} \|\nabla f(x)\|^2.
\end{aligned}$$

Further, due to  $L_j$ -smoothness of  $f_j$ ,  $j \in [n]$ , and due to Lemma 1, we obtain

$$\begin{aligned}
\mathbb{E} \left[ \left\| \sum_{j=1}^n (1 - \mathbb{I}_j) \nabla f_j(x) \right\|^2 \right] &\leq 2 \max_j \{p_j(1 - p_j)\} \sum_{j=1}^n L_j D_{f_j}(x, x^*) \\
&\quad + n^2 \max_j \{(1 - p_j)^2\} \|\nabla f(x)\|^2 \\
&\leq 2n \max_j \{p_j(1 - p_j)\} \max_j \{L_j\} D_f(x, x^*) \\
&\quad + 2n \max_j \{p_j(1 - p_j)\} \max_j \{L_j\} \Delta^* \\
&\quad + n^2 \max_j \{(1 - p_j)^2\} \|\nabla f(x)\|^2
\end{aligned}$$

Therefore, from (61), we have

$$\begin{aligned}
\mathbb{E} \left[ \|g(x)\|^2 \right] &\leq \frac{4}{n} \max_j \{L_j\} \max_j \{p_j(1 - p_j)\} \left( \left( \sup_{k \in \mathbb{Z}} \frac{2a_{k+1}}{a_k + a_{k+1}} \right)^2 + 1 \right) D_f(x, x^*) \\
&\quad + 2 \max_j \{p_j^2\} \left( \left( \sup_{k \in \mathbb{Z}} \frac{2a_{k+1}}{a_k + a_{k+1}} \right)^2 + 1 \right) \|\nabla f(x)\|^2 \\
&\quad + \frac{4}{n} \max_j \{L_j\} \max_j \{p_j(1 - p_j)\} \left( \left( \sup_{k \in \mathbb{Z}} \frac{2a_{k+1}}{a_k + a_{k+1}} \right)^2 + 1 \right) \Delta^*.
\end{aligned}$$

■

## J Known estimators in biased ABC framework: proofs for Section C

### J.1 Proof of Claim 5

Observe that

$$\frac{(\nabla f(x))_{(d-k+1)}^2 + \dots + (\nabla f(x))_{(d)}^2}{k} \geq \frac{(\nabla f(x))_1^2 + \dots + (\nabla f(x))_d^2}{d},$$

and

$$\langle g(x), \nabla f(x) \rangle = \|g(x)\|^2 = (\nabla f(x))_{(d-k+1)}^2 + \dots + (\nabla f(x))_{(d)}^2.$$

Therefore,

$$\langle g(x), \nabla f(x) \rangle \geq \frac{k}{d} \|\nabla f(x)\|^2,$$

and  $b$  can be set to  $\frac{k}{d}$ ,  $c$  can be set to 0.

Clearly,  $\|g(x)\|^2 \leq \|\nabla f(x)\|^2$  which implies that  $A = C = 0$ ,  $B = 1$ . ■

## J.2 Proof of Claim 6

Observe that

$$\langle \mathbb{E}[g(x)], \nabla f(x) \rangle = \|\nabla f(x)\|^2.$$

This implies that  $b = 1$ ,  $c = 0$ . Also, notice that

$$\mathbb{E}[\|g(x)\|^2] = \left(\frac{d}{k}\right)^2 \mathbb{E}\left[\sum_{i \in S} (\nabla f(x))_i^2 e_i\right] = \frac{d}{k} \|\nabla f(x)\|^2.$$

Therefore,  $A = C = 0$ ,  $B = \frac{d}{k}$ . ■

## J.3 Proof of Claim 7

Observe that

$$\langle \mathbb{E}[g(x)], \nabla f(x) \rangle = \frac{k}{d} \|\nabla f(x)\|^2.$$

This implies that  $b = \frac{k}{d}$ ,  $c = 0$ . Also, notice that

$$\mathbb{E}[\|g(x)\|^2] = \mathbb{E}\left[\sum_{i \in S} (\nabla f(x))_i^2 e_i\right] = \frac{k}{d} \|\nabla f(x)\|^2.$$

Therefore,  $A = C = 0$ ,  $B = \frac{k}{d}$ . ■

## J.4 Proof of Claim 8

Lemma 6 of [Beznosikov et al., 2020] states that adaptive random sparsification operator belongs to  $\mathbb{B}^1(\frac{1}{d}, 1)$ ,  $\mathbb{B}^2(\frac{1}{d}, 1)$ ,  $\mathbb{B}^3(d)$ . It follows that  $A = 0$ ,  $B = 1$ ,  $C = 0$  (see (5)) and  $b = \frac{1}{d}$ ,  $c = 0$ . ■

## J.5 Proof of Claim 9

**Definition 19** Let  $\omega \geq 1$ . An estimator  $g(x)$  belongs to a set  $\mathbb{U}(\omega)$ , if  $g(x)$  is unbiased ( $\mathbb{E}[g(x)] = \nabla f(x)$ ), for all  $x \in \mathbb{R}^d$ , and if its second moment is bounded as

$$\mathbb{E}[\|g(x)\|^2] \leq \omega \|\nabla f(x)\|^2, \quad \forall x \in \mathbb{R}^d. \quad (62)$$

Lemma 8 of [Beznosikov et al., 2020] states that general unbiased rounding operator belongs to  $\mathbb{U}(\omega)$  with

$$\omega = \frac{Z}{4} = \frac{1}{4} \sup_{k \in \mathbb{Z}} \left( \frac{a_k}{a_{k+1}} + \frac{a_{k+1}}{a_k} + 2 \right),$$

where  $Z$  is defined in (32).

Since  $g(x)$  is unbiased, we have  $b = 1$ ,  $c = 0$ . From (62) we have that  $A = C = 0$ ,  $B = \frac{Z}{4}$ . ■

### J.6 Proof of Claim 10

Lemma 9 of [Beznosikov et al., 2020] states that general biased rounding operator belongs to  $\mathbb{B}^1(\alpha, \beta)$ ,  $\mathbb{B}^2(\gamma, \beta)$ , and  $\mathbb{B}^3(\delta)$ , where

$$\beta = F, \quad \gamma = G, \quad \alpha = \gamma^2, \quad \delta = \sup_{k \in \mathbb{Z}} \frac{(a_k + a_{k+1})^2}{4a_k a_{k+1}}.$$

Therefore,

$$A = C = c = 0, \quad B = F^2, \quad b = \frac{G^2}{F}.$$

with  $F$  and  $G$  defined in (33). ■

### J.7 Proof of Claim 11

Since natural compression estimator is a special case of general unbiased rounding estimator with  $a_k = 2^k$ , we obtain that  $g(x)$  belongs to a set  $\mathbb{U}(\frac{9}{8})$ , and, in a similar way as in the proof of Claim 9, we obtain that  $A = C = c = 0$ ,  $B = \frac{9}{8}$ ,  $b = 1$ . ■

### J.8 Proof of Claim 12

Lemma 10 of [Beznosikov et al., 2020] states that exponential dithering operator belongs to  $\mathbb{U}(H_a)$ . Since  $g(x)$  is unbiased, we have that  $b = 1$ ,  $c = 0$ . From (62) we have that  $A = C = 0$ ,  $B = H_a$ . ■

### J.9 Proof of Claim 13

Natural dithering estimator is a special case of exponential dithering operator in case when  $a = 2$ . Therefore, Claim 13 is a direct consequence of Claim 12, and we have  $A = C = c = 0$ ,  $B = H_2$ ,  $b = 1$ . ■

### J.10 Proof of Claim 14

Lemma 11 of [Beznosikov et al., 2020] states that the composition operator of Top- $k$  sparsification and exponential dithering with base  $a$  belongs to  $\mathbb{B}^1(\frac{k}{d}, H_a)$ ,  $\mathbb{B}^2(\frac{k}{d}, H_a)$ ,  $\mathbb{B}^3(\frac{d}{k} H_a)$ , where  $H_a$  is a constant defined in (34).

Therefore, from (5), we have

$$A = 0, \quad B = H_a^2, \quad C = 0, \quad b = \frac{k}{dH_a}, \quad c = 0. ■$$

### J.11 Proof of Claim 15

When  $f$  is convex and satisfies Assumption 0 with a constant  $L$ , Nesterov and Spokoiny [2017] (Lemma 3 and Theorem 4) bound the bias in the following way:

$$\|\mathbb{E}[g_{GS}(x)] - \nabla f(x)\|^2 \leq \frac{\tau^2}{4} L^2 (d+3)^3.$$

Therefore, due to (46) and (47), we obtain that

$$\langle \nabla f(x), \mathbb{E}[g(x)] \rangle \geq \frac{1}{2} \|\nabla f(x)\|^2 - \frac{\tau^2}{8} L^2 (d+3)^3.$$

Further, from Theorem 4 of [Nesterov and Spokoiny, 2017], we have that

$$\mathbb{E} \left[ \|g_{GS}(x)\|^2 \right] \leq 2(d+4) \|\nabla f(x)\|^2 + \frac{\tau^2}{2} L^2 (d+6)^3.$$

We can choose

$$A = A_{GS} \stackrel{\text{def}}{=} 0, \quad B = B_{GS} \stackrel{\text{def}}{=} 2(d+4), \quad C = C_{GS} \stackrel{\text{def}}{=} \frac{\tau^2}{2} L^2 (d+6)^3, \\ b = b_{GS} = \frac{1}{2}, \quad c = c_{GS} \stackrel{\text{def}}{=} \frac{\tau^2}{8} L^2 (d+3)^3.$$

■

### J.12 Proof of Claim 16

It is easy to see that it satisfies Assumption 7 with  $\Delta = w\sqrt{d}$ . Then, it follows that  $\|\mathbb{E}[g(x)] - \nabla f(x)\|^2 \leq w^2 d$ . Therefore,  $\langle \mathbb{E}[g(x)], \nabla f(x) \rangle \geq \|\nabla f(x)\|^2 - w^2 d + \|\mathbb{E}[g(x)]\|^2 \geq \|\nabla f(x)\|^2 - w^2 d$ . We can choose  $b = 1, c = w^2 d$ .

Further,  $\mathbb{E} \left[ \|g(x)\|^2 \right] = \|g(x)\|^2 \leq \|\nabla f(x)\|^2$ . It means that we can choose  $A = C = 0, B = 1$ .

■

### J.13 Proof of Claim 17

Observe, that  $g(x)$  satisfies Assumption 7 with  $\Delta = \frac{\sqrt{d}}{\chi}$ . Indeed, for every  $j \in [d]$ , we have

$$\frac{1}{n} \sum_{i=1}^n (\nabla f_i(x))_j - \frac{1}{\chi} \leq \frac{1}{n} \sum_{i=1}^n \frac{1}{\chi} (R(\chi \nabla f_i(x)))_j \leq \frac{1}{n} \sum_{i=1}^n (\nabla f_i(x))_j + \frac{1}{\chi}.$$

Therefore,  $\|g(x) - \nabla f(x)\|^2 \leq \frac{d}{\chi^2}$ . In accordance with Theorem 13 - vii, we obtain that we can choose  $A = 0, B = 2, C = \frac{2d}{\chi^2}, b = \frac{1}{2}, c = \frac{d}{2\chi^2}$ .

■

### J.14 Proof of Claim 18

In accordance with Khirirat et al. [2018b, Lemma 2],  $g(x)$  satisfies Assumption 5 with  $\rho = 1, \zeta = d$ . It follows from Theorem 13 that  $g(x)$  satisfies *BiasedABC* with  $A = 0, B = d, C = 0, b = 1$  and  $c = 0$ .

■

### J.15 Proof of Claim 19

In accordance with Karimireddy et al. [2019, Lemma 8]  $g(x)$  satisfies Assumption 3 with  $\delta(x) = \frac{d\|x\|_2^2}{\|x\|_1^2} \leq d$ . It follows from Theorem 13 that  $g(x)$  satisfies *BiasedABC* with  $A = 0, B = 2(2 - \frac{1}{d}), C = 0, b = \frac{1}{2d}$  and  $c = 0$ .

■

### J.16 Proof of Claim 20

Observe that

$$\|\mathbb{E}[g(x)] - \nabla f(x)\|^2 \leq \max_j \{\lambda_j\} \cdot c^2 h^2 + \left(1 - \min_j \{\lambda_j\}\right) \|\nabla f(x)\|^2 \\ - \left\| \text{Diag} \left( \sqrt{\lambda_1(1-\lambda_1)}, \dots, \sqrt{\lambda_d(1-\lambda_d)} \right) \cdot G_h(x) \right\|^2.$$

Therefore, we obtain that

$$\begin{aligned}
\langle \mathbb{E}[g(x)], \nabla f(x) \rangle &\geq \frac{1}{2} \left( -\max_j \{\lambda_j\} \cdot c^2 h^2 + \min_j \{\lambda_j\} \cdot \|\nabla f(x)\|^2 \right) \\
&\quad + \frac{1}{2} \left( \|\mathbb{E}[g(x)]\|^2 + \left\| \text{Diag} \left( \sqrt{\lambda_1(1-\lambda_1)}, \dots, \sqrt{\lambda_d(1-\lambda_d)} \right) \cdot G_h(x) \right\|^2 \right) \\
&= \frac{1}{2} \left( -\max_j \{\lambda_j\} \cdot c^2 h^2 + \min_j \{\lambda_j\} \cdot \|\nabla f(x)\|^2 \right) \\
&\quad + \frac{1}{2} \left\| \text{Diag} \left( \sqrt{\lambda_1}, \dots, \sqrt{\lambda_d} \right) \cdot G_h(x) \right\|^2 \\
&\geq \frac{1}{2} \left( -\max_j \{\lambda_j\} \cdot c^2 h^2 + \min_j \{\lambda_j\} \cdot \|\nabla f(x)\|^2 \right).
\end{aligned}$$

Further, it is easy to see that

$$\mathbb{E} \left[ \|g(x)\|^2 \right] \leq \max_j \{\lambda_j\} \cdot \mathbb{E} \left[ \|G_h(x)\|^2 \right] \leq 2\tilde{A} \max_j \{\lambda_j\} (f(x) - f^*) + \tilde{C} \max_j \{\lambda_j\}.$$

■

## K Proofs of the results presented in Table 3

We proved in Claim 3 that Biased independent sampling estimator (see Def. 1) satisfies Biased ABC assumption. On the other hand, in Theorem 2 (parts viii and ix) we show that it Assumptions 6 and 8 do not hold for it. Therefore, it does not satisfy Assumptions 1 – 8 (see Figure 1).

We proved in Claim 4 that Distributed general biased rounding estimator (see Def. 2) satisfies Biased ABC assumption. As for Biased independent sampling estimator (see Def. 1), it is straightforward to show that Distributed general biased rounding estimator does not satisfy Assumptions 6 and 8. Therefore, Assumptions 1 – 8 (see Figure 1) do not hold for it.

In [Beznosikov et al., 2020, Lemma 7] it is proven that Top- $k$  (see Def. 3) estimator satisfies Assumption 3. Therefore, in accordance with Figure 1, we only need to verify that Assumption 5 holds, and Assumption 7 does not hold for Top- $k$ . The argument in the proof of Claim 5 shows that Assumption 5 is satisfied for  $g(x)$ . Consider  $f(x) = \frac{x_1^2}{2} + \frac{x_2^2}{2}$ ,  $x \in \mathbb{R}^2$ , and Top-1 estimator. For every  $x_2$  in  $\mathbb{R}$ , consider  $x = (x_1, x_2) \in \mathbb{R}^2$ , such that  $x_1 \geq x_2$ . Clearly,  $g(x) = (x_1, 0)$ ,  $\nabla f(x) = (x_1, x_2)$ . Then,  $\|g(x) - \nabla f(x)\|^2 = x_2^2$ . For any  $\Delta \geq 0$ , there exists  $x_2$  such that  $x_2^2 \geq \Delta^2$ . Therefore, Assumption 7 does not hold for  $g(x)$ .

Rand- $k$  (see Def. 4) is a stochastic estimator, it does not satisfy Assumption 5. Since  $\|\mathbb{E}[g(x)] - \nabla f(x)\|^2 = 0$ ,  $\mathbb{E} \left[ \|g(x) - \mathbb{E}[g(x)]\|^2 \right] = \left( \frac{d}{k} - 1 \right) \|\nabla f(x)\|^2$ , it satisfies Assumption 4. It remains to show that it does not satisfy Assumptions 3 and 7. Consider  $f(x) = \frac{x_1^2}{2} + \frac{x_2^2}{2}$ ,  $x \in \mathbb{R}^2$ , and Rand-1 estimator. For every  $x_2$  in  $\mathbb{R}$ , consider  $x = (x_1, x_2) \in \mathbb{R}^2$ , such that  $x_1 \geq x_2$ . Clearly,  $\mathbb{E} \left[ \|g(x) - \nabla f(x)\|^2 \right] = \|\nabla f(x)\|^2 = x_1^2 + x_2^2$ , and this expression can not be bounded by any constant  $\Delta^2 \geq 0$ , which implies that Assumption 7 does not hold. Also, there is no  $\delta > 0$ , such that  $\|\nabla f(x)\| \leq \left(1 - \frac{1}{\delta}\right) \|\nabla f(x)\|^2$ , for all  $x \in \mathbb{R}^2$ , which implies that Assumption 3 does not hold.

In [Beznosikov et al., 2020, Lemma 5] it is proven that Biased Rand- $k$  estimator (see Def. 5) satisfies Assumption 3. Therefore, in accordance with Figure 1, we only need to verify that Assumptions 5 and 7 do not hold for Biased Rand- $k$ . Since this estimator is stochastic, Assumption 5 does not hold. Consider  $f(x) = \frac{x_1^2}{2} + \frac{x_2^2}{2}$ ,  $x = (x_1, x_2) \in \mathbb{R}^2$ , and Biased Rand-1 estimator. We have that  $\mathbb{E} \left[ \|g(x) - \nabla f(x)\|^2 \right] = \frac{1}{2} \|\nabla f(x)\|^2 = \frac{x_1^2}{2} + \frac{x_2^2}{2}$ , and this expression can not be bounded by any constant  $\Delta^2 \geq 0$ . Therefore, Assumption 7 is not satisfied.

In [Beznosikov et al., 2020, Lemma 6] it is proven that Adaptive random sparsification (see Def. 6) satisfies Assumption 3. Therefore, in accordance with Figure 1, we only need to verify that Assumptions 5 and 7 do not hold for Adaptive random sparsification estimator. Since it is stochastic,

Assumption 5 does not hold. Consider  $f(x) = \frac{x_1^2}{2} + \frac{x_2^2}{2}$ ,  $x = (x_1, x_2) \in \mathbb{R}^2$ , and Adaptive random sparsification estimator. Observe that

$$\begin{aligned}\mathbb{E} \left[ \|g(x) - \nabla f(x)\|^2 \right] &= \|\nabla f(x)\|_2^2 \left( 1 - \frac{\|\nabla f(x)\|_3^3}{\|\nabla f(x)\|_1 \|\nabla f(x)\|_2^2} \right) \\ &= (x_1^2 + x_2^2) \left( 1 - \frac{x_1^3 + x_2^3}{(|x_1| + |x_2|)(x_1^2 + x_2^2)} \right).\end{aligned}$$

Let  $\lambda > 0$  be some constant. Consider  $x \in \mathbb{R}^2$  such that  $|x_1| = \lambda|x_2|$ . Then

$$\mathbb{E} \left[ \|g(x) - \nabla f(x)\|^2 \right] = \lambda x_2^2,$$

and, for any  $\Delta^2 \geq 0$ , there exists  $x_2 \in \mathbb{R}$ , such that  $\lambda x_2^2 \geq \Delta^2$ . Therefore, Assumption 7 does not hold.

General unbiased rounding (see Def. 7) belongs to  $\mathbb{U}(\frac{Z}{4})$  (see Claim 9) with  $Z$  defined in (32). Then,  $\mathbb{E} \left[ \|g(x) - \nabla f(x)\|^2 \right] \leq (\frac{Z}{4} - 1) \|\nabla f(x)\|^2$ , and  $g(x)$  satisfies Assumption 4. Therefore, in accordance with Figure 1, we only need to verify that Assumptions 3, 5 and 7 do not hold. Let  $a_k = 6^k$ ,  $k \in \mathbb{Z}$ . Consider  $f(x) = \frac{x^2}{2}$ ,  $x \in \mathbb{R}$ , and General unbiased rounding estimator. Then,

$$\begin{aligned}\mathbb{E} \left[ \|g(x) - \nabla f(x)\|^2 \right] &= \mathbb{E} \left[ \|g(x)\|^2 \right] - \|\nabla f(x)\|^2 \\ &= -6^{2k+1} + 7 \cdot 6^k \cdot x - x^2.\end{aligned}$$

Let  $x = \frac{7}{4} \cdot 6^k$ . Then  $\mathbb{E} \left[ \|g(x) - \nabla f(x)\|^2 \right] \geq x^2$ :

$$\frac{\mathbb{E} \left[ \|g(x) - \nabla f(x)\|^2 \right]}{x^2} = \frac{51}{49} > 1.$$

Then, Assumption 3 does not hold. Note that, for every constant  $\Delta^2 \geq 0$ , there exists  $k \in \mathbb{Z}$ , such that  $x^2 > \Delta^2$ . Therefore, Assumption 7 is not satisfied. Since this estimator is stochastic, Assumption 5 does not hold as well.

In [Beznosikov et al., 2020, Lemma 9] it is proven that General biased rounding estimator (see Def. 8) satisfies Assumption 3. Therefore, it remains to prove that Assumption 5 holds and Assumption 7 does not hold. It follows from the proof of Claim 10 that General biased rounding estimator satisfies Assumption 5. Observe that it is deterministic, which implies that

$$\mathbb{E} \left[ \|g(x) - \nabla f(x)\|^2 \right] = \|g(x) - \nabla f(x)\|^2.$$

Let  $f(x) = \frac{x^2}{2}$ ,  $a_k = 2^{2k+1}$ . For a sequence of iterations  $\{x_k\} = 2^{2k} + 0.1$ ,  $k \in \mathbb{N}$ , we have  $\|g(x) - \nabla f(x)\|^2 = 2^{2k} - 0.1$ , and there is no constant  $\Delta^2 \geq 0$ , such that  $2^{2k} - 0.1 \leq \Delta^2$ , for every  $k \in \mathbb{N}$ .

Natural compression (see Def. 9) belongs to  $\mathbb{U}(\frac{9}{8})$  (see Claim 9). Then,  $\mathbb{E} \left[ \|g(x) - \nabla f(x)\|^2 \right] \leq \frac{1}{8} \|\nabla f(x)\|^2$ , and  $g(x)$  satisfies Assumption 3. Therefore, in accordance with Figure 1, we only need to verify that Assumptions 5 and 7 do not hold. Since  $g(x)$  is a stochastic estimator, Assumption 5 is not satisfied. Consider  $f(x) = \frac{x^2}{2}$ ,  $x \in \mathbb{R}$ , and Natural compression estimator. Then

$$\begin{aligned}\mathbb{E} \left[ \|g(x) - \nabla f(x)\|^2 \right] &= \mathbb{E} \left[ \|g(x)\|^2 \right] - \|\nabla f(x)\|^2 \\ &= -2^{2k+1} + 3 \cdot 2^k \cdot x - x^2.\end{aligned}$$

Let  $x = \frac{3}{2} \cdot 2^k$ . Then  $\mathbb{E} \left[ \|g(x) - \nabla f(x)\|^2 \right] = 2^{2k-2}$ . For every constant  $\Delta^2 \geq 0$ , there exists  $k \in \mathbb{Z}$ , such that  $2^{2k-2} > \Delta^2$ . Therefore, Assumption 7 does not hold.

It is shown in [Beznosikov et al., 2020, Lemma 11] that General exponential dithering estimator (see Def. 10) satisfies Assumption 3. Therefore, it remains to show that Assumptions 5 and 7 do

not hold. Since this estimator is stochastic, Assumptions 5 is not satisfied. Further, let  $f(x) = \frac{x_1^2 + x_2^2}{2}$ ,  $p = 2$ ,  $x_1 = 3k$ ,  $x_2 = 4k$ ,  $k \in \mathbb{Z}$ ,  $s = 1$ ,  $a = 2$ . Then,  $\mathbb{E}[g(x)] = (2k, k)$ . Therefore,  $\mathbb{E}[\|g(x) - \nabla f(x)\|^2] = 15k^2 - 5k^2 + 10k^2 = 20k^2$ , and there is no  $\delta > 0$ , such that  $20k^2 \leq (1 - \frac{1}{\delta}) 15k^2$ .

Since Natural dithering (see Def. 11) is a special case of General exponential dithering, and we established all of the inclusions for it regardless of the value of  $a$ , the same Assumptions hold or do not hold for this estimator.

It is proven in [Beznosikov et al., 2020, Lemma 11] that Composition of Top- $k$  and exponential dithering satisfies Assumption 3. Since this estimator is stochastic, it does not satisfy Assumption 5. Suppose  $f(x) = \frac{x^2}{2}$ ,  $d = 1$ , and the estimator is composed of Top-1 and exponential dithering with base  $a = 2$  and  $s = 1$ . Since  $d = 1$ ,  $k = 1$ , the problem and the estimator is exactly the same as in the previous case, where we showed that General exponential dithering estimator does not satisfy Assumption 7.

Let us show that Gaussian smoothing (see Def. 13) does not satisfy Assumptions 8. Suppose  $f(x) = x$ ,  $x \in \mathbb{R}$ ,  $d = 1$ . Then  $g_{GS}(x) = z^2$ ,  $z \sim \mathcal{N}(0, 1)$ , and we have  $\langle \mathbb{E}[g_{GS}(x)], \nabla f(x) \rangle = 1$ , which means that Assumption 8 does not hold. Let us show that Assumption 7 is not satisfied as well. Consider  $f(x) = \frac{x^2}{2}$ ,  $x \in \mathbb{R}$ ,  $d = 1$ . Then,  $g_{GS}(x) = \frac{2xz^2 + \tau z^3}{2}$ . Observe that  $\mathbb{E}[g_{GS}(x)] = x$ . We have that

$$\begin{aligned} \mathbb{E}[\|g_{GS}(x) - \nabla f(x)\|^2] &= \mathbb{E}[\|g_{GS}(x)\|^2] - x^2 \\ &= \mathbb{E}\left[x^2 z^4 + \frac{\tau^2 z^6}{4} + x\tau z^5\right] - x^2 \\ &= 2x^2 + \frac{15}{4}\tau^2, \end{aligned}$$

and it can not be bounded by  $\Delta^2 \geq 0$ .

In Claim 16 we show that hard-threshold sparsifier (see Def. 14) satisfies Assumption 7. It is easy to see that it satisfies Assumption 4. If we consider  $f(x) = \frac{x^2}{2}$ , and, for all  $t \in \mathbb{N}$ ,  $|x_t| < \omega$ , then  $\mathbb{E}[\|g(x) - \nabla f(x)\|^2] = \|\nabla f(x)\|^2$ , and Assumption 3 is not satisfied. Further, let us show that this estimator does not satisfy Assumption 5. Consider  $f(x) = \frac{x^2}{2}$ , and  $x \in \mathbb{R}^d$ ,  $d > 1$ , such that, for  $\ell = \lfloor d/2 \rfloor$ ,  $x_1 = \dots = x_\ell = \frac{\omega}{2}$ , and  $x_{\ell+1} = \dots = x_d = \omega$ . Then,

$$\langle \mathbb{E}[g(x)], \nabla f(x) \rangle = \|x\|^2 - \omega(d - \lfloor d/2 \rfloor + 1),$$

and Assumption 5 does not hold.

In Claim 17 we prove that Scaled integer rounding (see Def. 15) satisfies Assumption 7. Also, it is easy to see that  $\|g(x) - \nabla f(x)\|^2 \leq \|\nabla f(x)\|^2$ , and equality holds for  $f(x) = \frac{x^2}{2}$ ,  $n = d = 1$ ,  $x = 0.25$ . Therefore,  $g(x)$  does not satisfy Assumption 3, and satisfies Assumption 4. Since rounding preserves the sign (or rounds a number to 0), we have that  $\langle \nabla f(x), \frac{1}{\chi} R(\chi \nabla f(x))_i \rangle \geq 0$ . Also,  $\|g(x)\|^2 \leq 4 \|\nabla f(x)\|^2$ . This means,  $g(x)$  satisfies Assumption 5. There is a misprint in Table 3, refer to Table 9.

It is proven in Claim 18 that Biased dithering estimator (see Def. 16) satisfies Assumption 5. Further, let  $f(x) = \frac{x_1^2}{2} + \dots + \frac{x_9^2}{2}$ ,  $d = 9$ ,  $k \in \mathbb{N}$ ,  $x_1 = \dots = x_9 = k$ . Then we have

$$\begin{aligned} \mathbb{E}[\|g(x) - \nabla f(x)\|^2] &= \|\mathbb{E}[g(x)] - \nabla f(x)\|^2 \\ &= \|(\text{sign}(x_1)(|x_1| - \|\nabla f(x)\|), \dots, \text{sign}(x_9)(|x_9| - \|\nabla f(x)\|))\|^2 \\ &= \|\nabla f(x)\|^2 (\sqrt{9} - 1)^2 \\ &= 4 \|\nabla f(x)\|^2, \end{aligned}$$

which means that Assumption 6 is not satisfied.

In Claim 19 we prove that Sign compression estimator (see Def. 17) satisfies Assumption 3. Therefore, in accordance with Figure 1, we only need to deal with Assumptions 5 and 7. Since this estimator is deterministic, it follows from Claim 19 that Assumption 5 holds for it. Suppose  $f(x) = \frac{x_1^2}{2} + \frac{x_2^2}{2}$ ,  $d = 2$ . Then

$$\begin{aligned}\mathbb{E} [\|g(x) - \nabla f(x)\|^2] &= \|\mathbb{E}[g(x)] - \nabla f(x)\|^2 \\ &= \left\| \left( \text{sign}(x_1) \frac{|x_1|}{2}, \text{sign}(x_2) \frac{|x_2|}{2} \right) - (x_1, x_2) \right\|^2 \\ &= \frac{x_1^2}{4} + \frac{x_2^2}{4} \\ &= \frac{1}{4} \|\nabla f(x)\|^2.\end{aligned}$$

It follows that Assumption 7 does not hold.

## L Relation between assumption 3 and contractive compression

In Assumption 3, one can observe a resemblance to the contractive compression property, as shown in the following equation:

$$\mathbb{E} [\|\mathcal{C}(x) - x\|^2] \leq \left(1 - \frac{1}{\delta}\right) \|x\|^2 \quad \forall x \in \mathbb{R}^d. \quad (63)$$

The contractive compression property is commonly utilized in methods dealing with biased compression (e.g., TopK), as demonstrated in various studies [Stich et al., 2018; Karimireddy et al., 2019; Stich and Karimireddy, 2020; Beznosikov et al., 2020; Gorbunov et al., 2020; Cordonnier, 2018; Richtárik et al., 2021; Fatkhullin et al., 2021; Richtárik et al., 2022]. However, equations (6) and (63) are not generally equivalent since in practise one may not aim to compress exactly a gradient itself.

## M Relation between Assumption 7 and absolute compression

Within Assumption 7, a similarity to the absolute compression property

$$\mathbb{E} [\|\mathcal{C}(x) - x\|^2] \leq \Delta^2 \quad \forall x \in \mathbb{R}^d \quad (64)$$

can be discerned. Nonetheless, it should be noted that the expressions in equations (14) and (64) do not typically exhibit equivalence.

Various instances of absolute compression have been extensively employed by practitioners over the years [Tang et al., 2020; Sahu et al., 2021; Danilova and Gorbunov, 2022]. A prominent example is the hard-threshold sparsifier  $\mathcal{C}_{\text{HT}}(x)$  [Sahu et al., 2021; Dutta et al., 2020; Ström, 2015]. It can be demonstrated that  $\mathcal{C}_{\text{HT}}(x)$  adheres to Eq. (14) with  $\Delta = \lambda\sqrt{d}$ . Additional examples encompass (stochastic) rounding schemes with limited error [Gupta et al., 2015; Khirirat et al., 2020] and integer rounding [Sapio et al., 2021; Mishchenko et al., 2021].

The absolute compression assumption has also been featured in several studies [Sahu et al., 2021; Danilova and Gorbunov, 2022; Khirirat et al., 2020, 2022; Chen et al., 2021a], which examine the Error Feedback mechanism [Stich et al., 2018; Karimireddy et al., 2019; Stich and Karimireddy, 2020].

Specifically, Sahu et al. [2021] established that hard-threshold sparsifiers are optimal for minimizing total error (a unique quantity that emerges in the analysis of EC-SGD) with respect to any fixed sequence of errors.

Furthermore, the authors of [Sahu et al., 2021] elucidate both the theoretical and practical advantages of absolute compressors in comparison to  $\delta$ -contractive ones expressed in Equation (63).

## N Relations between the estimators from Assumptions 1–3

Below we restate Theorem 2 from [Beznosikov et al., 2020] about the relations between these sets in terms of biased gradient estimators instead of biased compressors.

**Theorem 14 (Relations between the estimators from Assumptions 1–3)** *Let  $\lambda > 0$  be a scaling parameter.*

1. *If  $g \in \mathbb{B}^1(\alpha, \beta)$ , then*
  - $\beta^2 \geq \alpha$  and  $\lambda g \in \mathbb{B}^1(\lambda^2 \alpha, \lambda \beta)$ ,
  - $g \in \mathbb{B}^2(\alpha, \beta^2)$  and  $\frac{1}{\beta} g \in \mathbb{B}^3\left(\frac{\beta^2}{\alpha}\right)$ .
2. *If  $g \in \mathbb{B}^2(\tau, \beta)$ , then*
  - $\beta \geq \tau$  and  $\lambda g \in \mathbb{B}^2(\lambda \tau, \lambda \beta)$ ,
  - $g \in \mathbb{B}^1(\tau^2, \beta)$  and  $\frac{1}{\beta} g \in \mathbb{B}^3\left(\frac{\beta}{\tau}\right)$
3. *If  $g \in \mathbb{B}^3(\delta)$ , then*
  - $\delta \geq 1$ ,
  - $g \in \mathbb{B}^2\left(\frac{1}{2\delta}, 2\right) \subseteq \mathbb{B}^1\left(\frac{1}{4\delta^2}, 2\right)$ .

We do not prove it here and refer the reader to the original paper.

## O Equivalence of Assumption 6 and [Ajalloeian and Stich, 2020, Def. 1]

Definition 1 in [Ajalloeian and Stich, 2020] is written in the following way.

**Definition 20** *Let  $(\mathcal{D}, \mathcal{F})$  be a measurable space and  $Y$  be a random element of this space. Let gradient estimator  $g(x, Y)$  have a form*

$$g(x, Y) = \nabla f(x) + b(x) + \mathcal{Z}(x, Y),$$

where  $b(x) : \mathbb{R}^d \rightarrow \mathbb{R}^d$  is a bias and  $\mathcal{N} : \mathbb{R}^d \times \mathcal{D} \rightarrow \mathbb{R}^d$  is a zero-mean noise, i.e.  $\mathbb{E}[\mathcal{Z}(x, Y)|Y] = 0$ , for all  $x \in \mathbb{R}^d$ .

There exist constants  $M, \sigma^2 \geq 0$  such that

$$\mathbb{E}[\|\mathcal{Z}(x, Y)\|^2] \leq M \|\nabla f(x) + b(x)\|^2 + \sigma^2, \quad \forall x \in \mathbb{R}^d. \quad (65)$$

There exist constants  $0 \leq m < 1$  and  $\varphi^2 \geq 0$ , such that

$$\|b(x)\|^2 \leq m \|\nabla f(x)\|^2 + \varphi^2, \quad \forall x \in \mathbb{R}^d. \quad (66)$$

For the purpose of clarity, we rewrote the inequalities (65) and (66) in the notation adopted in our paper (see Section 4). Below we establish their equivalence.

**Claim 21** *Definition 20 is equivalent to Assumption 6.*

**Proof of Claim 21.** Observe that  $\mathcal{Z}(x, Y) = g(x, Y) - \mathbb{E}[g(x, Y)]$ ,  $\nabla f(x) + b(x) = \mathbb{E}[g(x, Y)]$ ,  $b(x) = \mathbb{E}[g(x, Y)] - \nabla f(x)$ . It remains to perform these substitutions in (65) and (66).

## P Proof of Lemma 1

Let  $x_+ = x - \frac{1}{L} \nabla f(x)$ , then using the  $L$ -smoothness of  $f$  we obtain

$$f(x_+) \leq f(x) + \langle \nabla f(x), x_+ - x \rangle + \frac{L}{2} \|x_+ - x\|^2.$$

Since  $f^* \leq f(x_+)$  and the definition of  $x_+$  we have,

$$f^* \leq f(x_+) \leq f(x) - \frac{1}{L} \|\nabla f(x)\|^2 + \frac{1}{2L} \|\nabla f(x)\|^2 = f(x) - \frac{1}{2L} \|\nabla f(x)\|^2.$$

It remains to rearrange the terms to get the claimed result. ■

## Q Young's inequality

Throughout the paper we use the following version of a well-known inequality:

**Lemma 3 (Young's Inequality)** *For every  $s > 0$ , for any vectors  $u, h \in \mathbb{R}^d$ , we have*

$$\|u \pm h\|^2 \leq (1 + s) \|u\|^2 + \left(1 + \frac{1}{s}\right) \|h\|^2. \quad (67)$$

*Or, equivalent,*

$$\pm 2\langle u, h \rangle \leq s\|u\|^2 + \frac{1}{s}\|h\|^2. \quad (68)$$

**Proof of Lemma 3.** Let  $u' = \sqrt{s}u$ ,  $h' = \frac{h}{\sqrt{s}}$ . Then (68) can be rewritten as

$$\pm 2\langle u', h' \rangle \leq \|u'\|^2 + \|h'\|^2.$$

Or, equivalent,  $\|u' \pm h'\|^2 \geq 0$ .

■
